# Supplementary material for: Global eHealth capacity: secondary analysis of WHO data on eHealth and implications for kidney care delivery in low-resource settings
Source: PubMed Central journal article supplement — BMJ Open. 2022 Mar 23;12(3):e055658. doi: 10.1136/bmjopen-2021-055658 (PMC8943769; doi:10.1136/bmjopen-2021-055658), 2022-03-23
Supplement: bmjopen-2021-055658.draft_revisions.pdf [file bmjopen-2021-055658.draft_revisions.pdf]

# BMJ Open

BMJ Open is committed to open peer review. As part of this commitment we make the peer review history of every article we publish publicly available.

When an article is published we post the peer reviewers' comments and the authors' responses online. We also post the versions of the paper that were used during peer review. These are the versions that the peer review comments apply to.

The versions of the paper that follow are the versions that were submitted during the peer review process. They are not the versions of record or the final published versions. They should not be cited or distributed as the published version of this manuscript.

BMJ Open is an open access journal and the full, final, typeset and author-corrected version of record of the manuscript is available on our site with no access controls, subscription charges or pay-per-view fees (<http://bmjopen.bmj.com>).

If you have any questions on BMJ Open's open peer review process please email [info.bmjopen@bmj.com](mailto:info.bmjopen@bmj.com)

# BMJ Open

## Global Status of Infrastructure and Opportunities for eHealth: Implications for Kidney Care Delivery in Low-income and Lower-Middle-Income Countries

|                               |                                                                                                                                                                                                                                                                                                                                                                                                                                                                                                                                                                                                                                                                                                                                                                                                                                                                                                                                                                                                                                                                                                                                                                                                                                                                                                                                                                                                                                          |
|-------------------------------|------------------------------------------------------------------------------------------------------------------------------------------------------------------------------------------------------------------------------------------------------------------------------------------------------------------------------------------------------------------------------------------------------------------------------------------------------------------------------------------------------------------------------------------------------------------------------------------------------------------------------------------------------------------------------------------------------------------------------------------------------------------------------------------------------------------------------------------------------------------------------------------------------------------------------------------------------------------------------------------------------------------------------------------------------------------------------------------------------------------------------------------------------------------------------------------------------------------------------------------------------------------------------------------------------------------------------------------------------------------------------------------------------------------------------------------|
| Journal:                      | <i>BMJ Open</i>                                                                                                                                                                                                                                                                                                                                                                                                                                                                                                                                                                                                                                                                                                                                                                                                                                                                                                                                                                                                                                                                                                                                                                                                                                                                                                                                                                                                                          |
| Manuscript ID                 | bmjopen-2021-055658                                                                                                                                                                                                                                                                                                                                                                                                                                                                                                                                                                                                                                                                                                                                                                                                                                                                                                                                                                                                                                                                                                                                                                                                                                                                                                                                                                                                                      |
| Article Type:                 | Original research                                                                                                                                                                                                                                                                                                                                                                                                                                                                                                                                                                                                                                                                                                                                                                                                                                                                                                                                                                                                                                                                                                                                                                                                                                                                                                                                                                                                                        |
| Date Submitted by the Author: | 21-Jul-2021                                                                                                                                                                                                                                                                                                                                                                                                                                                                                                                                                                                                                                                                                                                                                                                                                                                                                                                                                                                                                                                                                                                                                                                                                                                                                                                                                                                                                              |
| Complete List of Authors:     | Okpechi, Ikechi G ; University of Cape Town, Medicine<br>Muneeb, Shezel; University of Alberta, Department of Medicine<br>Ye, Feng; University of Alberta, Department of Medicine<br>Zaidi, Deenaz; University of Alberta, Medicine<br>Ghimire, Anukul; University of Alberta, Department of Medicine<br>Tinwala, Mohammed; University of Alberta, Department of Medicine<br>Saad, Syed; University of Alberta, Department of Medicine<br>Osman, Mohamed; University of Alberta, Medicine<br>Lunyera, Joseph; Duke University School of Medicine, Medicine<br>Tonelli, Marcello; University of Calgary Cumming School of Medicine, Department of Medicine<br>Caskey, Fergus; University of Bristol Faculty of Medicine and Dentistry, Department of Medicine<br>George, Cindy; South African Medical Research Council, Non-Communicable Diseases Research Unit<br>Kengne, AP; Medical Research Council of South Africa, Non-Communicable Diseases Research Unit<br>Malik, Charu; International Society of Nephrology, Administration<br>Damster, Sandrine; International Society of Nephrology, Administration<br>Levin, Adeera; University of British Columbia, Division of Nephrology<br>Johnson, David; The University of Queensland Faculty of Medicine and Biomedical Sciences, Department of Medicine<br>Jha, Vivekanand; The George Institute for Global Health India, Department of Medicine<br>Bello, A; University of Alberta, |
| Keywords:                     | COVID-19, Chronic renal failure < NEPHROLOGY, International health services < HEALTH SERVICES ADMINISTRATION & MANAGEMENT, Organisation of health services < HEALTH SERVICES ADMINISTRATION & MANAGEMENT                                                                                                                                                                                                                                                                                                                                                                                                                                                                                                                                                                                                                                                                                                                                                                                                                                                                                                                                                                                                                                                                                                                                                                                                                                 |
|                               |                                                                                                                                                                                                                                                                                                                                                                                                                                                                                                                                                                                                                                                                                                                                                                                                                                                                                                                                                                                                                                                                                                                                                                                                                                                                                                                                                                                                                                          |

SCHOLARONE™  
Manuscripts

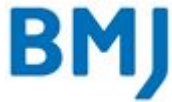

I, the Submitting Author has the right to grant and does grant on behalf of all authors of the Work (as defined in the below author licence), an exclusive licence and/or a non-exclusive licence for contributions from authors who are: i) UK Crown employees; ii) where BMJ has agreed a CC-BY licence shall apply, and/or iii) in accordance with the terms applicable for US Federal Government officers or employees acting as part of their official duties; on a worldwide, perpetual, irrevocable, royalty-free basis to BMJ Publishing Group Ltd ("BMJ") its licensees and where the relevant Journal is co-owned by BMJ to the co-owners of the Journal, to publish the Work in this journal and any other BMJ products and to exploit all rights, as set out in our [licence](#).

The Submitting Author accepts and understands that any supply made under these terms is made by BMJ to the Submitting Author unless you are acting as an employee on behalf of your employer or a postgraduate student of an affiliated institution which is paying any applicable article publishing charge ("APC") for Open Access articles. Where the Submitting Author wishes to make the Work available on an Open Access basis (and intends to pay the relevant APC), the terms of reuse of such Open Access shall be governed by a Creative Commons licence – details of these licences and which [Creative Commons](#) licence will apply to this Work are set out in our licence referred to above.

Other than as permitted in any relevant BMJ Author's Self Archiving Policies, I confirm this Work has not been accepted for publication elsewhere, is not being considered for publication elsewhere and does not duplicate material already published. I confirm all authors consent to publication of this Work and authorise the granting of this licence.

**Title:** Global Status of Infrastructure and Opportunities for eHealth: Implications for Kidney Care Delivery in Low-income and Lower-Middle-Income Countries.

**Authors:** Ikechi G. Okpechi,<sup>1</sup> Shezel Muneer,<sup>1</sup> Feng Ye,<sup>1</sup> Deenaz Zaidi,<sup>1</sup> Anukul Ghimire,<sup>1</sup> Mohammed Tinwala,<sup>1</sup> Syed, Saad,<sup>1</sup> Mohamed Osman,<sup>1</sup> Joseph Lunyera,<sup>2</sup> Marcello Tonelli,<sup>3</sup> Fergus Caskey,<sup>4</sup> Cindy George,<sup>5</sup> Andre P. Kengne,<sup>5</sup> Charu Malik,<sup>6</sup> Sandrine Damster,<sup>6</sup> Adeera Levin,<sup>7</sup> David W. Johnson,<sup>8,9,10</sup> Vivekanand Jha,<sup>11,12,13</sup> Aminu K. Bello<sup>1</sup>

**Affiliations:**

<sup>1</sup> Division of Nephrology, Department of Medicine, University of Alberta, Edmonton, Canada

<sup>2</sup> Division of General Internal Medicine, Department of Medicine, Duke University School of Medicine, Durham, North Carolina

<sup>3</sup> Department of Medicine, University of Calgary, Calgary, Alberta, Canada

<sup>4</sup> Department of Medicine, Population Health Sciences, Bristol Medical School, University of Bristol, Bristol, UK

<sup>5</sup> Non-communicable Diseases Research Unit, South African Medical Research Council (SAMRC), Tygerberg, South Africa

<sup>6</sup> International Society of Nephrology, Brussels, Belgium

<sup>7</sup> Division of Nephrology, Department of Medicine, University of British Columbia, Vancouver, British Columbia, Canada

<sup>8</sup> Department of Nephrology, Metro South and Integrated Nephrology and Transplant Services (MINTS), Princess Alexandra Hospital, Brisbane, Queensland, Australia

<sup>9</sup> Centre for Kidney Disease Research, University of Queensland at Princess Alexandra Hospital, Brisbane, Queensland, Australia

<sup>10</sup> Translational Research Institute, Brisbane, Queensland, Australia

<sup>11</sup> George Institute for Global Health, University of New South Wales (UNSW), New Delhi, India

<sup>12</sup> School of Public Health, Imperial College, London, UK

<sup>13</sup> Manipal Academy of Higher Education, Manipal, India

**Address for Correspondence and Reprints****Name:** Aminu K. Bello**Address:** Division of Nephrology and Immunology, Department of Medicine, University of Alberta, Edmonton, Alberta, Canada**Email:** [aminu1@ualberta.ca](mailto:aminu1@ualberta.ca)**Abstract word count (296)****Manuscript word count (3,796)****Keywords:** chronic kidney disease, eHealth, electronic health records, mHealth, telehealth, workforce

For peer review only

## Abstract

### Objective:

To describe the regional status of digital services for kidney care across eight eHealth themes: eHealth foundations, mobile health (mHealth), telehealth, eLearning, electronic health records, legal frameworks for eHealth, social media and big data.

### Design, setting and participants:

We used data from the World Health Organization (WHO) third global survey on eHealth, as well as data from the World Bank, and Internet World Stats on global digital services. Data were recategorized by International Society of Nephrology (ISN) regions and presented descriptively.

### Outcome measures:

The availability of digital services and governance frameworks for kidney care across ISN regions.

### Results:

The survey conducted by the WHO received responses from 125 (64.4%) Member States representing 4.4 billion people globally. The number of mobile cellular subscriptions were < 100% of the population in Africa, South Asia, North America, and North East Asia; percentage of internet users increased from 2015 to 2020 in all regions. Western Europe had the highest percentage of internet users in all the periods: 2015 (82.0%), 2019 (90.7%), and 2020 (93.9%); Africa had the least: 9.8%, 21.8% and 31.4%, respectively. The North East Asia region had the highest availability of national electronic health record system (75%) and eLearning access in medical schools (100%) with the lowest in Africa (27% and 39%, respectively). Policies concerning governance aspects of eHealth (e.g. privacy, liability, data sharing) were more widely available in high-income countries (55% to 93%) than in low-income countries (0% to 47%) while access to mHealth for treatment adherence was more available in low-income countries (21%) than in high-income countries (7%).

### Conclusion:

The penetration of eHealth services across ISN regions is suboptimal, particularly in low-income countries. Increasing utilization of internet communication technologies provides an opportunity to improve access to kidney education and care globally, especially in low-income countries.

**Strengths and Limitations of this study:**

- This study identified gaps in eHealth services available for kidney care across countries and regions of the International Society of Nephrology (ISN).
- We highlighted the increasing availability of mobile / cellular subscriptions and the number of internet users observed in various countries from 2015 to 2020, especially those in low-income groups.
- The study also highlights the lack of policy and governance strategies relevant to eHealth (e.g. privacy, liability, data sharing / ownership), as well as poor utilization of eHealth for learning and health information systems.
- Although workforce shortages for learning, training and delivery of kidney care are more pronounced in low resource settings than in high-income countries, we emphasized that this can be substantially mitigated by leveraging the increasing availability of electronic platforms to improve kidney health.
- A limitation of this work may relate to the non-participation in the survey used for our study of a few countries with large populations in their regions.

For peer review only

## Introduction:

Approximately 97% of people worldwide live within reach of a mobile cellular signal.<sup>1</sup> The widespread availability of this service can be a platform for increased utilization of registries, electronic health records and diseases surveillance systems to empower monitoring and reporting of disease incidence and prevalence,<sup>2</sup> patient outcomes,<sup>3</sup> and quality and safety of delivered care<sup>3,4</sup> as well as to allow comparison between and within health services.<sup>5-7</sup> eHealth is the cost-effective and secure use of information and communications technologies (ICT) in support of health and health-related fields, including health-care services, health surveillance, health literature, and health education, knowledge and research.<sup>8</sup> According to the World Health Organization (WHO), 87% of Member States have one or more national mHealth initiatives, 58% have an effective strategy for eHealth, 55% have legislation to protect electronic patient data.<sup>8</sup>

In the current era of the COVID-19 global pandemic, the potential for using eHealth to transform kidney disease management is increasingly recognized.<sup>9,10</sup> A cross-sectional survey conducted by the International Society of Nephrology (ISN) Global Kidney Health Atlas (GKHA) in 2017 reported low utilization of health information systems (HIS) in the care of patients with kidney failure, especially in low-income countries (LICs) and lower-middle-income countries (LMICs).<sup>11</sup> However, the survey was limited by a focus on registries.<sup>11</sup> Furthermore, a systematic review of 43 studies that included 6,617 participants and evaluated the impact of an eHealth intervention in people with CKD did not find sufficient value for eHealth in patients with CKD although eHealth was suggested to be useful for dietary sodium intake and fluid management.<sup>12</sup> However, other studies have shown that some forms of eHealth (e.g. telenephrology) are useful for improving access to kidney care in primary care settings,<sup>13</sup> for self-management for patients with CKD,<sup>14</sup> for nurse



1  
2  
3 practitioner and nephrologist training and education,<sup>15,16</sup> and for safe, economical and  
4  
5 efficient care delivery in rural and remote areas.<sup>17</sup> The current manuscript describes the status  
6  
7 of eHealth services and eHealth governance across ISN regions, using data from the World  
8  
9 Health Organization (WHO) third global survey on eHealth.<sup>18</sup> We also appraise the  
10  
11 implications of our findings for kidney care across ISN regions.  
12  
13  
14  
15  
16

## 17 **Methods**

18  
19 We leveraged published data from the WHO third global survey on eHealth.<sup>18</sup> The survey  
20  
21 methodology is summarized as follows. The survey was developed and conducted by the  
22  
23 WHO through the Global Observatory for eHealth (GOe) with input and consultation from  
24  
25 experts in digital health. The survey assessed eight themes in eHealth including: (i) eHealth  
26  
27 foundations, (ii) mobile health (mHealth), (iii) telehealth, (iv) eLearning, (v) electronic health  
28  
29 records (EHR), (vi) legal frameworks for eHealth, (vii) social media and (viii) big data.  
30  
31  
32

33 Concise definitions of these themes are provided:

- 34  
35 – **eHealth:**<sup>19</sup> the cost-effective and secure use of information communication  
36  
37 technologies (ICT) in support of health and health related fields, including health-care  
38  
39 services, health surveillance, health literature, and health education, knowledge and  
40  
41 research.  
42  
43
- 44  
45 – **mHealth:**<sup>18</sup> the use of mobile devices, such as mobile phones, patient monitoring  
46  
47 devices, Personal Digital Assistants (PDAs), and wireless devices, for medical and  
48  
49 public health practice.  
50  
51
- 52  
53 – **Telehealth:**<sup>18</sup> the delivery of health care services through ICT for the exchange of  
54  
55 information in real time (synchronously) or by store-and-forward methods  
56  
57 (asynchronously) for the diagnosis and treatment of diseases and injuries, research  
58  
59  
60

1  
2  
3 and evaluation, and for the continuing education of health professionals where  
4 patients and care providers are separated by distance.

- 5  
6  
7  
8 – **eLearning:**<sup>20</sup> the use of ICT for education  
9  
10 – **Electronic Health Records (EHR):**<sup>18</sup> real-time, patient-centred records that provide  
11 immediate and secure information to authorized users and typically contain a patient's  
12 medical history, diagnoses and treatment, medications, allergies, immunizations, as  
13 well as radiology images and laboratory results.  
14  
15 – **Legal framework for eHealth:**<sup>18</sup> the legislative process addressing transfer and use  
16 of information between health care workers and patients that is relevant to issues of  
17 privacy and confidentiality of patient data, access rights and sharing rights for data,  
18 addressing data quality and integrity as a basis for clinical and patient decision-  
19 making and rules governing the adaptation of professional liability to accommodate  
20 care provided remotely or virtually.  
21  
22 – **Social Media:**<sup>18</sup> interactive platforms for individuals, communities and organizations  
23 to share and discuss content, debate issues and promote new ideas e.g. Facebook,  
24 Twitter or YouTube.  
25  
26 – **Big data:**<sup>18</sup> refers to extremely large data sets that encompass a range of data  
27 including clinical data from electronic health records; the phenotype; genomic  
28 information; and data on other determinants of health such as environment and  
29 lifestyle.  
30  
31  
32  
33  
34  
35  
36  
37  
38  
39  
40  
41  
42  
43  
44  
45  
46  
47  
48  
49  
50

51  
52 The survey was developed in English and translated into seven languages (Arabic,  
53 Chinese, English, French, Russian, Spanish and Portuguese) to improve country responses  
54 and accuracy of responses. A web-based tool, (LimeSurvey -  
55  
56  
57  
58 <https://www.limesurvey.org/en/>), was used for online form creation, data collection and  
59  
60

1  
2  
3 management. WHO regional offices staff assisted in coordinating the survey process and  
4  
5 liaising with the GOe Secretariat in Geneva. National level survey coordinators, together with  
6  
7 relevant ministries and academic and research institutions identified between 5 and 10  
8  
9 national expert informant groups in eHealth to participate in the survey. The group consisted  
10  
11 of eHealth specialists, professionals in telehealth, EHRs, mHealth and statisticians  
12  
13 responsible for national health data. Expert informants met for one day to reach consensus on  
14  
15 a single national-level response. Hence, each participating country submitted a single national  
16  
17 survey with input from its group of expert informants. The survey was conducted between 1  
18  
19 April and 30 June 2015. Data on information and communication technology (ICT) indices  
20  
21 were obtained from the World Bank<sup>21</sup> while more recent (2019 and 2020) data on internet  
22  
23 usage were obtained from Internet World Stats (<https://www.internetworldstats.com/>).

### 30 31 **Data handling and processing**

32  
33 After receiving the completed questionnaires, all non-English responses were  
34  
35 translated into English and survey responses were checked for consistency. Data were then  
36  
37 analyzed by thematic sections using computed percentages for each “yes” response to obtain  
38  
39 the overall results for all responding countries and regions. We regrouped country responses  
40  
41 using the ten ISN regional classification: Africa, East and Central Europe, Latin America,  
42  
43 Middle East, Newly Independent States (NIS) and Russia, North America and Caribbean,  
44  
45 North and East Asia, Oceania and South East Asia (OSEA), South Asia and Western Europe  
46  
47 (<https://www.theisn.org/about-isn/governance/regional-boards/>). Country responses were also  
48  
49 grouped according to World Bank income groups. Data on mobile-cellular subscriptions and  
50  
51 internet users in each region were provided as the median percentage of the total population  
52  
53 of participating regions. No statistical comparisons were used for describing the data which  
54  
55 were presented in percentages.  
56  
57  
58  
59  
60

## **Patient and public involvement:**

Patients or the public were not involved in the design, or conduct, or reporting, or dissemination plans of our research.

## **Results**

### ***(i) Participating country indices***

A response to the survey was received from 125 WHO Member States out of 194 Member States that were surveyed, representing a response rate of 64.4% and a total population of 4.39 billion people. The list of participating countries based on ISN regional groups is presented in Supplementary Table S1 and a summary of the demographic, economic and health metrics for each region is shown in Table 1. Overall, the median ICT development index for participating countries was 4.8 (95% CI: 2.9-6.9). Four regions: Africa (2.3), South Asia (2.3), OSEA (4.0) and Latin America (4.4) had lower indices compared to the median value while Western Europe had the highest (7.9). Subscriptions to mobile-cellular networks was highest in the Latin America region (124.6% [95% CI: 89.9 – 142.7]) and lowest in South Asia (71.3% [95% CI: 63.7 – 120.6]) while percentage of the population that used the internet was highest in Western Europe (82.0% [95% CI: 70.0 – 93.0]) and lowest in Africa (9.8% [95% CI: 3.0 – 18.1]) (Figure 1). However, internet users increased across all regions in 2019 and 2020, including Africa (21.8% and 31.4%, respectively) and South Asia (34% and 46%, respectively) (Figure 1).

### ***(ii) National eHealth policies, funding and capacity building***

A national policy for eHealth was available in all participating countries in North America (100%) and North East Asia (100%) and was lowest in participating countries from

1  
2  
3 Africa (42%) and East and Central European countries (47%) (Figure S1). Availability of  
4 policies governing health information systems (HIS) in countries across regions also varied  
5  
6 across regions. Overall, participating countries reported multiple sources of funding for  
7  
8 eHealth including public (77%), donor (non-public) (63%), private (commercial) (40%) and  
9  
10 public-private partnerships (42%) and LICs and LMICs relied more on donor funding for  
11  
12 eHealth services (Figure S2). Overall, pre-service, and in-service training in eHealth were  
13  
14 available in 74% and 77%, respectively. Pre-service training was lowest in Africa (55%) and  
15  
16 highest in NIS and Russia (100%) and North America (100%). In-service training was lowest  
17  
18 in Africa (58%) and highest in North and East Asia (100%) (Figure S3).  
19  
20  
21  
22  
23  
24  
25

### 26 **(iii) mHealth**

27  
28 Data on access to mHealth across 3 of the 6 domains reported (toll-free emergency,  
29  
30 appointment reminders and treatment adherence) are provided in Supplementary Table S2.  
31  
32 International toll-free emergency access to mHealth was available in only 2 regions: OSEA  
33  
34 (10%) and Western Europe (11%) and was unavailable in all regions for appointment  
35  
36 reminders. National toll-free emergency access to mHealth services was variably available in  
37  
38 all regions. Access to National mHealth services for treatment adherence was mostly  
39  
40 available in low-income countries (21%) and was lowest in high-income countries (HICs)  
41  
42 (7%).  
43  
44  
45  
46  
47  
48

### 49 **(iv) Telehealth**

50  
51 Teledermatology, telepathology, teleradiology and telepsychiatry were reported but  
52  
53 telenephrology programs were not reported. Nonetheless, services for remote patient  
54  
55 monitoring were mostly available in HICs (40%) and at the local / peripheral health care  
56  
57 system level with the program fully established only in 26% of countries (Table 2).  
58  
59  
60

1  
2  
3  
4  
5  
6 **(v) eLearning in health sciences**  
7

8           The availability of eLearning for health sciences students (pre-service) and health  
9 professionals (in-service) in Medicine (Medical School), nursing and midwifery and  
10 pharmacy are reported in Figure S4. Use of eLearning in Medical school was highest in North  
11 East Asia (100%) and lowest in South Asia (40%) and Africa (39%). North East Asia also  
12 had the highest use of eLearning services for pre-service training of nurses and midwives  
13 (75%) and pharmacists (100%). Use of eLearning for pharmacists training was unavailable in  
14 South Asia (Figure S4).  
15  
16  
17  
18  
19  
20  
21  
22  
23  
24  
25

26 **(vi) Electronic health records (EHR) systems**  
27

28           National EHR systems were mostly available in in North East Asia (75%) while  
29 countries in Africa had the least availability of EHR systems (27%) (Figure 2A). Overall,  
30 secondary healthcare facilities were more likely to have EHR systems (42%) than primary  
31 healthcare (41%) or tertiary healthcare facilities (39%) (Figure S5). Secondary and tertiary  
32 facilities in the NIS and Russia region had the highest availability of EHR systems (73% and  
33 64%, respectively) while all tiers of healthcare facilities in Africa had the lowest (Figure S5).  
34 Availability of laboratory information systems, pathology information systems, picture  
35 archiving and communication system (PACS) and pharmacy information systems by income  
36 groups are shown in Figures 2B-2E with most regions reporting low availability of these  
37 systems for healthcare. Human resource availability for HIS was similar across income  
38 groups but was highest in the Oceania and the South East Asia region (80%) (Figure S6).  
39  
40  
41  
42  
43  
44  
45  
46  
47  
48  
49  
50  
51  
52  
53  
54  
55

56 **(vii) Legal frameworks for eHealth**  
57  
58  
59  
60

1  
2  
3 Aspects of the legal framework governing use of eHealth were not readily available  
4 across countries and regions (Figure S7). For instance, countries from the South Asia region,  
5 did not have frameworks governing liability or reimbursement for eHealth, patient safety and  
6 quality of care based on data quality, protection of the privacy of individuals, sharing of  
7 digital data between health professionals and sharing of personal health data between  
8 research entities (Figure S7).  
9  
10  
11  
12  
13  
14  
15  
16  
17  
18

### 19 **(viii) Social media**

20  
21 National policy on use of social media by government organizations was lacking and  
22 ranged from as low as 9% in the NIS and Russia region to 50% in the North East Asia region.  
23 However, specific policy on the use of social media in the health domain was unavailable in  
24 six regions (Eastern and Central Europe, Latin America, Middle East, NIS & Russia, North  
25 America and South Asia). When utilized, social media were mostly used for making  
26 emergency announcements, general health announcements and for health promotion  
27 campaigns (Figure S8).  
28  
29  
30  
31  
32  
33  
34  
35  
36  
37  
38  
39

### 40 **(ix) Big data**

41  
42 Information on policy or strategies that govern use of big data in the health sector and  
43 private companies was sparsely reported. In the health sector, 75% of countries in North East  
44 Asia had such policies in place (Figure S9).  
45  
46  
47  
48  
49  
50

## 51 **Discussion**

52  
53 The United Nations Sustainable Development Goals emphasizes the great potential of  
54 the spread of information and communications technology and global interconnectedness to  
55 accelerate human progress, and to bridge the digital divide to develop knowledge in  
56  
57  
58  
59  
60

1  
2  
3 societies.<sup>22</sup> The ISN-GKHA has identified large and varied gaps in resources and workforce  
4 required for adequate provision of kidney care across several countries, particularly in LICs  
5 and LMICs in all the ISN regions. eHealth services may be potential vehicle to harness local  
6 resources for improvements in kidney care. This study, which mainly analyzed WHO eHealth  
7 survey data using the ISN regional groups, found low ICT development indices mostly in  
8 LIC and LMICs, low availability of national EHR and proportion of national eHealth policies  
9 in LICs and LMICs, increased utilization of mHealth services in low-income settings, lack of  
10 use of eLearning across regions and absence of legal frameworks governing use of eHealth in  
11 several ISN regions. These findings underscore the need for concerted action if eHealth is to  
12 achieve its potential for reducing inequities in kidney care across regions and countries.  
13  
14  
15  
16  
17  
18  
19  
20  
21  
22  
23  
24  
25  
26  
27

28 A major challenge in accessing kidney care in many countries is the lack of skilled  
29 workforce, specifically the absence of an adequate number of nephrologists.<sup>23</sup> The  
30 nephrologist density in HICs in North America and Western Europe is more than 90 times  
31 that in low-income countries in Africa, South Asia and Oceania region (28.52 per million  
32 population [pmp] vs. 0.31 pmp),<sup>24</sup> suggesting a clear disadvantage in care access for  
33 populations with low nephrologist densities.<sup>25</sup> In a global survey Lunney et al identified  
34 geography and low nephrology workforce to be associated with lack of access to kidney care,  
35 especially in low-income countries.<sup>26</sup> Low nephrology workforce, particularly in rural or  
36 remote areas often means long travel distance to access care<sup>27</sup> with potentially negative  
37 consequences, including increased cost of care, low quality of life,<sup>28</sup> lack of access to kidney  
38 replacement therapies (KRT; i.e. dialysis and transplantation)<sup>28-30</sup> and increased likelihood of  
39 death.<sup>31</sup> In a large South African Province with only 2 public service nephrologists, a study  
40 that assessed the predictors of mortality in rural dwelling patients receiving KRT at a district  
41 hospital, found mortality to be higher in PD patients ( $P < 0.001$ ) who travelled farther to reach  
42  
43  
44  
45  
46  
47  
48  
49  
50  
51  
52  
53  
54  
55  
56  
57  
58  
59  
60



1  
2  
3 the hospital than those treated with HD.<sup>29</sup> These challenges are not limited to low resource  
4 countries, however. One study from Australia estimated that use of telehealth services for  
5 evaluating post-transplant patients resulted in a net saving of 203,202 kilometres in patient  
6 travel distance; 2771 hours in car travel time; about AUD \$31,048 in petrol savings and 51  
7 tonnes CO<sub>2</sub> equivalents of greenhouse gas emissions.<sup>27</sup> Due to the widespread availability of  
8 mobile cellular signals,<sup>1</sup> cellular and internet technologies have potential to improve access to  
9 nephrology care in remote and/or underserved settings. Access to care can also be improved  
10 in children with kidney diseases given the significant shortage of paediatric nephrologists<sup>32</sup>  
11 and mitigate high mortality identified in children with kidney failure in regions such as  
12 Africa.<sup>33</sup> The global COVID-19 pandemic demonstrates that use of eHealth technologies will  
13 likely increase over the coming years,<sup>34,35</sup> thereby highlighting the need to strengthen  
14 governance on how eHealth systems are utilized across ISN regions. Care of patients with  
15 CKD has been grossly affected during the pandemic, and it falls upon the stakeholder  
16 community to develop sustainable solutions.

17  
18  
19  
20  
21  
22  
23  
24  
25  
26  
27  
28  
29  
30  
31  
32  
33  
34  
35  
36  
37  
38 The prevalence of CKD risk factors such as hypertension and diabetes mellitus  
39 continue to increase globally. The rise is projected to be significant, especially in LICs and  
40 LMICs of South and South East Asia and Africa.<sup>36,37</sup> For instance, globally, 79% of people  
41 with diabetes live in LICs or LMICs (mostly Oceania, South and South East Asia region) and  
42 projections of diabetes prevalence by 2045 suggest an increase of 143% in Africa, 96% in the  
43 Middle East and 74% in South East Asia compared with 15% and 33% increase in Europe  
44 and North America, respectively.<sup>36</sup> Innovative models of care delivery are therefore needed to  
45 manage the growing disease burden. Given the wide coverage of mobile phone networks,  
46 mHealth holds promise as an important delivery tool for health care delivery in resource  
47 constrained regions (Figure 1). mHealth interventions are in use for diagnosis and  
48  
49  
50  
51  
52  
53  
54  
55  
56  
57  
58  
59  
60

1  
2  
3 management of various infectious diseases including malaria,<sup>38</sup> tuberculosis,<sup>39</sup> and HIV<sup>40</sup> and  
4 for improving maternal and foetal health<sup>41</sup> in several developing countries. Although mHealth  
5 interventions are increasingly used for non-communicable diseases,<sup>42-44</sup> some studies  
6 highlight only a modest impact in NCD control likely due to limited number of studies and  
7 impact on process of care alone.<sup>45,46</sup> Our analysis showed that use of mHealth (appointment  
8 reminders and treatment adherence) and telehealth services (remote patient monitoring) were  
9 much higher in LICs and LMICs than in HICs (Supplementary Table S2 and Table 2). In a  
10 study conducted in a rural Indonesian population multifaceted mobile technology-supported  
11 primary health care intervention was associated with greater use of preventive CVD  
12 medication and lower BP levels among high-risk individuals.<sup>47</sup> These findings suggest that  
13 despite the relatively low current use, mHealth may be potentially useful for supporting case-  
14 finding for CKD,<sup>48</sup> CKD-specific education to improve awareness, integrated care delivery  
15 and efficient referral pathways, and perhaps allow quality control through real-time  
16 monitoring.<sup>49</sup>

17  
18  
19  
20  
21  
22  
23  
24  
25  
26  
27  
28  
29  
30  
31  
32  
33  
34  
35  
36  
37  
38 To guide implementation, ethical issues including type and quality of digital  
39 technology, doctor-patient relationship, data confidentiality and security, informed consent  
40 and patients and families satisfaction with telemedicine services should be considered in  
41 framing legal governance for eHealth.<sup>50</sup> Increasing the use of such technologies will require  
42 demonstration of public benefits (e.g. cost saving),<sup>51</sup> while ensuring that there is no  
43 discrimination or digital inequality (e.g. not tailored to only those with a smartphone or for  
44 the disabled)<sup>52</sup> and to protect patient and data privacy.<sup>53</sup> As our study shows, the legal  
45 frameworks that govern sharing of personal health data or digital data and protect the privacy  
46 of individual health-related data were either low or absent in many regions. There is need to  
47 address such legislation in all regions (Figure S7).

1  
2  
3  
4  
5  
6 Our study also identified EHR use to be low in LICs and LMICs with poor utilization  
7  
8 of eLearning for pre-and in-service training in the health sectors (Figure S5). Barriers that  
9  
10 impede adoption and/or implementation of EHR systems such as cost (including setting up,  
11  
12 maintenance and ongoing costs), technical concerns, technical support, resistance to changing  
13  
14 work habits, loss of income and loss of productivity will need to be identified in each setting  
15  
16 and addressed. As Kruse et al<sup>54</sup> have suggested, policy makers will need to consider  
17  
18 incentives that reduce the implementation cost of EHR, possibly aimed more directly at  
19  
20 organizations that are known to have lower adoption rates, such as small hospitals in rural  
21  
22 areas. However, this may be possible in HICs where such technologies are readily available,  
23  
24 whereas in LICs and LMICs, such incentives should be targeted towards secondary and  
25  
26 tertiary care centres that serve a wider population. Measures that ensure successful adoption  
27  
28 and implementation of EHR technology including systems usability, interoperability, and  
29  
30 adaptability need to be considered in terms of local context, individual end-users and  
31  
32 advancing technology.<sup>55</sup>  
33  
34  
35  
36  
37  
38  
39  
40

41 The potential and value of eLearning in addressing workforce shortages<sup>20,56</sup> and the  
42  
43 educational needs of health professionals, especially in developing countries is well  
44  
45 recognized.<sup>57</sup> The ISN fellowship program recently included hybrid (online plus hands-on)  
46  
47 training as part of the strategy for improving training of nephrologists from low-resource  
48  
49 settings.<sup>23</sup> This can improve training in glomerular diseases (histopathology), assessment of  
50  
51 urine microscopic findings as well as various aspects of interventional nephrology including  
52  
53 dialysis catheter insertion and care. A number of groups have used virtual platforms to upskill  
54  
55 healthcare workers in the care of patients with COVID-19 in India and Africa.<sup>58</sup> Access to the  
56  
57 basic IT infrastructure (e.g. computers and internet) remains a major hurdle to the  
58  
59  
60

1  
2  
3 implementation of technology-enhanced teaching in developing countries.<sup>57</sup> Any solution  
4 should be sensitive to local resources and be designed to operate at low cost (data, device).  
5  
6 One study that assessed the awareness, attitudes, preferences, and challenges to eLearning  
7  
8 among medical and nursing students at Makerere University, Uganda identified low monthly  
9  
10 income, quality of internet connectivity and lack of computer ownership among factors that  
11  
12 significantly affected attitudes towards eLearning.<sup>59</sup> Perceived advantages of online learning  
13  
14 by medical students in the UK included time and money saved from lack of travel and  
15  
16 flexibility and ability to learn at one's own pace whereas family distractions, internet  
17  
18 connection and the timing of tutorials were identified as barriers.<sup>60</sup> The extent of integration  
19  
20 of eLearning in health sciences (Medicine, Nursing and midwifery and Pharmacy) for both  
21  
22 pre- and in-service training was low in most regions in our study (Figure S4). The impact of  
23  
24 an improved integration of eLearning in health sciences will be widespread across all medical  
25  
26 disciplines.  
27  
28  
29  
30  
31  
32  
33  
34

35 There were a few limitations to this study previously described in the WHO report.<sup>18</sup>  
36  
37 These include that WHO Member States were limited to one response per country i.e. expert  
38  
39 informants were required to propose a consensus response for each question which was  
40  
41 difficult in cases where the situation varied widely within the country. Also, although every  
42  
43 effort was made to select the best national experts to complete the instrument; the knowledge  
44  
45 capacity of each focus group to accurately answer the questions was not determined. Finally,  
46  
47 some countries with large populations (e.g. France, Germany, Brazil, Egypt, Nigeria and  
48  
49 India) did not participate in the 2015 survey. This is likely to have affected some of the  
50  
51 results of this survey e.g. proportion with access to the internet. Despite the limitations, this  
52  
53 study is the first to present a comprehensive overview of the status and penetration of eHealth  
54  
55 in ISN regions using data from the WHO global survey on eHealth. Our study has also been  
56  
57  
58  
59  
60

1  
2  
3 able to address identified gaps in availability of eHealth services and the implications of these  
4  
5 for kidney care across ISN regions, particularly for LICs and LMICs.  
6  
7  
8  
9

### 10 **Conclusion:**

11  
12 There is wide variation in the availability and accessibility of eHealth services across  
13  
14 ISN regions with much reduced availability and access in LICs and LMICs. This is likely to  
15  
16 have a significant negative impact for adequate kidney care provision in these regions,  
17  
18 especially at a time when there are global restrictions in face-to-face contacts. Even though  
19  
20 much infrastructure is required to set up such services, simple steps can be initiated towards  
21  
22 broader use of eHealth services to aid care including legislations and provision of national  
23  
24 guidelines / requirements on use of these technologies. Infrastructure development to improve  
25  
26 access to the internet will need to be improved across regions especially in low-income  
27  
28 countries. With rapidly evolving ICT technologies and as digitalization of medical education  
29  
30 and care continues to gather pace in the future of healthcare, further research on the impact of  
31  
32 eHealth in care of patients with kidney diseases is critical. The development of and access to  
33  
34 appropriate technologies which facilitate equitable and high-quality care are needed to ensure  
35  
36 no one is left behind.  
37  
38  
39  
40  
41  
42  
43  
44  
45  
46  
47  
48  
49  
50  
51  
52  
53  
54  
55  
56  
57  
58  
59  
60

1  
2  
3 **Contributors:** AKB conceptualized the research; SM, DZ and SS collated and checked the  
4 data for accuracy and completeness; FY analyzed the data; IGO designed the figures and  
5  
6 Tables and wrote the first draft of the manuscript. All authors provided inputs for the  
7  
8 interpretation of results and documentation of implications of the study findings in the  
9  
10 discussion. All authors contributed to the preparation of the final version of the manuscript.  
11  
12

13  
14 **Funding:** No funding was received for this work.  
15

16  
17 **Competing interests:** DWJ has received consultancy fees, research grants, speaker's  
18 honoraria and travel sponsorships from Baxter Healthcare and Fresenius Medical Care,  
19  
20 consultancy fees from Astra Zeneca and AWAK, speaker's honoraria and travel sponsorships  
21  
22 from ONO, and travel sponsorships from Amgen. He is a current recipient of an Australian  
23  
24 National Health and Medical Research Council Leadership Investigator Grant. The remaining  
25  
26 authors have no conflicts of interest to declare. VJ has received grants, speaker honoraria or  
27  
28 consultancy fees from GlaxoSmithKline, Biocon, Baxter, Janssen, Medtronic, and  
29  
30 NephroPlus. He has a policy of all funds being paid to his employer. AB has received  
31  
32 consultancy fees from Janssen  
33  
34  
35  
36

37 **Patient consent for publication:** Not required  
38

39  
40 **Ethics approval:** All data used in this study were already in the public domain and ethical  
41  
42 approval was not required.  
43

44 **Data availability statement:** No additional data are available.  
45

46  
47 **Acknowledgement:** We would like to thank Ms Sophanny Tiv (University of Alberta) for  
48  
49 assisting us with some of the Figures and charts.  
50  
51  
52  
53  
54  
55  
56  
57  
58  
59  
60

## References:

1. International Telecommunication Union (ITU). Measuring Digital Developments: Facts and Figures (2019). <https://itu.foleon.com/itu/measuring-digital-development/network-coverage/>. Accessed 18 December 2020.
2. Larsson S, Lawyer P, Garellick G, Lindahl B, Lundström M. Use of 13 disease registries in 5 countries demonstrates the potential to use outcome data to improve health care's value. *Health Aff (Millwood)*. 2012;31(1):220-227.
3. Hoque DME, Kumari V, Hoque M, Ruseckaite R, Romero L, Evans SM. Impact of clinical registries on quality of patient care and clinical outcomes: A systematic review. *PLoS One*. 2017;12(9):e0183667.
4. Han W, Sharman R, Heider A, Maloney N, Yang M, Singh R. Impact of electronic diabetes registry 'Meaningful Use' on quality of care and hospital utilization. *Journal of the American Medical Informatics Association : JAMIA*. 2016;23(2):242-247.
5. ERA-EDTA Registry. *ERA-EDTA Registry Annual Report 2017*. Amsterdam UMC, location AMC, Department of Medical Informatics, Amsterdam, the Netherlands, 2019.
6. USRDS. *United States Renal Data System. 2018 USRDS annual data report: Epidemiology of kidney disease in the United States*. National Institutes of Health, National Institute of Diabetes and Digestive and Kidney Diseases, Bethesda, MD, 2018. 2018.
7. Davids MR, Eastwood JB, Selwood NH, et al. A renal registry for Africa: first steps. *Clinical kidney journal*. 2016;9(1):162-167.
8. World Health Organization. eHealth at the WHO. <https://www.who.int/ehealth/about/en/>. Accessed 18 December 2020.
9. Singh T, Ngoh CL, Wong K, Khan BA. Impact of Telemedicine on Hospitalisation and Mortality Rates in Community-Based Haemodialysis Centres in Singapore during the COVID-19 Pandemic. *Ann Acad Med Singap*. 2020;49(10):756-763.
10. Wang CS, Ku E. eHealth in kidney care. *Nat Rev Nephrol*. 2020;16(7):368-370.
11. See EJ, Alrukhaimi M, Ashuntantang GE, et al. Global coverage of health information systems for kidney disease: availability, challenges, and opportunities for development. *Kidney Int Suppl (2011)*. 2018;8(2):74-81.
12. Stevenson JK, Campbell ZC, Webster AC, et al. eHealth interventions for people with chronic kidney disease. *The Cochrane database of systematic reviews*. 2019;8(8):Cd012379.
13. Zuniga C, Riquelme C, Muller H, Vergara G, Astorga C, Espinoza M. Using Telenephrology to Improve Access to Nephrologist and Global Kidney Management of CKD Primary Care Patients. *Kidney international reports*. 2020;5(6):920-923.
14. Shen H, van der Kleij R, van der Boog PJM, Chang X, Chavannes NH. Electronic Health Self-Management Interventions for Patients With Chronic Kidney Disease: Systematic Review of Quantitative and Qualitative Evidence. *Journal of medical Internet research*. 2019;21(11):e12384.
15. Osman MA, Okel J, Okpechi IG, Jindal K, Bello AK. Potential applications of telenephrology to enhance global kidney care. *BMJ Glob Health*. 2017;2(2):e000292.
16. Rutledge CM, Kott K, Schweickert PA, Poston R, Fowler C, Haney TS. Telehealth and eHealth in nurse practitioner training: current perspectives. *Adv Med Educ Pract*. 2017;8:399-409.
17. Venuthurupalli SK, Rolfe A, Fanning J, Cameron A, Hoy WE. Chronic Kidney Disease, Queensland (CKD.QLD) Registry: Management of CKD With Telenephrology. *Kidney international reports*. 2018;3(6):1336-1343.

18. World Health Organization. Global diffusion of eHealth: making universal health coverage achievable. Report of the third global survey on eHealth. Geneva: World Health Organization; 2016.  
[https://www.who.int/goe/publications/global\\_diffusion/en/](https://www.who.int/goe/publications/global_diffusion/en/). Accessed 19 December 2020.
19. World Health Organization. Resolution WHA58.33. Sustainable health financing, universal coverage and social health insurance. In: Fifty-eighth World Health Assembly, Geneva, 16–25 May 2005. Resolutions and decisions annex. Geneva: World Health Organization; 2005 [http://apps.who.int/gb/ebwha/pdf\\_files/WHA58-REC1/english/A58\\_2005\\_REC1-en.pdf](http://apps.who.int/gb/ebwha/pdf_files/WHA58-REC1/english/A58_2005_REC1-en.pdf). Accessed 18 December 2020.
20. Ruggeri K, Farrington C, Brayne C. A global model for effective use and evaluation of e-learning in health. *Telemedicine journal and e-health : the official journal of the American Telemedicine Association*. 2013;19(4):312-321.
21. World Bank. TCdata360: Country rank and value in the ITU ICT development index. [https://tcdata360.worldbank.org/indicators/h2e1ddd20?country=BRA&indicator=24719&viz=bar\\_chart&years=2015](https://tcdata360.worldbank.org/indicators/h2e1ddd20?country=BRA&indicator=24719&viz=bar_chart&years=2015). Accessed 18 December 2020.
22. United Nations. Transforming our world: the 2030 Agenda for Sustainable Development. <https://sdgs.un.org/2030agenda>. Accessed 16 October 2020.
23. Okpechi IG, Eddy AA, Jha V, Jacob T, Dupuis S, Harris DC. Impact of training nephrologists from developing nations and strategies for sustaining a training program in its fourth decade. *Kidney Int*. 2021;99(5):1073-1076.
24. Osman MA, Alrukhaimi M, Ashuntantang GE, et al. Global nephrology workforce: gaps and opportunities toward a sustainable kidney care system. *Kidney Int Suppl (2011)*. 2018;8(2):52-63.
25. Bello AK, Levin A, Lunney M, et al. Status of care for end stage kidney disease in countries and regions worldwide: international cross sectional survey. *Bmj*. 2019;367:15873.
26. Lunney M, Alrukhaimi M, Ashuntantang GE, et al. Guidelines, policies, and barriers to kidney care: findings from a global survey. *Kidney Int Suppl (2011)*. 2018;8(2):30-40.
27. Andrew N, Barraclough KA, Long K, et al. Telehealth model of care for routine follow up of renal transplant recipients in a tertiary centre: A case study. *J Telemed Telecare*. 2020;26(4):232-238.
28. Gray NA, Dent H, McDonald SP. Renal replacement therapy in rural and urban Australia. *Nephrol Dial Transplant*. 2012;27(5):2069-2076.
29. Tamayo Isla RA, Ameh OI, Mapiye D, et al. Baseline Predictors of Mortality among Predominantly Rural-Dwelling End-Stage Renal Disease Patients on Chronic Dialysis Therapies in Limpopo, South Africa. *PLoS One*. 2016;11(6):e0156642.
30. Tonelli M, Hemmelgarn B, Kim AK, et al. Association between residence location and likelihood of kidney transplantation in Aboriginal patients treated with dialysis in Canada. *Kidney Int*. 2006;70(5):924-930.
31. Tonelli M, Hemmelgarn B, Culleton B, et al. Mortality of Canadians treated by peritoneal dialysis in remote locations. *Kidney Int*. 2007;72(8):1023-1028.
32. McCulloch M, Luyckx VA, Cullis B, et al. Challenges of access to kidney care for children in low-resource settings. *Nat Rev Nephrol*. 2020.
33. Ashuntantang G, Osafo C, Olowu WA, et al. Outcomes in adults and children with end-stage kidney disease requiring dialysis in sub-Saharan Africa: a systematic review. *The Lancet Global health*. 2017;5(4):e408-e417.
34. Fernandes L, FitzPatrick ME, Roycroft M. The role of the future physician: building on shifting sands. *Clin Med (Lond)*. 2020;20(3):285-289.



- 1
- 2
- 3
- 4 35. Gasser U, Ienca M, Scheibner J, Sleigh J, Vayena E. Digital tools against COVID-19: taxonomy, ethical challenges, and navigation aid. *Lancet Digit Health*. 2020;2(8):e425-e434.
- 5
- 6
- 7 36. Cho NH, Shaw JE, Karuranga S, et al. IDF Diabetes Atlas: Global estimates of diabetes prevalence for 2017 and projections for 2045. *Diabetes research and clinical practice*. 2018;138:271-281.
- 8
- 9
- 10 37. Kearney PM, Whelton M, Reynolds K, Muntner P, Whelton PK, He J. Global burden of hypertension: analysis of worldwide data. *Lancet (London, England)*. 2005;365(9455):217-223.
- 11
- 12
- 13 38. Larocca A, Moro Visconti R, Marconi M. Malaria diagnosis and mapping with m-Health and geographic information systems (GIS): evidence from Uganda. *Malar J*. 2016;15(1):520.
- 14
- 15
- 16 39. Maraba N, Hoffmann CJ, Chihota VN, et al. Using mHealth to improve tuberculosis case identification and treatment initiation in South Africa: Results from a pilot study. *PLoS One*. 2018;13(7):e0199687.
- 17
- 18
- 19 40. Cooper V, Clatworthy J, Whetham J, Consortium E. mHealth Interventions To Support Self-Management In HIV: A Systematic Review. *Open AIDS J*. 2017;11:119-132.
- 20
- 21
- 22
- 23 41. Olajubu AO, Fajemilehin BR, Olajubu TO, Afolabi BS. Effectiveness of a mobile health intervention on uptake of recommended postnatal care services in Nigeria. *PLoS One*. 2020;15(9):e0238911.
- 24
- 25
- 26 42. Mao Y, Lin W, Wen J, Chen G. Impact and efficacy of mobile health intervention in the management of diabetes and hypertension: a systematic review and meta-analysis. *BMJ Open Diabetes Res Care*. 2020;8(1).
- 27
- 28
- 29 43. Lu X, Yang H, Xia X, et al. Interactive Mobile Health Intervention and Blood Pressure Management in Adults. *Hypertension*. 2019;74(3):697-704.
- 30
- 31
- 32 44. Li R, Liang N, Bu F, Hesketh T. The Effectiveness of Self-Management of Hypertension in Adults Using Mobile Health: Systematic Review and Meta-Analysis. *JMIR Mhealth Uhealth*. 2020;8(3):e17776.
- 33
- 34
- 35 45. Stephani V, Opoku D, Quentin W. A systematic review of randomized controlled trials of mHealth interventions against non-communicable diseases in developing countries. *BMC public health*. 2016;16:572.
- 36
- 37
- 38 46. Beratarrechea A, Moyano D, Irazola V, Rubinstein A. mHealth Interventions to Counter Noncommunicable Diseases in Developing Countries: Still an Uncertain Promise. *Cardiol Clin*. 2017;35(1):13-30.
- 39
- 40
- 41 47. Patel A, Praveen D, Maharani A, et al. Association of Multifaceted Mobile Technology-Enabled Primary Care Intervention With Cardiovascular Disease Risk Management in Rural Indonesia. *JAMA Cardiol*. 2019;4(10):978-986.
- 42
- 43
- 44 48. Liyanage T, Ninomiya T, Jha V, et al. Worldwide access to treatment for end-stage kidney disease: a systematic review. *The Lancet*. 2015;385(9981):1975-1982.
- 45
- 46
- 47 49. Jafar TH, Ramakrishnan C, John O, et al. Access to CKD Care in Rural Communities of India: a qualitative study exploring the barriers and potential facilitators. *BMC nephrology*. 2020;21(1):26.
- 48
- 49
- 50 50. Langarizadeh M, Moghbeli F, Aliabadi A. Application of Ethics for Providing Telemedicine Services and Information Technology. *Med Arch*. 2017;71(5):351-355.
- 51
- 52
- 53 51. Rinaldi G, Hijazi A, Haghparast-Bidgoli H. Cost and cost-effectiveness of mHealth interventions for the prevention and control of type 2 diabetes mellitus: A systematic review. *Diabetes research and clinical practice*. 2020;162:108084.
- 54
- 55
- 56 52. Pew Research Center. Smartphone Ownership Is Growing Rapidly Around the World, but Not Always Equally.
- 57
- 58
- 59
- 60

- 1  
2  
3  
4  
5  
6  
7  
8  
9  
10  
11  
12  
13  
14  
15  
16  
17  
18  
19  
20  
21  
22  
23  
24  
25  
26  
27  
28  
29  
30  
31  
32  
33  
34  
35  
36  
37  
38  
39  
40  
41  
42  
43  
44  
45  
46  
47  
48  
49  
50  
51  
52  
53  
54  
55  
56  
57  
58  
59  
60
- <https://www.pewresearch.org/global/2019/02/05/smartphone-ownership-is-growing-rapidly-around-the-world-but-not-always-equally/>. Accessed 23 December 2020.
53. Filkins BL, Kim JY, Roberts B, et al. Privacy and security in the era of digital health: what should translational researchers know and do about it? *Am J Transl Res*. 2016;8(3):1560-1580.
54. Kruse CS, Kristof C, Jones B, Mitchell E, Martinez A. Barriers to Electronic Health Record Adoption: a Systematic Literature Review. *Journal of medical systems*. 2016;40(12):252.
55. Fennelly O, Cunningham C, Grogan L, et al. Successfully implementing a national electronic health record: a rapid umbrella review. *International journal of medical informatics*. 2020;144:104281.
56. Safie N, Aljunid S. E-learning initiative capacity building for healthcare workforce of developing countries. *Journal of Computer Science*. 2013;9(5):583.
57. Frenk J, Chen L, Bhutta ZA, et al. Health professionals for a new century: transforming education to strengthen health systems in an interdependent world. *Lancet (London, England)*. 2010;376(9756):1923-1958.
58. Webster P. Virtual health care in the era of COVID-19. *Lancet (London, England)*. 2020;395(10231):1180-1181.
59. Olum R, Atulinda L, Kigozi E, et al. Medical Education and E-Learning During COVID-19 Pandemic: Awareness, Attitudes, Preferences, and Barriers Among Undergraduate Medicine and Nursing Students at Makerere University, Uganda. *J Med Educ Curric Dev*. 2020;7:2382120520973212.
60. Dost S, Hossain A, Shehab M, Abdelwahed A, Al-Nusair L. Perceptions of medical students towards online teaching during the COVID-19 pandemic: a national cross-sectional survey of 2721 UK medical students. *BMJ open*. 2020;10(11):e042378.

**FIGURE LEGENDS**

**Figure 1:** Proportion of mobile-cellular users and internet access across ISN regions

**Figure 2(A – E):** (A) Availability of national EHR system, (B - E) Availability of other electronic health record systems (laboratory information systems, pathology information systems, PACS systems, and pharmacy information systems)

Abbreviations: EHR – electronic health records, PACS - picture archiving and communication system)

**Supplementary Materials:**

**Table S1:** List of participating countries by ISN regions

**Table S2:** mHealth for accessing services

**Figure S1:** National eHealth policies / strategies across ISN regions

**Figure S2:** Funding sources for eHealth by income groups

**Figure S3:** eHealth capacity building

**Figure S4:** Use of e-learning in health sciences across ISN regions

**Figure S5:** Health facilities with EHR in ISN regions

**Figure S6:** Availability of human resources for Health Information Systems (HIS)

**Figure S7:** Legal framework for eHealth across income groups

**Figure S8:** Health care organizations use of social media across ISN regions

**Figure S9:** Policy / strategy governing the use of big data

**Table 1:** Features of participating countries ranked according to ISN regions and World Bank groups

|                                       | Total population of participating countries (millions)* | GNI per capita (PPP Int \$) * | Physician density (per 10,000 population) | Nurse & midwife density (per 10,000 population) | Hospital bed density (per 10,000 population) | Life expectancy at birth (years) | Total health expenditure (% GDP) | ICT Development Index** |
|---------------------------------------|---------------------------------------------------------|-------------------------------|-------------------------------------------|-------------------------------------------------|----------------------------------------------|----------------------------------|----------------------------------|-------------------------|
| <b>Overall (n=125)</b>                | 4,389.9                                                 | 18220 (18722)                 | 1.63 (0.31-3.24)                          | 2.53 (0.74-6.11)                                | 28 (13-49)                                   | 74 (66-78)                       | 6.7 (5.4-8.9)                    | 4.8 (2.9-6.9)           |
| <b>ISN regions:</b>                   |                                                         |                               |                                           |                                                 |                                              |                                  |                                  |                         |
| -Africa (n=33)                        | 600.7                                                   | 4873 (6190)                   | 0.11 (0.06-0.29)                          | 0.68 (0.42-0.91)                                | 13 (5-20)                                    | 60 (57-64)                       | 5.7 (4.4-7.1)                    | 2.3 (1.6-3.7)           |
| -Eastern & Central Europe (n=17)      | 197.2                                                   | 18943 (6815)                  | 2.39 (2.02-3.38)                          | 5.50 (4.16-6.27)                                | 54 (39-66)                                   | 75 (74-77)                       | 7.2 (5.9-8.0)                    | 6.4 (5.8-6.9)           |
| -Latin America & the Caribbean (n=14) | 330.6                                                   | 12952 (5452)                  | 1.48 (1.11-2.10)                          | 1.04 (0.62-1.51)                                | 14 (10-21)                                   | 77 (74-78)                       | 7.3 (6.4-8.8)                    | 4.4 (3.6-6.0)           |
| -Middle East (n=8)                    | 152.3                                                   | 38863 (40229)                 | 1.95 (0.91-2.88)                          | 2.72 (1.87-5.38)                                | 18 (14-18)                                   | 76 (74-78)                       | 5.1 (3.0-7.0)                    | 5.9 (4.7-6.8)           |
| -NIS & Russia (n=11)                  | 278.4                                                   | 11351 (7072)                  | 3.47 (2.53-3.93)                          | 7.11 (5.02-9.04)                                | 52 (40-87)                                   | 69 (69-72)                       | 6.1 (4.5-6.8)                    | 5.3 (5.2-6.4)           |
| -North America (n=4)                  | 359.4                                                   | 32815 (19823)                 | 1.63 (0.79-2.26)                          | 6.42 (2.33-9.55)                                | 28 (23-31)                                   | 77 (73-81)                       | 8.4 (5.7-14.0)                   | 6.6 (4.9-7.9)           |
| -North and East Asia (n=4)            | 1,548.2                                                 | 19430 (15835)                 | 2.57 (1.90-3.06)                          | 3.87 (2.64-7.80)                                | 95 (50-135)                                  | 73 (69-80)                       | 6.0 (5.6-10.3)                   | 4.8 (4.5-8.3)           |
| -Oceania & South East Asia (n=10)     | 276.2                                                   | 20210 (24142)                 | 1.17 (0.18-1.95)                          | 3.50 (1.11-6.00)                                | 23 (14-31)                                   | 74 (67-82)                       | 5.3 (4.0-9.4)                    | 4.0 (2.8-7.9)           |
| -South Asia (n=5)                     | 370.4                                                   | 5366 (3238)                   | 0.36 (0.27-0.83)                          | 0.57 (0.50-0.98)                                | 6 (4-18)                                     | 68 (66-71)                       | 3.7 (3.6-8.1)                    | 2.3 (2.2-3.1)           |
| -Western Europe (n=19)                | 276.6                                                   | 40262 (11395)                 | 3.49 (3.15-4.10)                          | 8.80 (4.96-15.20)                               | 46 (33-56)                                   | 81 (81-82)                       | 9.4 (8.9-10.6)                   | 7.9 (7.5-8.5)           |
| <b>World Bank Groups:</b>             |                                                         |                               |                                           |                                                 |                                              |                                  |                                  |                         |
| -Low income (n=19)                    | 353.6                                                   | 1390 (429)                    | 0.07 (0.04-0.12)                          | 0.53 (0.26-0.77)                                | 10 (4-17)                                    | 59 (56-62)                       | 6.2 (4.8-8.1)                    | 1.6 (1.3-1.9)           |
| -Lower-middle income (n=30)           | 899.9                                                   | 4816 (2102)                   | 0.38 (0.17-1.60)                          | 0.90 (0.62-3.71)                                | 14 (7-31)                                    | 69 (64-72)                       | 5.8 (4.2-6.9)                    | 3.1 (2.4-4.0)           |
| -Upper-middle income (n=34)           | 2,200.5                                                 | 14547 (4236)                  | 1.49 (1.15-2.56)                          | 3.28 (1.41-5.41)                                | 27 (17-54)                                   | 74 (72-76)                       | 6.3 (5.4-7.2)                    | 4.7 (4.4-5.9)           |
| -High income (n=42)                   | 936.0                                                   | 38213 (19296)                 | 3.27 (2.43-3.78)                          | 6.27 (4.46-10.86)                               | 38 (32-56)                                   | 81 (77-82)                       | 8.9 (6.7-9.7)                    | 7.5 (6.8-8.1)           |

\* - data expressed as mean (SD); all other data represent median and interquartile ranges (IQR)

§ - (per 10,000 population)

\*\* - Data from the World Bank (2015)

GNI – gross national income; PPP – purchasing power parity; GDP – gross domestic product; ICT – Information and communications technology

**Table 2:** Remote patient monitoring [n (%)]

|                                       | Health system level |          |          |              |                           |             | Programme type |        |             |             |
|---------------------------------------|---------------------|----------|----------|--------------|---------------------------|-------------|----------------|--------|-------------|-------------|
|                                       | International       | Regional | National | Intermediate | Local or peripheral level | No response | Informal       | Pilot  | Established | No response |
| <b>Overall (n=125)</b>                | 4(3)                | 4(3)     | 19(15)   | 21(17)       | 28(22)                    | 65(52)      | 12(10)         | 38(30) | 15(12)      | 67(54)      |
| <b>ISN regions:</b>                   |                     |          |          |              |                           |             |                |        |             |             |
| -Africa (n=33)                        | 2(6)                | 0(0)     | 3(9)     | 2(6)         | 4(12)                     | 25(76)      | 2(6)           | 5(15)  | 1(3)        | 25(76)      |
| -Eastern & Central Europe (n=17)      | 1(6)                | 1(6)     | 3(18)    | 2(12)        | 5(29)                     | 6(35)       | 2(12)          | 9(53)  | 0(0)        | 6(35)       |
| -Latin America & the Caribbean (n=14) | 0(0)                | 0(0)     | 1(7)     | 1(7)         | 4(29)                     | 9(64)       | 1(7)           | 4(29)  | 1(7)        | 9(64)       |
| -Middle East (n=8)                    | 0(0)                | 0(0)     | 0(0)     | 2(25)        | 1(13)                     | 5(63)       | 1(13)          | 1(13)  | 1(13)       | 5(63)       |
| -NIS & Russia (n=11)                  | 0(0)                | 1(9)     | 2(18)    | 3(27)        | 2(18)                     | 5(45)       | 3(27)          | 3(27)  | 1(9)        | 5(45)       |
| -North America (n=4)                  | 0(0)                | 0(0)     | 0(0)     | 2(50)        | 1(25)                     | 2(50)       | 0(0)           | 1(25)  | 1(25)       | 3(75)       |
| -North and East Asia (n=4)            | 0(0)                | 0(0)     | 2(50)    | 0(0)         | 1(25)                     | 1(25)       | 0(0)           | 1(25)  | 1(25)       | 2(50)       |
| -Oceania & South East Asia (n=10)     | 0(0)                | 0(0)     | 0(0)     | 0(0)         | 3(30)                     | 7(70)       | 0(0)           | 3(30)  | 0(0)        | 7(70)       |
| -South Asia (n=5)                     | 1(20)               | 0(0)     | 1(20)    | 1(20)        | 0(0)                      | 2(40)       | 0(0)           | 2(40)  | 1(20)       | 2(40)       |
| -Western Europe (n=19)                | 0(0)                | 2(11)    | 7(37)    | 8(42)        | 7(37)                     | 3(16)       | 3(16)          | 9(47)  | 8(42)       | 3(16)       |
| <b>World Bank Groups:</b>             |                     |          |          |              |                           |             |                |        |             |             |
| -Low income (n=19)                    | 0(0)                | 0(0)     | 3(16)    | 1(5)         | 2(11)                     | 13(68)      | 1(5)           | 3(16)  | 1(5)        | 14(74)      |
| -Lower-middle income (n=30)           | 2(7)                | 1(3)     | 3(10)    | 3(10)        | 3(10)                     | 21(70)      | 3(10)          | 6(20)  | 1(3)        | 21(70)      |
| -Upper-middle income (n=34)           | 0(0)                | 0(0)     | 3(9)     | 4(12)        | 6(18)                     | 22(65)      | 2(6)           | 9(26)  | 2(6)        | 22(65)      |
| -High income (n=42)                   | 2(5)                | 3(7)     | 10(24)   | 13(31)       | 17(40)                    | 9(21)       | 6(14)          | 20(48) | 11(26)      | 10(24)      |

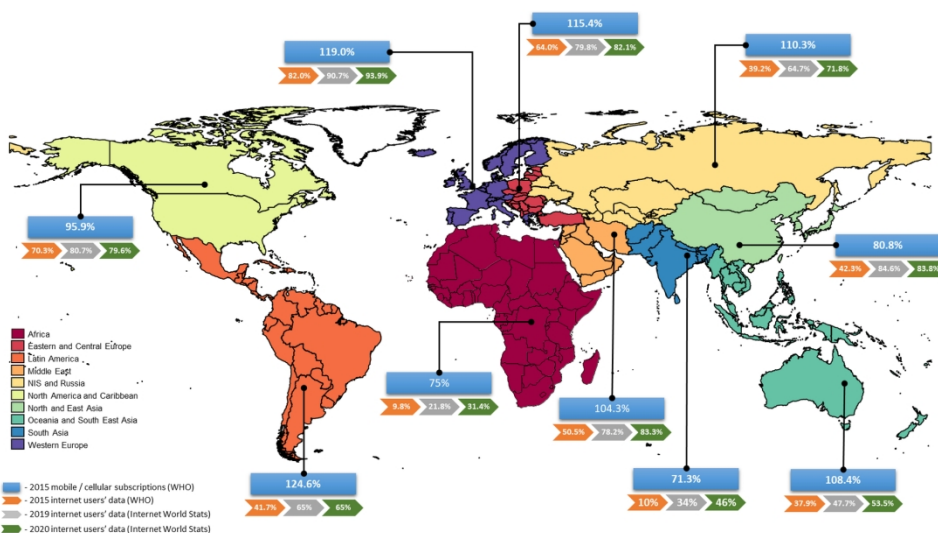

Figure 1

84x47mm (600 x 600 DPI)

1  
2  
3  
4  
5  
6  
7  
8  
9  
10  
11  
12  
13  
14  
15  
16  
17  
18  
19  
20  
21  
22  
23  
24  
25  
26  
27  
28  
29  
30  
31  
32  
33  
34  
35  
36  
37  
38  
39  
40  
41  
42  
43  
44  
45  
46  
47  
48  
49  
50  
51  
52  
53  
54  
55  
56  
57  
58  
59  
60

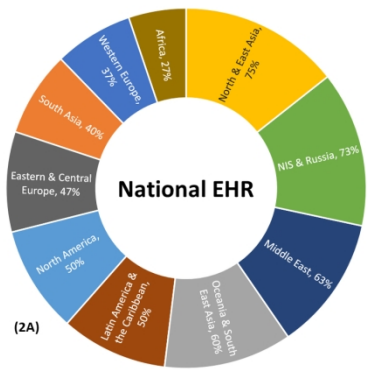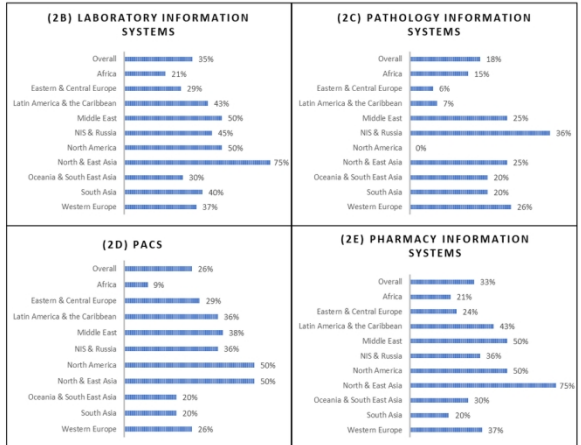

Figure 2

84x47mm (600 x 600 DPI)

1  
2  
3 **Supplementary Materials:**  
4  
5

6 **Supplementary Table S1: List of participating countries by ISN regions**  
7

|    | Africa                   | EC Europe         | Latin America          | Middle East        | NIS & Russia         | North America      | North East Asia     | OSEA                      | South Asia  | Western Europe |         |
|----|--------------------------|-------------------|------------------------|--------------------|----------------------|--------------------|---------------------|---------------------------|-------------|----------------|---------|
| 10 | Benin                    | Cabo Verde        | Moldova                | El Salvador        | Syrian Arab Republic | Armenia            | Jamaica             | Korea, Dem. People's Rep. | Cambodia    | Afghanistan    | Austria |
| 11 | Burkina Faso             | Cote d'Ivoire     | Albania                | Guatemala          | Iran, Islamic Rep.   | Georgia            | Canada              | China                     | Kiribati    | Bangladesh     | Belgium |
| 12 | Burundi                  | Ghana             | Bosnia and Herzegovina | Honduras           | Iraq                 | Kyrgyz Republic    | Trinidad and Tobago | Mongolia                  | Lao PDR     | Bhutan         | Denmark |
| 13 | Central African Republic | Kenya             | Bulgaria               | Colombia           | Jordan               | Tajikistan         | United States       | Japan                     | Philippines | Pakistan       | Finland |
| 14 | Comoros                  | Lesotho           | Montenegro             | Costa Rica         | Lebanon              | Ukraine            |                     | Timor-Leste               | Maldives    | Greece         |         |
| 15 | Ethiopia                 | Mauritania        | Romania                | Cuba               | Bahrain              | Uzbekistan         |                     | Vietnam                   |             | Iceland        |         |
| 16 | Gambia, The              | Morocco           | Serbia                 | Dominican Republic | Oman                 | Azerbaijan         |                     | Malaysia                  |             | Ireland        |         |
| 17 | Guinea-Bissau            | Senegal           | Turkey                 | Mexico             | Qatar                | Belarus            |                     | Australia                 |             | Israel         |         |
| 18 | Madagascar               | Sudan             | Croatia                | Panama             |                      | Kazakhstan         |                     | New Zealand               |             | Italy          |         |
| 19 | Malawi                   | Zambia            | Cyprus                 | Paraguay           |                      | Russian Federation |                     | Singapore                 |             | Luxembourg     |         |
| 20 | Mali                     | Algeria           | Czech Republic         | Peru               |                      | Turkmenistan       |                     |                           |             | Malta          |         |
| 21 | Niger                    | Botswana          | Estonia                | Argentina          |                      |                    |                     |                           |             | Netherlands    |         |
| 22 | Rwanda                   | Equatorial Guinea | Hungary                | Chile              |                      |                    |                     |                           |             | Norway         |         |
| 23 | Somalia                  | South Africa      | Latvia                 | Uruguay            |                      |                    |                     |                           |             | Portugal       |         |
| 24 | South Sudan              | Tunisia           | Lithuania              |                    |                      |                    |                     |                           |             | San Marino     |         |
| 25 | Uganda                   | Seychelles        | Poland                 |                    |                      |                    |                     |                           |             | Spain          |         |
| 26 | Zimbabwe                 |                   | Slovenia               |                    |                      |                    |                     |                           |             | Sweden         |         |
| 27 |                          |                   |                        |                    |                      |                    |                     |                           |             | Switzerland    |         |
| 28 |                          |                   |                        |                    |                      |                    |                     |                           |             | United Kingdom |         |



**Supplementary Table S2: mHealth for accessing services [n (%)]**

|                                | Toll-free emergency |          |          |              |                           |             | Appointment reminders |          |          |              |                           |             | Treatment adherence |          |          |              |                           |             |
|--------------------------------|---------------------|----------|----------|--------------|---------------------------|-------------|-----------------------|----------|----------|--------------|---------------------------|-------------|---------------------|----------|----------|--------------|---------------------------|-------------|
|                                | International       | Regional | National | Intermediate | Local or peripheral level | No Response | International         | Regional | National | Intermediate | Local or peripheral level | No Response | International       | Regional | National | Intermediate | Local or peripheral level | No Response |
| <b>Overall</b>                 | 3(2)                | 9(7)     | 75(60)   | 20(16)       | 18(14)                    | 31(25)      | 0(0)                  | 8(6)     | 39(31)   | 22(18)       | 38(30)                    | 39(31)      | 1(1)                | 7(6)     | 15(12)   | 23(18)       | 35(28)                    | 65(52)      |
| <b>ISN regions:</b>            |                     |          |          |              |                           |             |                       |          |          |              |                           |             |                     |          |          |              |                           |             |
| -Africa                        | 0(0)                | 1(3)     | 16(48)   | 6(18)        | 4(12)                     | 13(39)      | 0(0)                  | 4(12)    | 12(36)   | 5(15)        | 8(24)                     | 13(39)      | 1(3)                | 4(12)    | 6(18)    | 5(15)        | 9(27)                     | 19(58)      |
| -Eastern & Central Europe      | 0(0)                | 0(0)     | 9(53)    | 1(6)         | 1(6)                      | 6(35)       | 0(0)                  | 0(0)     | 6(35)    | 0(0)         | 6(35)                     | 5(29)       | 0(0)                | 0(0)     | 2(12)    | 3(18)        | 4(24)                     | 8(47)       |
| -Latin America & the Caribbean | 0(0)                | 1(7)     | 11(79)   | 4(29)        | 4(29)                     | 0(0)        | 0(0)                  | 1(7)     | 7(50)    | 2(14)        | 3(21)                     | 3(21)       | 0(0)                | 0(0)     | 1(7)     | 4(29)        | 3(21)                     | 7(50)       |
| -Middle East                   | 0(0)                | 0(0)     | 6(75)    | 0(0)         | 1(13)                     | 1(13)       | 0(0)                  | 0(0)     | 4(50)    | 3(38)        | 1(13)                     | 1(13)       | 0(0)                | 0(0)     | 0(0)     | 1(13)        | 0(0)                      | 7(88)       |
| -NIS & Russia                  | 0(0)                | 3(27)    | 5(45)    | 3(27)        | 3(27)                     | 2(18)       | 0(0)                  | 1(9)     | 1(9)     | 1(9)         | 4(36)                     | 4(36)       | 0(0)                | 1(9)     | 1(9)     | 1(9)         | 4(36)                     | 5(45)       |
| -North America                 | 0(0)                | 0(0)     | 4(100)   | 1(25)        | 1(25)                     | 0(0)        | 0(0)                  | 0(0)     | 1(25)    | 2(50)        | 2(50)                     | 2(50)       | 0(0)                | 0(0)     | 0(0)     | 2(50)        | 2(50)                     | 1(25)       |
| -North and East Asia           | 0(0)                | 0(0)     | 2(50)    | 2(50)        | 1(25)                     | 1(25)       | 0(0)                  | 0(0)     | 0(0)     | 3(75)        | 1(25)                     | 1(25)       | 0(0)                | 0(0)     | 0(0)     | 0(0)         | 1(25)                     | 3(75)       |
| -Oceania & South East Asia     | 1(10)               | 1(10)    | 8(80)    | 1(10)        | 2(20)                     | 2(20)       | 0(0)                  | 0(0)     | 2(20)    | 5(50)        | 3(30)                     | 4(40)       | 0(0)                | 0(0)     | 1(10)    | 3(30)        | 4(40)                     | 5(50)       |
| -South Asia                    | 0(0)                | 0(0)     | 1(20)    | 1(20)        | 0(0)                      | 3(60)       | 0(0)                  | 0(0)     | 1(20)    | 2(40)        | 2(40)                     | 2(40)       | 0(0)                | 1(20)    | 2(40)    | 2(40)        | 1(20)                     | 2(40)       |
| -Western Europe                | 2(11)               | 3(16)    | 13(68)   | 1(5)         | 1(5)                      | 3(16)       | 0(0)                  | 2(11)    | 6(32)    | 3(16)        | 6(32)                     | 4(21)       | 0(0)                | 1(5)     | 2(11)    | 2(11)        | 7(37)                     | 8(42)       |
| <b>World Bank Groups:</b>      |                     |          |          |              |                           |             |                       |          |          |              |                           |             |                     |          |          |              |                           |             |
| -Low income                    | 0(0)                | 1(5)     | 8(42)    | 3(16)        | 2(11)                     | 9(47)       | 0(0)                  | 2(11)    | 5(26)    | 4(21)        | 6(32)                     | 7(37)       | 0(0)                | 2(11)    | 4(21)    | 4(21)        | 4(21)                     | 11(58)      |
| -Lower-middle income           | 1(3)                | 3(10)    | 18(60)   | 5(17)        | 6(20)                     | 6(20)       | 0(0)                  | 2(7)     | 12(40)   | 6(20)        | 8(27)                     | 11(37)      | 1(3)                | 2(7)     | 5(17)    | 5(17)        | 9(30)                     | 17(57)      |
| -Upper-middle income           | 0(0)                | 0(0)     | 17(50)   | 8(24)        | 6(18)                     | 10(29)      | 0(0)                  | 1(3)     | 8(24)    | 5(15)        | 8(24)                     | 14(41)      | 0(0)                | 2(6)     | 3(9)     | 3(9)         | 8(24)                     | 20(59)      |
| -High income                   | 2(5)                | 5(12)    | 32(76)   | 4(10)        | 4(10)                     | 6(14)       | 0(0)                  | 3(7)     | 14(33)   | 7(17)        | 16(38)                    | 7(17)       | 0(0)                | 1(2)     | 3(7)     | 11(26)       | 14(33)                    | 17(40)      |

**Figure S1:** National eHealth policies / strategies across ISN regions

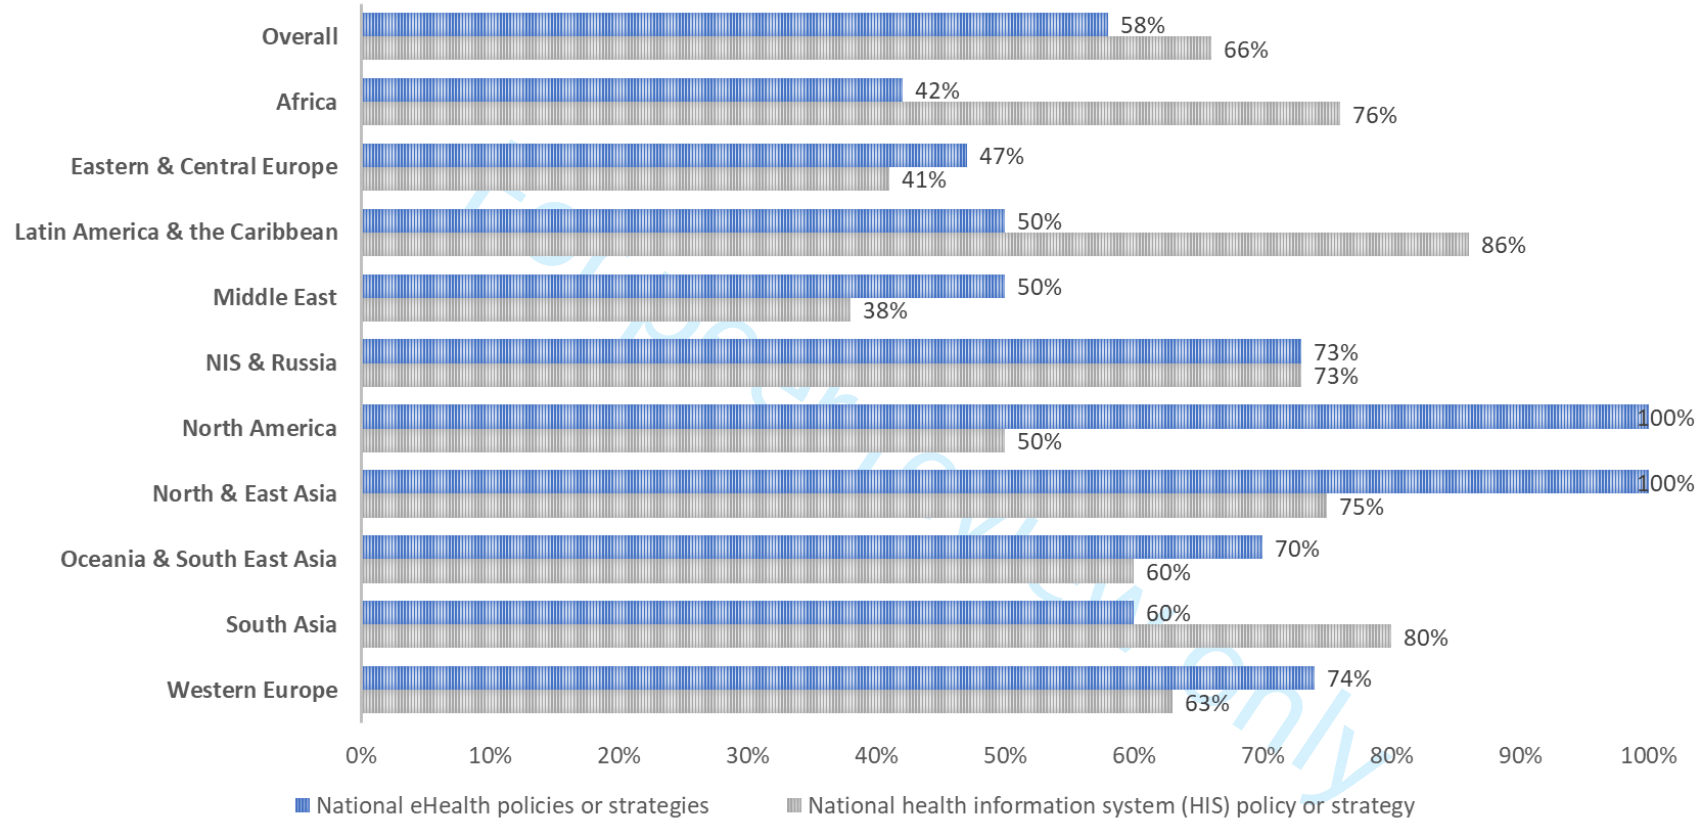

**Figure S2:** Funding sources for eHealth by income groups

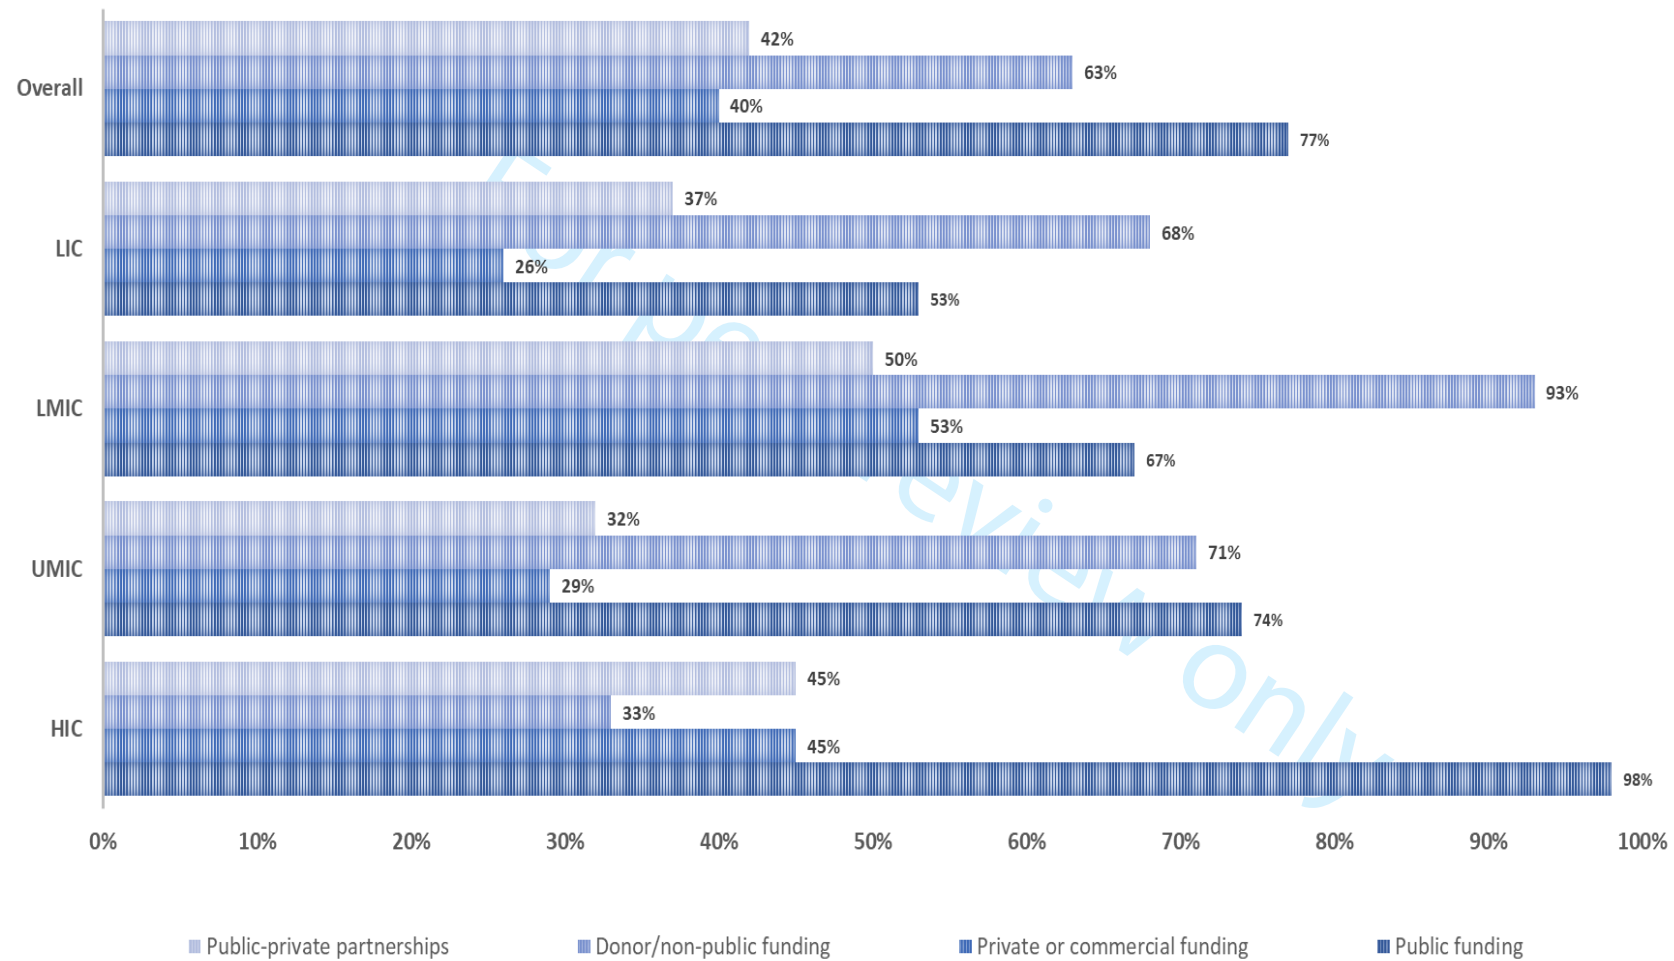

**Figure S3: eHealth capacity building**

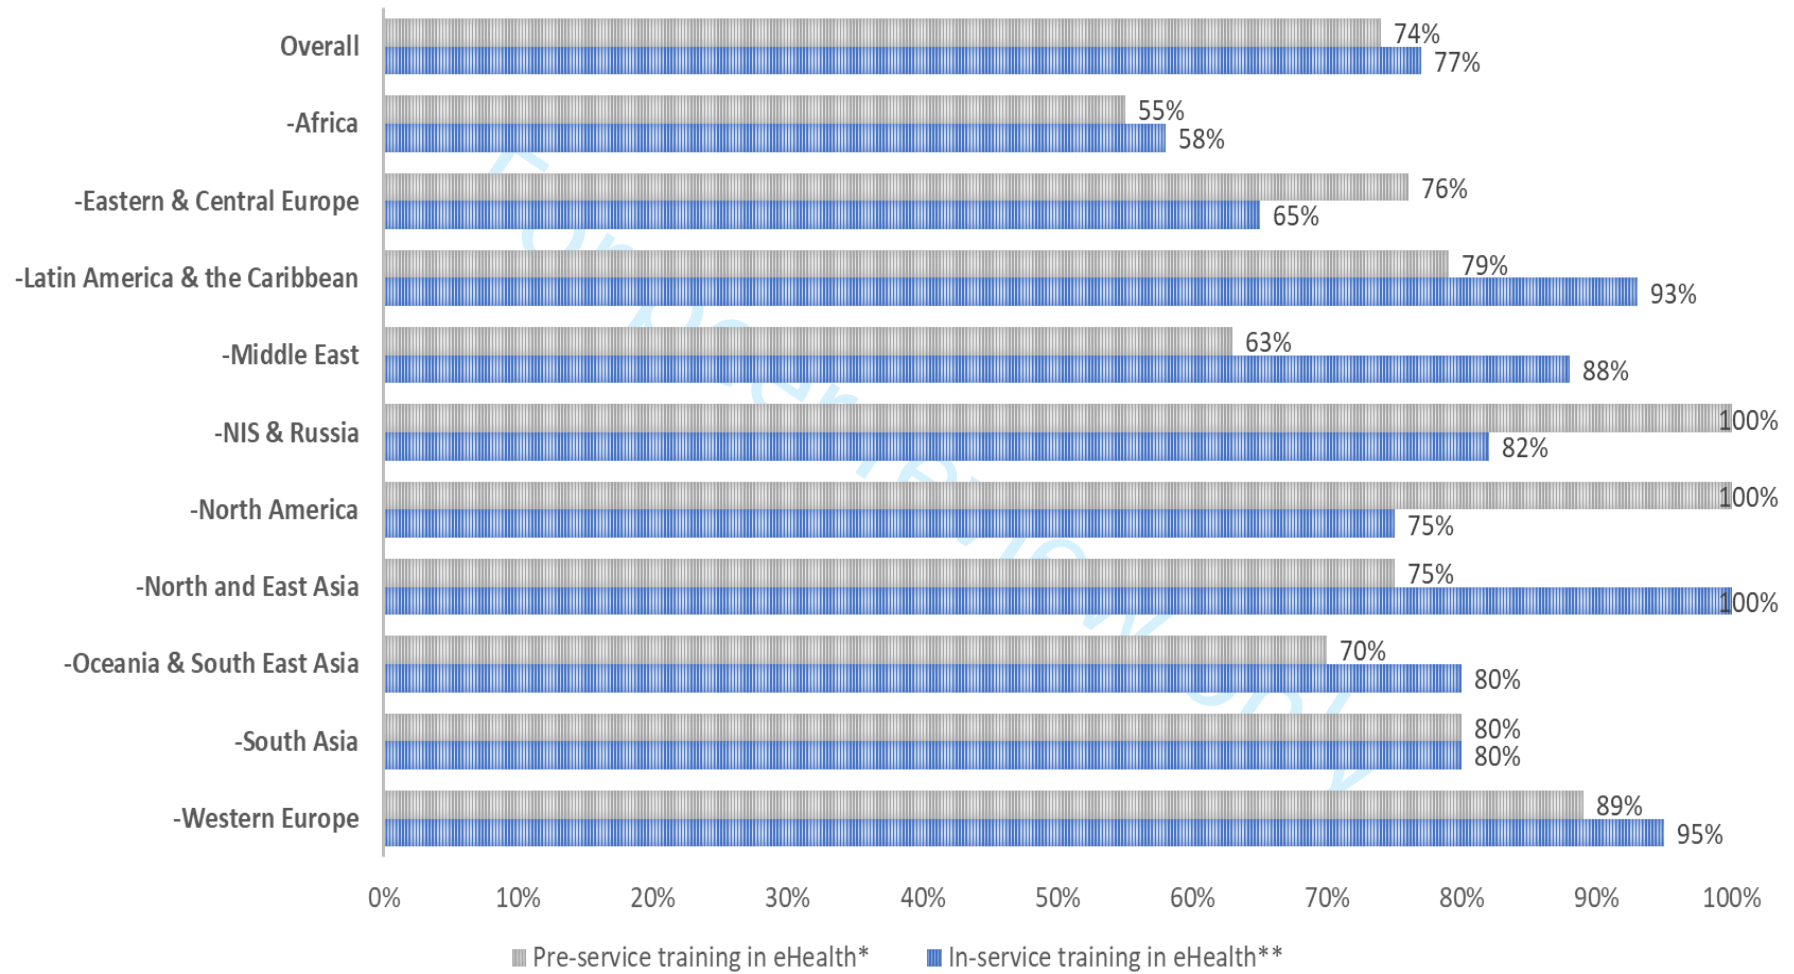

**Figure S4:** Use of e-learning in health sciences across ISN regions

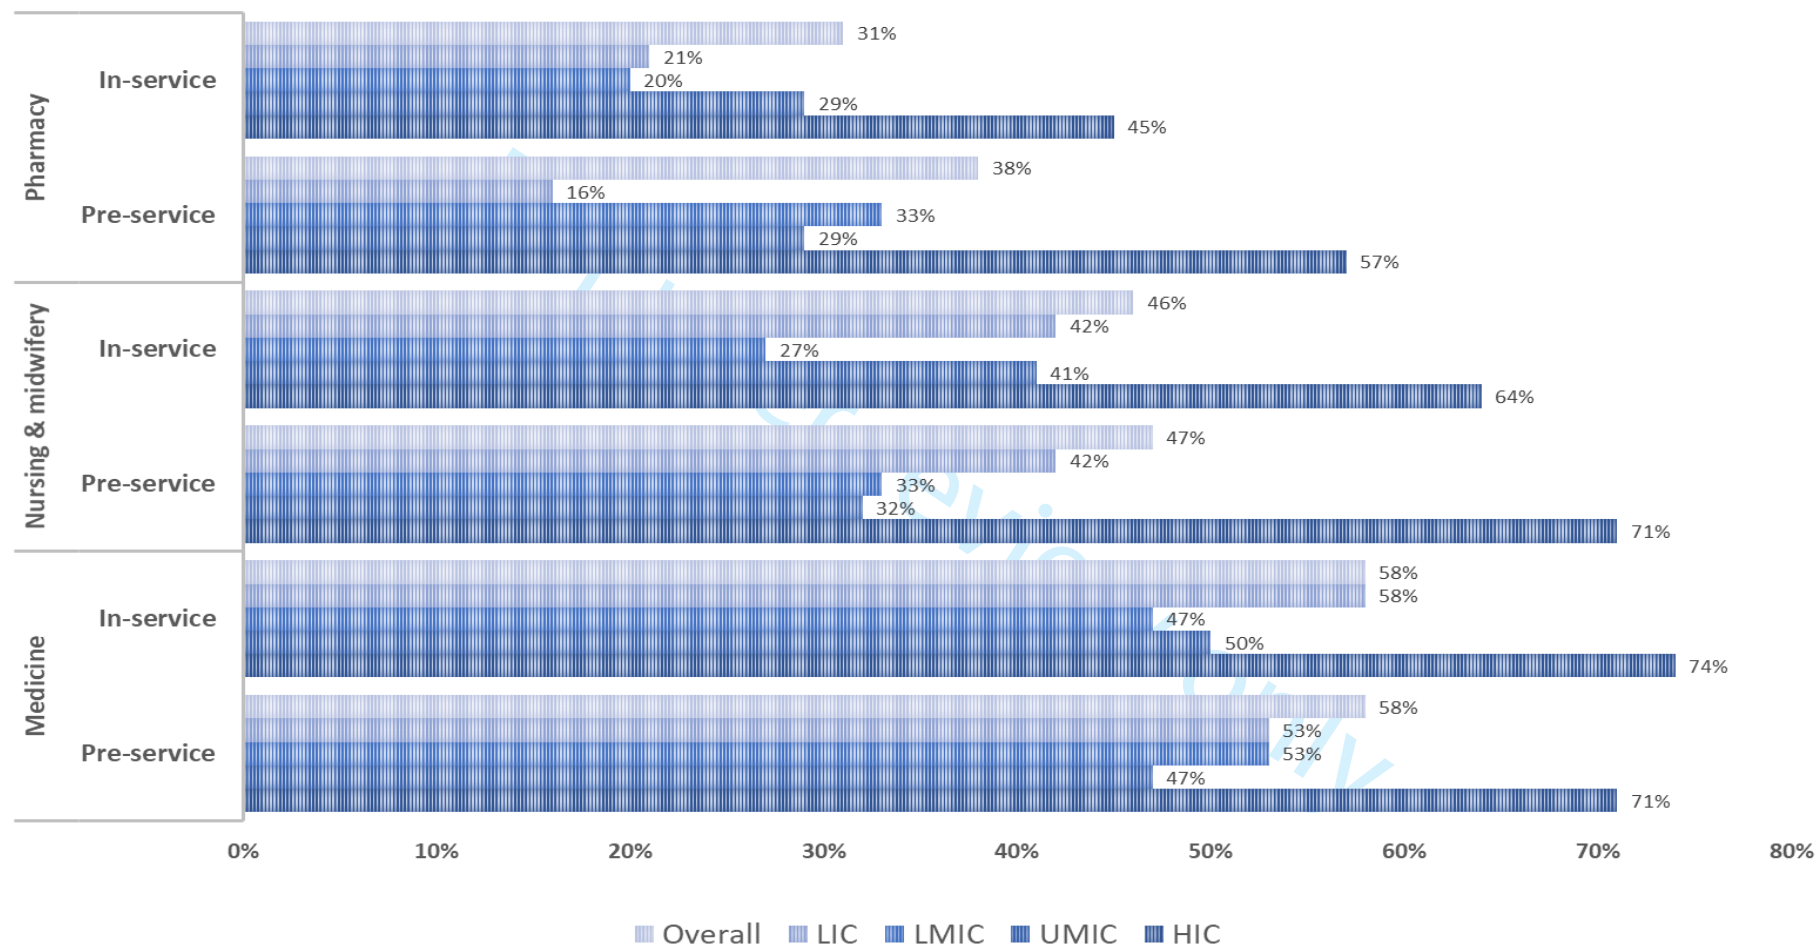

**Figure S5: Health facilities with EHR in ISN regions**

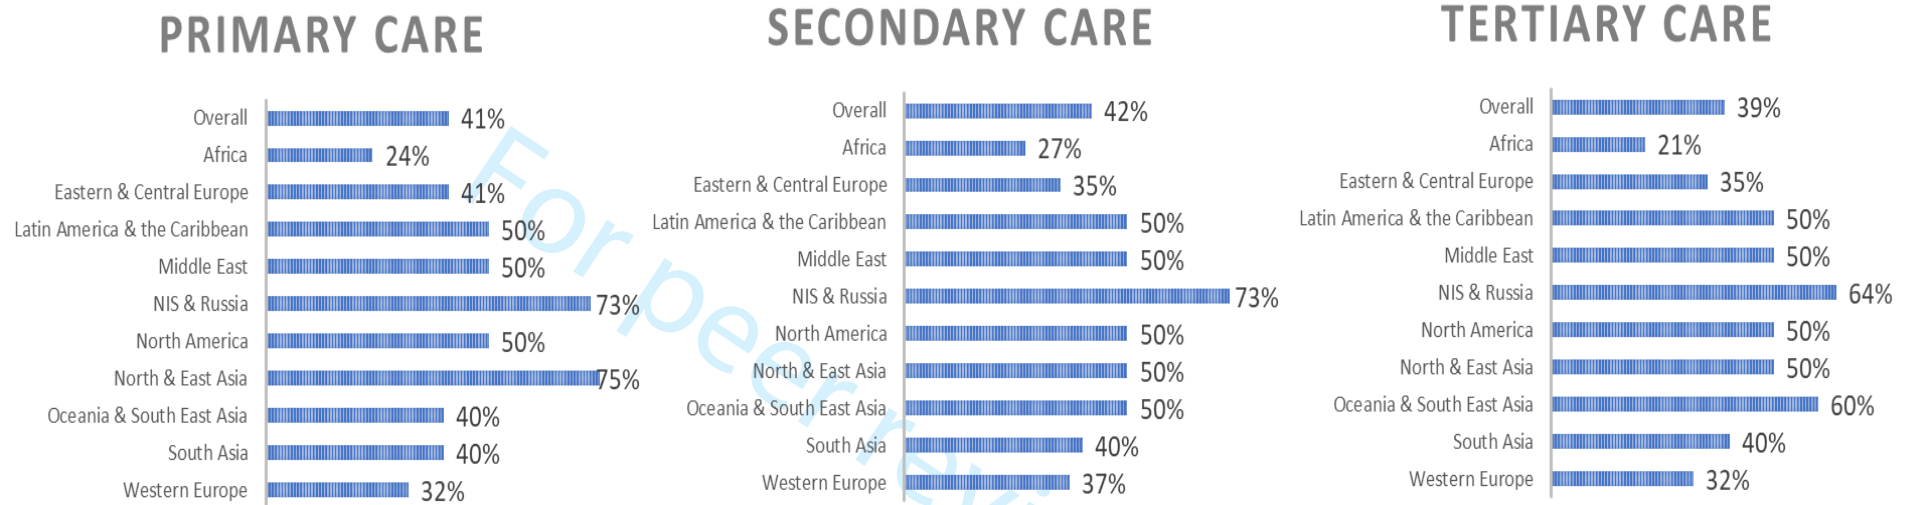

**Figure S6:** Availability of human resources for Health Information Systems (HIS)

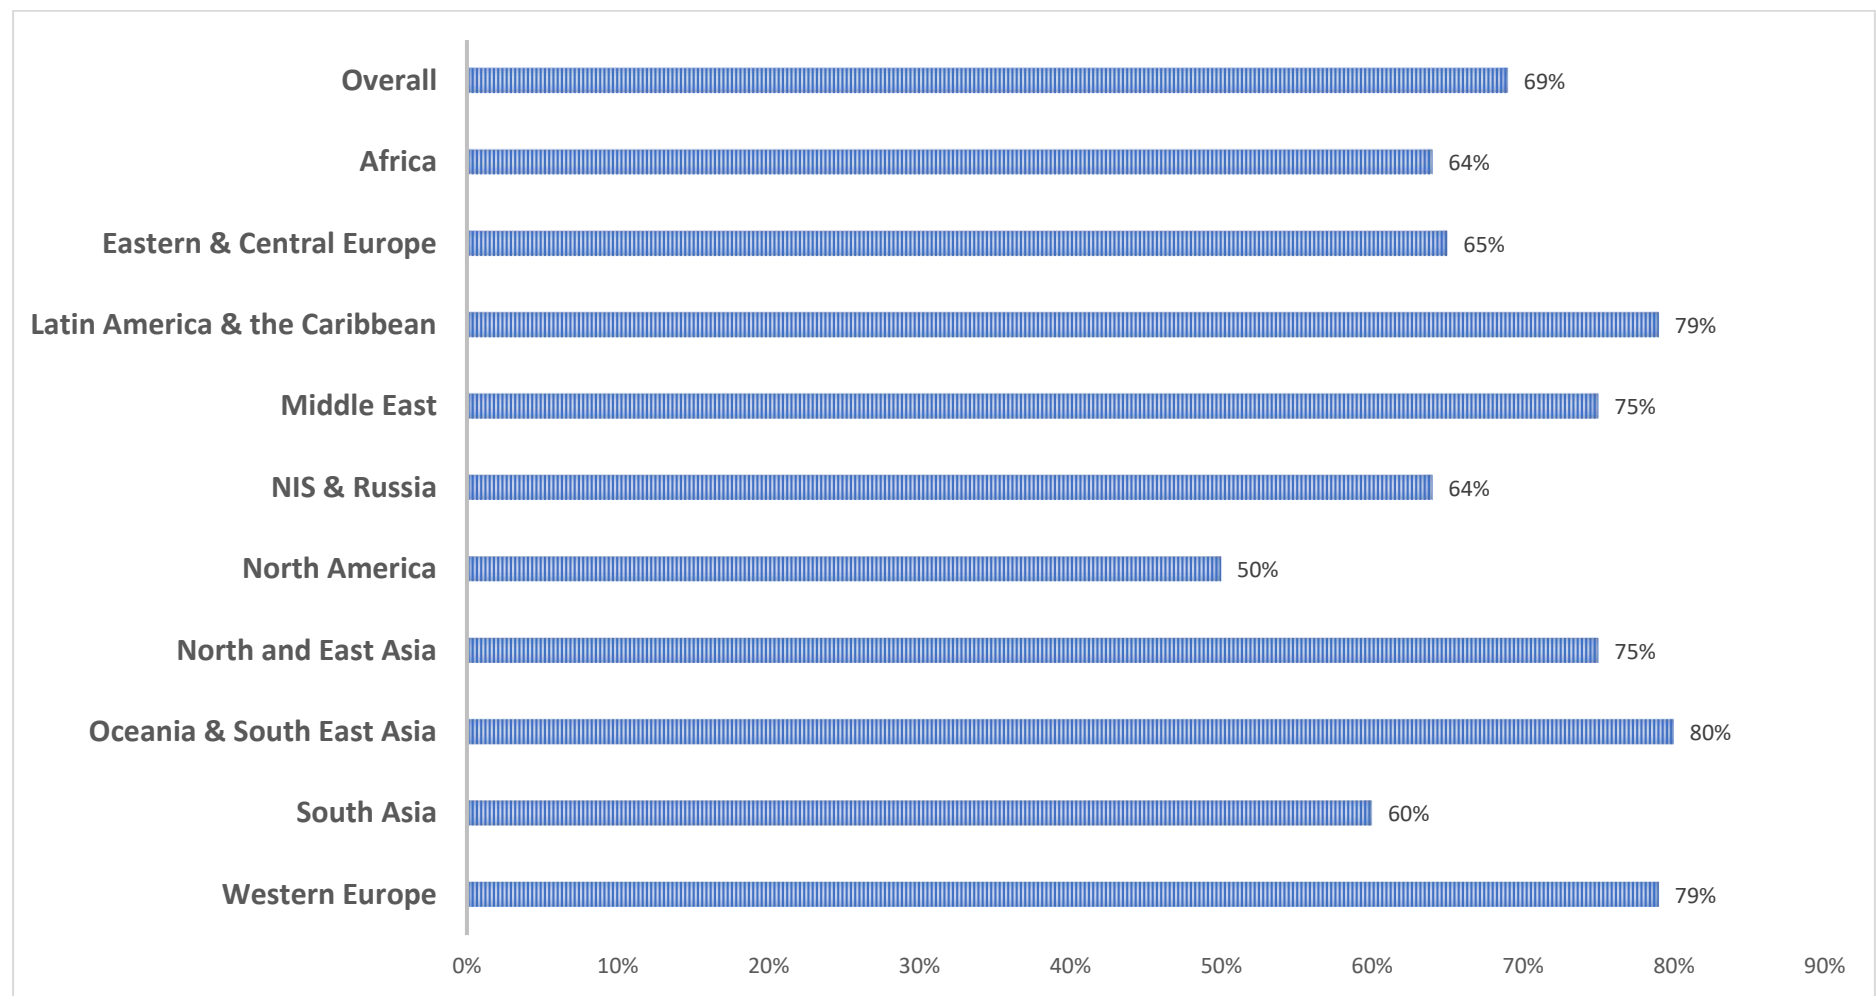

**Figure S7:** Legal framework for eHealth across income groups

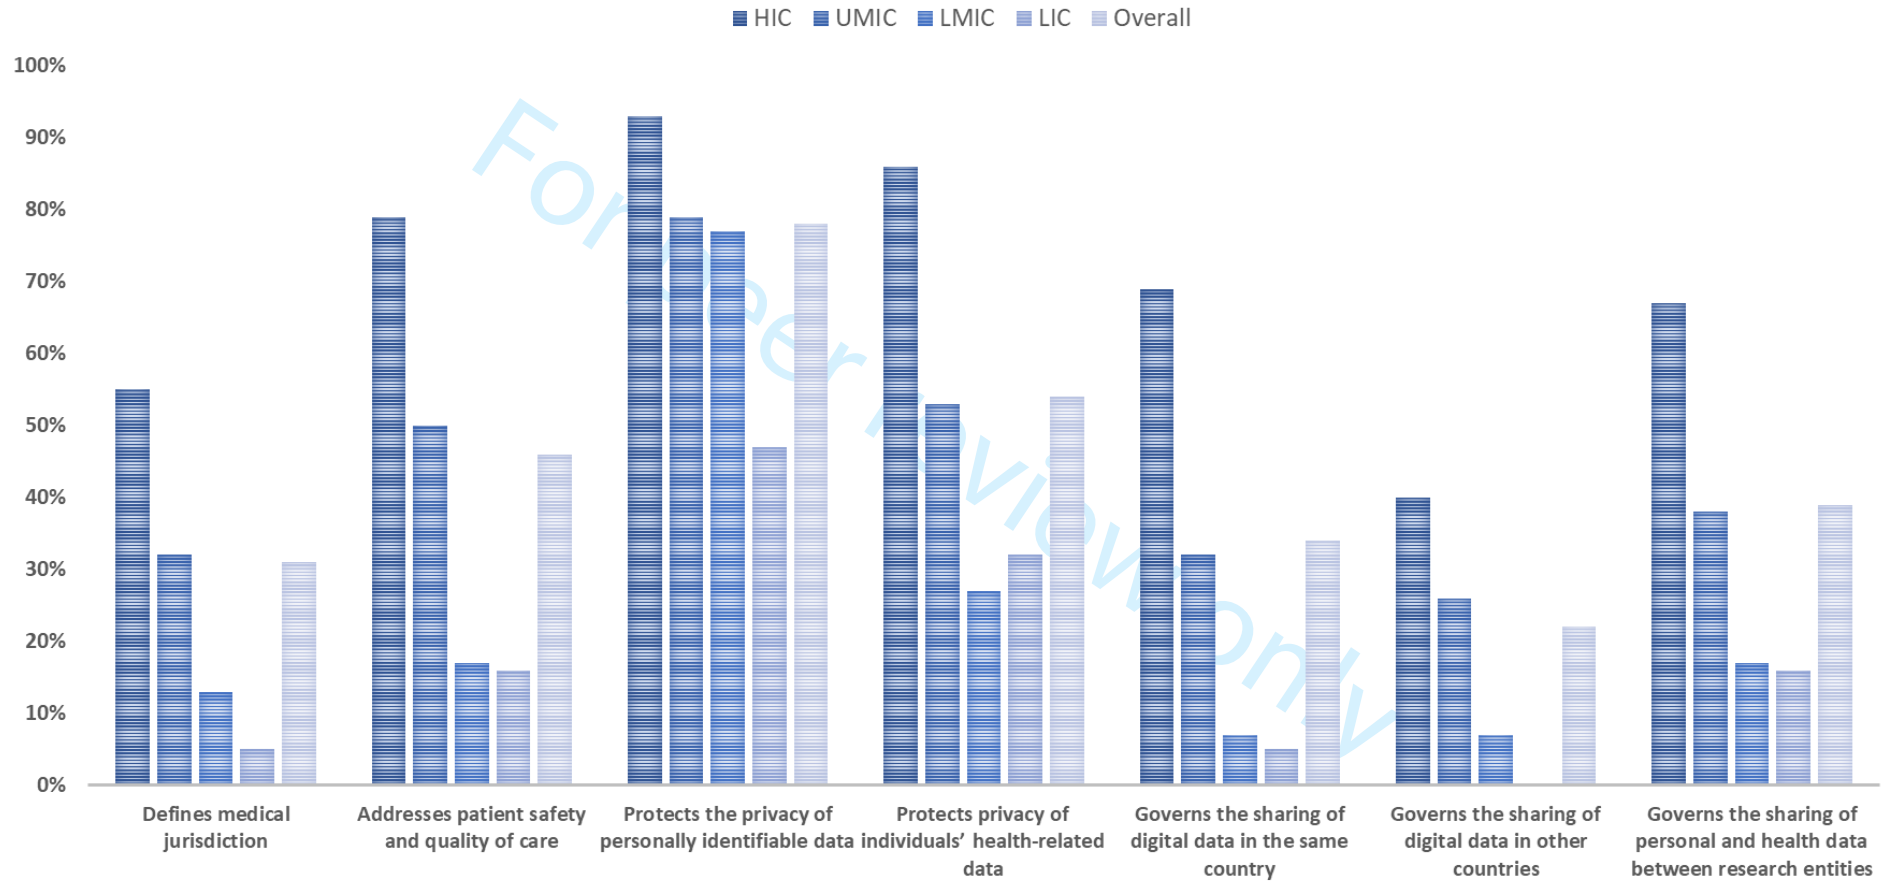



**Figure S8:** Health care organizations use of social media across ISN regions

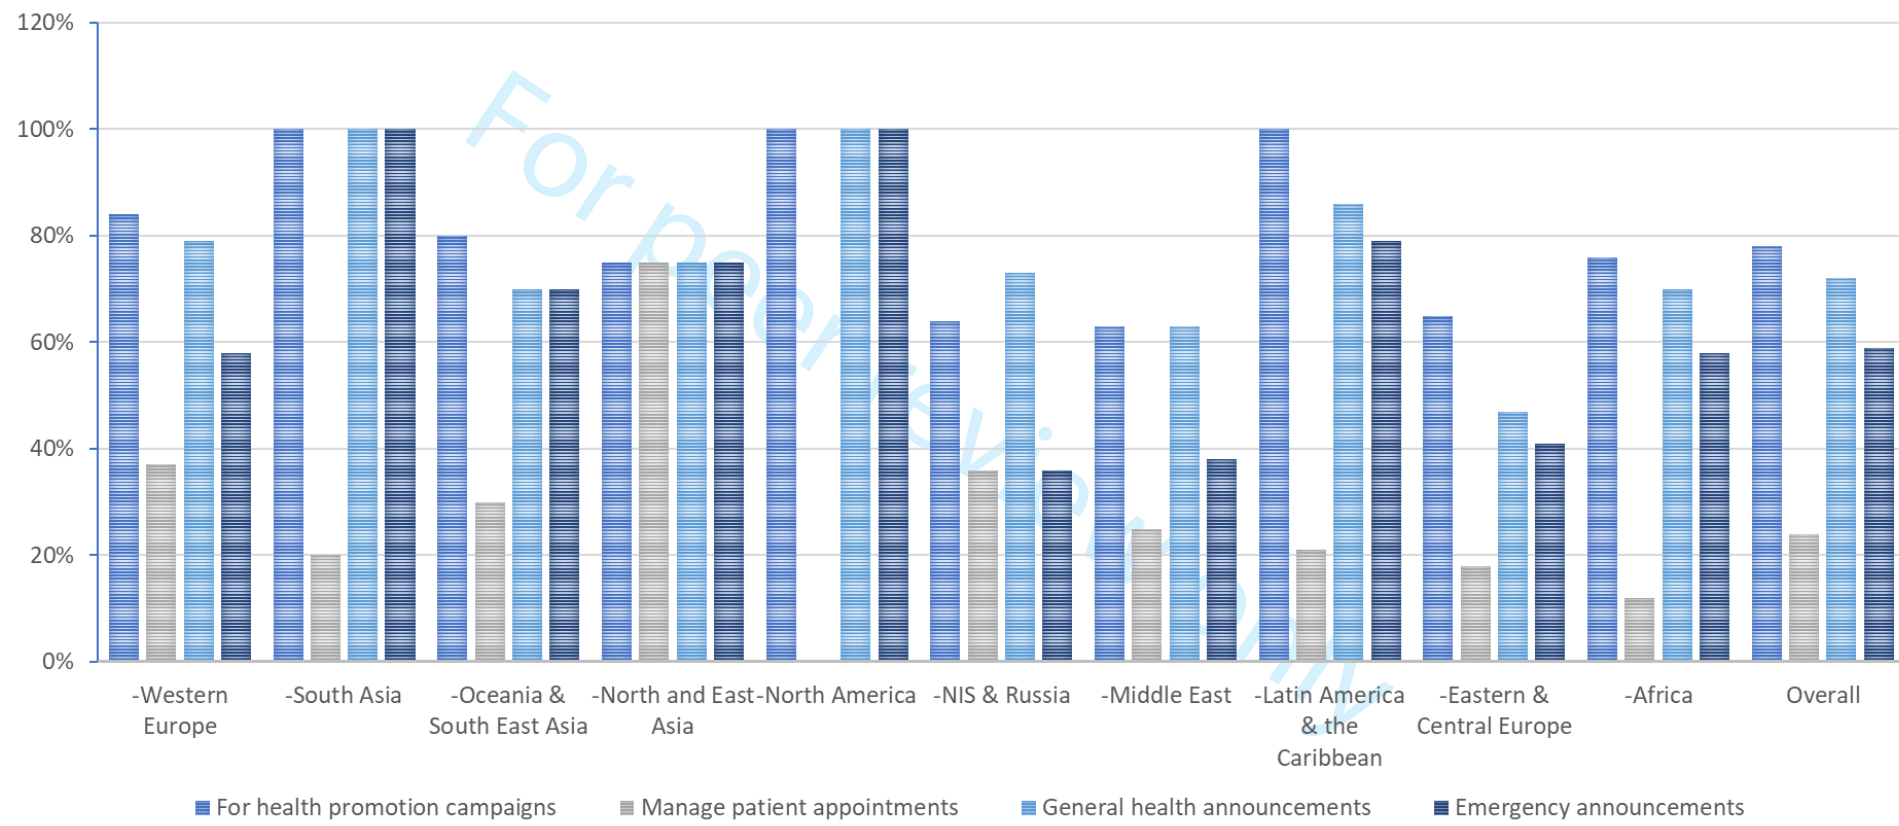

**Figure S9:** Policy / strategy governing the use of big data

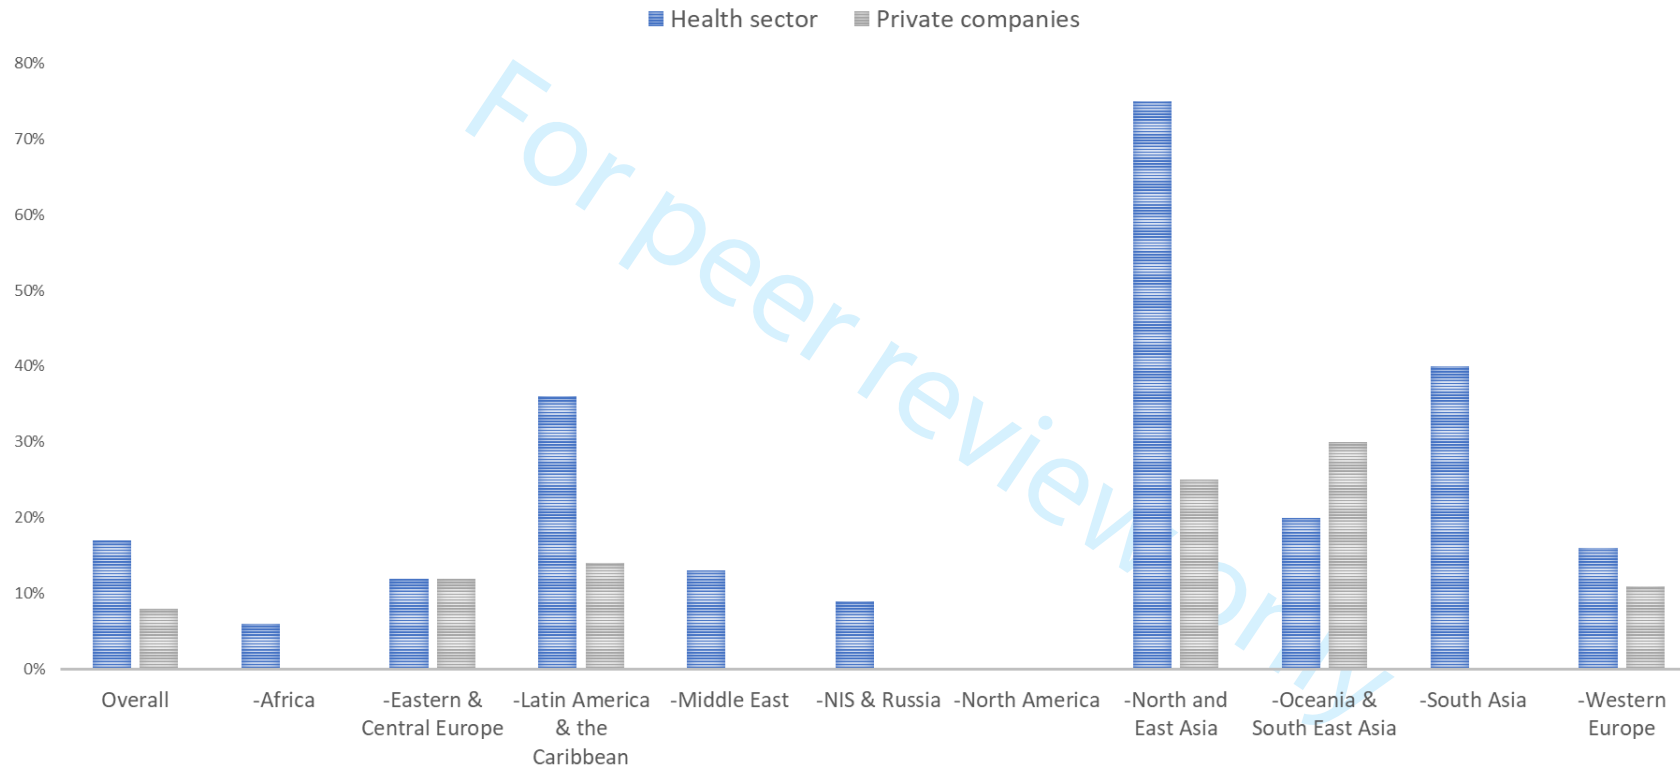

# BMJ Open

## Global Status of Infrastructure and Opportunities for eHealth: Implications for Kidney Care Delivery in Low-income and Lower-Middle-Income Countries

|                                 |                                                                                                                                                                                                                                                                                                                                                                                                                                                                                                                                                                                                                                                                                                                                                                                                                                                                                                                                                                                                                                                                                                                                                                                                                                                                                                                                                                                                                                           |
|---------------------------------|-------------------------------------------------------------------------------------------------------------------------------------------------------------------------------------------------------------------------------------------------------------------------------------------------------------------------------------------------------------------------------------------------------------------------------------------------------------------------------------------------------------------------------------------------------------------------------------------------------------------------------------------------------------------------------------------------------------------------------------------------------------------------------------------------------------------------------------------------------------------------------------------------------------------------------------------------------------------------------------------------------------------------------------------------------------------------------------------------------------------------------------------------------------------------------------------------------------------------------------------------------------------------------------------------------------------------------------------------------------------------------------------------------------------------------------------|
| Journal:                        | <i>BMJ Open</i>                                                                                                                                                                                                                                                                                                                                                                                                                                                                                                                                                                                                                                                                                                                                                                                                                                                                                                                                                                                                                                                                                                                                                                                                                                                                                                                                                                                                                           |
| Manuscript ID                   | bmjopen-2021-055658.R1                                                                                                                                                                                                                                                                                                                                                                                                                                                                                                                                                                                                                                                                                                                                                                                                                                                                                                                                                                                                                                                                                                                                                                                                                                                                                                                                                                                                                    |
| Article Type:                   | Original research                                                                                                                                                                                                                                                                                                                                                                                                                                                                                                                                                                                                                                                                                                                                                                                                                                                                                                                                                                                                                                                                                                                                                                                                                                                                                                                                                                                                                         |
| Date Submitted by the Author:   | 09-Dec-2021                                                                                                                                                                                                                                                                                                                                                                                                                                                                                                                                                                                                                                                                                                                                                                                                                                                                                                                                                                                                                                                                                                                                                                                                                                                                                                                                                                                                                               |
| Complete List of Authors:       | Okpechi, Ikechi G ; University of Cape Town, Medicine<br>Muneer, Shezel; University of Alberta, Department of Medicine<br>Ye, Feng; University of Alberta, Department of Medicine<br>Zaidi, Deenaz; University of Alberta, Medicine<br>Ghimire, Anukul; University of Alberta, Department of Medicine<br>Tinwala, Mohammed; University of Alberta, Department of Medicine<br>Saad, Syed; University of Alberta, Department of Medicine<br>Osman, Mohamed; University of Alberta, Medicine<br>Lunyera, Joseph; Duke University School of Medicine, Medicine<br>Tonelli, Marcello; University of Calgary Cumming School of Medicine, Department of Medicine<br>Caskey, Fergus; University of Bristol Faculty of Medicine and Dentistry, Department of Medicine<br>George, Cindy; South African Medical Research Council, Non-Communicable Diseases Research Unit<br>Kengne , AP; Medical Research Council of South Africa, Non-Communicable Diseases Research Unit<br>Malik, Charu; International Society of Nephrology, Administration<br>Damster, Sandrine; International Society of Nephrology, Administration<br>Levin, Adeera; University of British Columbia, Division of Nephrology<br>Johnson, David; The University of Queensland Faculty of Medicine and Biomedical Sciences, Department of Medicine<br>Jha, Vivekanand; The George Institute for Global Health India, Department of Medicine<br>Bello, A; University of Alberta, |
| <b>Primary Subject Heading</b>: | Renal medicine                                                                                                                                                                                                                                                                                                                                                                                                                                                                                                                                                                                                                                                                                                                                                                                                                                                                                                                                                                                                                                                                                                                                                                                                                                                                                                                                                                                                                            |
| Secondary Subject Heading:      | Global health, Health informatics, Health services research                                                                                                                                                                                                                                                                                                                                                                                                                                                                                                                                                                                                                                                                                                                                                                                                                                                                                                                                                                                                                                                                                                                                                                                                                                                                                                                                                                               |
| Keywords:                       | COVID-19, Chronic renal failure < NEPHROLOGY, International health services < HEALTH SERVICES ADMINISTRATION & MANAGEMENT, Organisation of health services < HEALTH SERVICES ADMINISTRATION & MANAGEMENT                                                                                                                                                                                                                                                                                                                                                                                                                                                                                                                                                                                                                                                                                                                                                                                                                                                                                                                                                                                                                                                                                                                                                                                                                                  |
|                                 |                                                                                                                                                                                                                                                                                                                                                                                                                                                                                                                                                                                                                                                                                                                                                                                                                                                                                                                                                                                                                                                                                                                                                                                                                                                                                                                                                                                                                                           |

1  
2  
3  
4  
5  
6  
7  
8  
9  
10  
11  
12  
13  
14  
15  
16  
17  
18  
19  
20  
21  
22  
23  
24  
25  
26  
27  
28  
29  
30  
31  
32  
33  
34  
35  
36  
37  
38  
39  
40  
41  
42  
43  
44  
45  
46  
47  
48  
49  
50  
51  
52  
53  
54  
55  
56  
57  
58  
59  
60

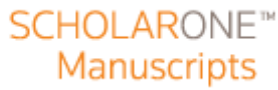

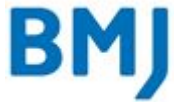

I, the Submitting Author has the right to grant and does grant on behalf of all authors of the Work (as defined in the below author licence), an exclusive licence and/or a non-exclusive licence for contributions from authors who are: i) UK Crown employees; ii) where BMJ has agreed a CC-BY licence shall apply, and/or iii) in accordance with the terms applicable for US Federal Government officers or employees acting as part of their official duties; on a worldwide, perpetual, irrevocable, royalty-free basis to BMJ Publishing Group Ltd ("BMJ") its licensees and where the relevant Journal is co-owned by BMJ to the co-owners of the Journal, to publish the Work in this journal and any other BMJ products and to exploit all rights, as set out in our [licence](#).

The Submitting Author accepts and understands that any supply made under these terms is made by BMJ to the Submitting Author unless you are acting as an employee on behalf of your employer or a postgraduate student of an affiliated institution which is paying any applicable article publishing charge ("APC") for Open Access articles. Where the Submitting Author wishes to make the Work available on an Open Access basis (and intends to pay the relevant APC), the terms of reuse of such Open Access shall be governed by a Creative Commons licence – details of these licences and which [Creative Commons](#) licence will apply to this Work are set out in our licence referred to above.

Other than as permitted in any relevant BMJ Author's Self Archiving Policies, I confirm this Work has not been accepted for publication elsewhere, is not being considered for publication elsewhere and does not duplicate material already published. I confirm all authors consent to publication of this Work and authorise the granting of this licence.

**Title:** Global Status of Infrastructure and Opportunities for eHealth: Implications for Kidney Care Delivery in Low-income and Lower-Middle-Income Countries.

**Authors:** Ikechi G. Okpechi,<sup>1</sup> Shezel Muneer,<sup>1</sup> Feng Ye,<sup>1</sup> Deenaz Zaidi,<sup>1</sup> Anukul Ghimire,<sup>1</sup> Mohammed Tinwala,<sup>1</sup> Syed, Saad,<sup>1</sup> Mohamed Osman,<sup>1</sup> Joseph Lunyera,<sup>2</sup> Marcello Tonelli,<sup>3</sup> Fergus Caskey,<sup>4</sup> Cindy George,<sup>5</sup> Andre P. Kengne,<sup>5</sup> Charu Malik,<sup>6</sup> Sandrine Damster,<sup>6</sup> Adeera Levin,<sup>7</sup> David W. Johnson,<sup>8,9,10</sup> Vivekanand Jha,<sup>11,12,13</sup> Aminu K. Bello<sup>1</sup>

**Affiliations:**

<sup>1</sup> Division of Nephrology, Department of Medicine, University of Alberta, Edmonton, Canada

<sup>2</sup> Division of General Internal Medicine, Department of Medicine, Duke University School of Medicine, Durham, North Carolina

<sup>3</sup> Department of Medicine, University of Calgary, Calgary, Alberta, Canada

<sup>4</sup> Department of Medicine, Population Health Sciences, Bristol Medical School, University of Bristol, Bristol, UK

<sup>5</sup> Non-communicable Diseases Research Unit, South African Medical Research Council (SAMRC), Tygerberg, South Africa

<sup>6</sup> International Society of Nephrology, Brussels, Belgium

<sup>7</sup> Division of Nephrology, Department of Medicine, University of British Columbia, Vancouver, British Columbia, Canada

<sup>8</sup> Department of Nephrology, Metro South and Integrated Nephrology and Transplant Services (MINTS), Princess Alexandra Hospital, Brisbane, Queensland, Australia

<sup>9</sup> Centre for Kidney Disease Research, University of Queensland at Princess Alexandra Hospital, Brisbane, Queensland, Australia

<sup>10</sup> Translational Research Institute, Brisbane, Queensland, Australia

<sup>11</sup> George Institute for Global Health, University of New South Wales (UNSW), New Delhi, India

<sup>12</sup> School of Public Health, Imperial College, London, UK

<sup>13</sup> Manipal Academy of Higher Education, Manipal, India

**Address for Correspondence and Reprints****Name:** Aminu K. Bello**Address:** Division of Nephrology and Immunology, Department of Medicine, University of Alberta, Edmonton, Alberta, Canada**Email:** [aminu1@ualberta.ca](mailto:aminu1@ualberta.ca)**Abstract word count (296)****Manuscript word count (3,796)****Keywords:** chronic kidney disease, eHealth, electronic health records, mHealth, telehealth, workforce

For peer review only

## Abstract

### Objective:

To describe the use of eHealth in support of health coverage for kidney care across eight eHealth themes: eHealth foundations, mobile health (mHealth), telehealth, eLearning, electronic health records, legal frameworks for eHealth, social media, and big data.

### Design, setting and participants:

We used data from the World Health Organization (WHO) third global survey on eHealth, as well as data from the World Bank, and Internet World Stats on global eHealth services. Data were recategorized by International Society of Nephrology (ISN) regions and presented descriptively.

### Outcome measures:

The availability of eHealth services (e.g., electronic health records (EHR), telehealth, etc) and governance frameworks (policies) for kidney care across ISN regions.

### Results:

The survey conducted by the WHO received responses from 125 (64.4%) Member States representing 4.4 billion people globally. The number of mobile cellular subscriptions were < 100% of the population in Africa, South Asia, North America, and North-East Asia; percentage of internet users increased from 2015 to 2020 in all regions. Western Europe had the highest percentage of internet users in all the periods: 2015 (82.0%), 2019 (90.7%), and 2020 (93.9%); Africa had the least: 9.8%, 21.8% and 31.4%, respectively. The North-East Asia region had the highest availability of national EHR (75%) and eLearning access in medical schools (100%) with the lowest in Africa (27% and 39%, respectively). Governance policies of eHealth (e.g., privacy, liability, data sharing) were more widely available in high-income countries (55% to 93%) than in low-income countries (0% to 47%) while access to mHealth for treatment adherence was more available in low-income countries (21%) than in high-income countries (7%).

### Conclusion:

The penetration of eHealth services across ISN regions is suboptimal, particularly in low-income countries. Increasing utilization of internet communication technologies provides an opportunity to improve access to kidney education and care globally, especially in low-income countries.



### Strengths and Limitations of this study:

- This study identified gaps in eHealth services available for kidney care across countries and regions of the International Society of Nephrology (ISN).
- We highlighted the increasing availability of mobile / cellular subscriptions and the number of internet users observed in various countries from 2015 to 2020, especially those in low-income groups.
- The study also highlights the lack of policy and governance strategies relevant to eHealth (e.g., privacy, liability, data sharing / ownership), as well as poor utilization of eHealth for learning and health information systems.
- Although workforce shortages for learning, training and delivery of kidney care are more pronounced in low resource settings than in high-income countries, we emphasized that this can be substantially mitigated by leveraging the increasing availability of electronic platforms to improve kidney health.
- A limitation of this work may relate to the non-participation in the survey used for our study of a few countries with large populations in their regions.

Peer review only

## Introduction:

Approximately 97% of people worldwide live within reach of a mobile cellular signal.<sup>1</sup> The widespread availability of this service can be a platform for increased utilization of registries, electronic health records and diseases surveillance systems to empower monitoring and reporting of disease incidence and prevalence,<sup>2</sup> patient outcomes,<sup>3</sup> and quality and safety of delivered care<sup>3,4</sup> as well as to allow comparison between and within health services.<sup>5-7</sup> eHealth is the cost-effective and secure use of information and communications technologies (ICT) in support of health and health-related fields, including health-care services, health surveillance, health literature, and health education, knowledge and research.<sup>8</sup> According to the World Health Organization (WHO), 87% of Member States have one or more national mHealth initiatives, 58% have an effective strategy for eHealth, 55% have legislation to protect electronic patient data.<sup>8</sup>

In the current era of the COVID-19 global pandemic, the potential for using eHealth to transform kidney disease management is increasingly recognized.<sup>9,10</sup> A cross-sectional survey conducted by the International Society of Nephrology (ISN) Global Kidney Health Atlas (GKHA) in 2017 reported low utilization of health information systems in the care of patients with kidney failure, especially in low-income countries (LICs) and lower-middle-income countries (LMICs).<sup>11</sup> However, the survey was limited by a focus on registries.<sup>11</sup> Furthermore, a systematic review of 43 studies that included 6,617 participants and evaluated the impact of an eHealth intervention in people with chronic kidney disease (CKD) did not find statistically significant improvements in the health domains assessed with eHealth in patients with CKD although eHealth was suggested to be useful for dietary sodium intake and fluid management.<sup>12</sup> However, other studies have shown that some forms of eHealth (e.g. telenephrology) are useful for improving access to kidney care in primary care settings,<sup>13</sup> for self-management for patients with CKD,<sup>14</sup> for nurse practitioner and nephrologist training

1  
2  
3 and education,<sup>15,16</sup> and for safe, economical and efficient care delivery in rural and remote  
4  
5 areas.<sup>17</sup> The current manuscript describes the status of eHealth services and eHealth  
6  
7 governance across ISN regions, using data from the World Health Organization (WHO) third  
8  
9 global survey on eHealth which aimed to survey global eHealth, explore developments in  
10  
11 eHealth since the previous survey, and its role in achieving universal health coverage.<sup>18</sup> We  
12  
13 also appraise the implications of our findings for kidney care across ISN regions.  
14  
15

## 16 17 **Methods**

18  
19 We leveraged published data from the WHO third global survey on eHealth.<sup>18</sup> The study,  
20  
21 which was designed using a survey method is summarized as follows. The survey was  
22  
23 developed and conducted by the WHO through the Global Observatory for eHealth (GOe)  
24  
25 with input and consultation from experts in eHealth health. The survey assessed eight themes  
26  
27 in eHealth including: (i) eHealth foundations, (ii) mobile health (mHealth), (iii) telehealth,  
28  
29 (iv) eLearning, (v) electronic health records (EHR), (vi) legal frameworks for eHealth, (vii)  
30  
31 social media and (viii) big data. Concise definitions of these themes are provided:  
32  
33

- 34  
35 – **eHealth:**<sup>19</sup> the cost-effective and secure use of ICT in support of health and health  
36  
37 related fields, including health-care services, health surveillance, health literature, and  
38  
39 health education, knowledge and research.
- 40  
41 – **mHealth:**<sup>18</sup> the use of mobile devices, such as mobile phones, patient monitoring  
42  
43 devices, Personal Digital Assistants, and wireless devices, for medical and public  
44  
45 health practice including free telephone hotlines for emergencies provided by trained  
46  
47 personnel and pre-recorded messages (toll-free emergency telephone services),  
48  
49 reminder messages provided by health services to patients aimed at achieving  
50  
51 medication adherence, reminder messages to patients to make or attend an  
52  
53 appointment, etc..  
54  
55  
56  
57  
58  
59  
60

- 1  
2  
3 – **Telehealth:**<sup>18</sup> the delivery of health care services through ICT for the exchange of  
4 information in real time (synchronously, e.g., by telephone or video link) or by store-  
5 and-forward methods (asynchronously, e.g., by email) for the diagnosis and treatment  
6 of diseases and injuries, research and evaluation, and for the continuing education of  
7 health professionals where patients and care providers are separated by distance.  
8  
9
- 10  
11 – **eLearning:**<sup>20</sup> the use of ICT for education  
12  
13
- 14  
15 – **Electronic Health Records (EHR):**<sup>18</sup> real-time, patient-centred records that provide  
16 immediate and secure information to authorized users and typically contain a patient's  
17 medical history, diagnoses and treatment, medications, allergies, immunizations, as  
18 well as radiology images and laboratory results.  
19  
20  
21
- 22 – **Legal framework for eHealth:**<sup>18</sup> the legislative process addressing transfer and use  
23 of information between health care workers and patients that is relevant to issues of  
24 privacy and confidentiality of patient data, access rights and sharing rights for data,  
25 addressing data quality and integrity as a basis for clinical and patient decision-  
26 making and rules governing the adaptation of professional liability to accommodate  
27 care provided remotely or virtually.  
28  
29  
30
- 31 – **Social Media:**<sup>18</sup> interactive platforms for individuals, communities and organizations  
32 to share and discuss content, debate issues and promote new ideas e.g. Facebook,  
33 Twitter or YouTube.  
34  
35  
36
- 37 – **Big data:**<sup>18</sup> refers to extremely large data sets that encompass a range of data  
38 including clinical data from electronic health records; the phenotype; genomic  
39 information; and data on other determinants of health such as environment and  
40 lifestyle.  
41  
42  
43  
44  
45  
46  
47  
48  
49  
50  
51  
52  
53  
54  
55

56 The survey was developed in English and translated into seven languages (Arabic,  
57 Chinese, English, French, Russian, Spanish and Portuguese) to improve country responses  
58  
59  
60

1  
2  
3 and accuracy of responses. A web-based tool, (LimeSurvey -  
4  
5 <https://www.limesurvey.org/en/>), was used for online form creation, data collection and  
6  
7 management. WHO regional offices staff assisted in coordinating the survey process and  
8  
9 liaising with the GOe Secretariat in Geneva. National level survey coordinators, together with  
10  
11 relevant ministries and academic and research institutions identified between 5 and 10  
12  
13 national expert informant groups in eHealth to participate in the survey. The group consisted  
14  
15 of eHealth specialists, professionals in telehealth, EHRs, mHealth and statisticians  
16  
17 responsible for national health data. Expert informants met for one day to reach consensus on  
18  
19 a single national-level response. Hence, each participating country submitted a single national  
20  
21 survey with input from its group of expert informants. The survey was conducted between 1  
22  
23 April and 30 June 2015. Data on ICT indices (a composite index of fixed-telephone  
24  
25 subscriptions, mobile-cellular telephone subscriptions, international Internet bandwidth per  
26  
27 Internet user, households with a computer, and households with Internet access; scored as  
28  
29 low as 0 to as high as 100 and presented in unit scores) were obtained from the World Bank<sup>21</sup>  
30  
31 while more recent (2019 and 2020) data on internet usage were obtained from Internet World  
32  
33 Stats (<https://www.internetworldstats.com/>).  
34  
35  
36  
37  
38  
39

### 40 **Data handling and processing**

41  
42 After receiving the completed questionnaires, all non-English responses were  
43  
44 translated into English and survey responses were checked for consistency. Data were then  
45  
46 analyzed by thematic sections using computed percentages for each “yes” response to obtain  
47  
48 the overall results for all responding countries and regions. We regrouped country responses  
49  
50 using the ten ISN regional classification: Africa, East and Central Europe, Latin America,  
51  
52 Middle East, Newly Independent States (NIS) and Russia, North America and Caribbean,  
53  
54 North and East Asia, Oceania and South East Asia (OSEA), South Asia and Western Europe  
55  
56 (<https://www.theisn.org/about-isn/governance/regional-boards/>). Country responses were also  
57  
58  
59  
60

1  
2  
3 grouped according to World Bank income groups. Data on mobile-cellular subscriptions and  
4 internet users in each region were provided as the median percentage of the total population  
5 of participating regions. No statistical comparisons were used for describing the data which  
6 were presented in percentages.  
7  
8  
9  
10  
11

### 12 **Patient and public involvement:**

13  
14 Patients or the public were not involved in the design, or conduct, or reporting, or  
15 dissemination plans of our research.  
16  
17  
18

### 19 **Results**

#### 20 ***(i) Participating country indices***

21  
22 A response to the survey was received from 125 WHO Member States out of 194  
23 Member States that were surveyed, representing a response rate of 64.4% and a total  
24 population of 4.39 billion people. The list of participating countries based on ISN regional  
25 groups is presented in Supplementary Table S1 and a summary of the demographic,  
26 economic and health metrics for each region is shown in Table 1. Overall, the median ICT  
27 development index for participating countries was 4.8 (95% CI: 2.9-6.9). Four regions: Africa  
28 (2.3), South Asia (2.3), OSEA (4.0) and Latin America (4.4) had lower indices compared to  
29 the median value while Western Europe had the highest (7.9). Subscriptions to mobile-  
30 cellular networks was highest in the Latin America region (124.6% [95% CI: 89.9 – 142.7])  
31 and lowest in South Asia (71.3% [95% CI: 63.7 – 120.6]) while percentage of the population  
32 that used the internet was highest in Western Europe (82.0% [95% CI: 70.0 – 93.0]) and  
33 lowest in Africa (9.8% [95% CI: 3.0 – 18.1]) (Figure 1). However, internet users increased  
34 across all regions in 2019 and 2020, including Africa (21.8% and 31.4%, respectively) and  
35 South Asia (34% and 46%, respectively) (Figure 1).  
36  
37  
38  
39  
40  
41  
42  
43  
44  
45  
46  
47  
48  
49  
50  
51  
52  
53  
54

#### 55 ***(ii) National eHealth policies, funding, and capacity building***

1  
2  
3 A national policy for eHealth was available in all participating countries in North  
4 America (100%) and North-East Asia (100%) and was lowest in participating countries from  
5 Africa (42%) and East and Central European countries (47%) (Figure S1). Availability of  
6 policies governing health information systems in countries across regions also varied across  
7 regions. Overall, participating countries reported multiple sources of funding for eHealth  
8 including public (77%), donor (non-public) (63%), private (commercial) (40%) and public-  
9 private partnerships (42%) and LICs and LMICs relied more on donor funding for eHealth  
10 services (Figure S2). Overall, pre-service, and in-service training in eHealth were available in  
11 74% and 77%, respectively. Pre-service training was lowest in Africa (55%) and highest in  
12 NIS and Russia (100%) and North America (100%). In-service training was lowest in Africa  
13 (58%) and highest in North and East Asia (100%) (Figure S3).

### 28 **(iii) mHealth**

30 Data on access to mHealth across 3 of the 6 domains reported (toll-free emergency,  
31 appointment reminders and treatment adherence) are provided in Supplementary Table S2.  
32 International toll-free emergency access to mHealth was available in only 2 regions: OSEA  
33 (10%) and Western Europe (11%) and was unavailable in all regions for appointment  
34 reminders. National toll-free emergency access to mHealth services was variably available in  
35 all regions. Access to National mHealth services for treatment adherence was mostly  
36 available in low-income countries (21%) and was lowest in high-income countries (HICs)  
37 (7%).

### 48 **(iv) Telehealth**

50 Teledermatology, telepathology, teleradiology and telepsychiatry were reported but  
51 telenephrology programs were not reported. Nonetheless, services to remote patient  
52 monitoring were mostly available in HICs (40%) and at the local / peripheral health care  
53 system level with the program fully established only in 26% of countries (Table 2).

### **(v) eLearning**

The availability of eLearning for health sciences students (pre-service) and health professionals (in-service) in Medicine (Medical School), nursing and midwifery and pharmacy are reported in Figure S4. Use of eLearning in medical school was highest in North-East Asia (100%) and lowest in South Asia (40%) and Africa (39%). North-East Asia also had the highest use of eLearning services for pre-service training of nurses and midwives (75%) and pharmacists (100%). Use of eLearning for pharmacists training was unavailable in South Asia (Figure S4).

### **(vi) Electronic health records (EHR) systems**

National EHR systems were mostly available in North-East Asia (75%) while countries in Africa had the least availability of EHR systems (27%) (Figure 2A). Overall, secondary healthcare facilities were more likely to have EHR systems (42%) than primary healthcare (41%) or tertiary healthcare facilities (39%) (Figure S5). Secondary and tertiary facilities in the NIS and Russia region had the highest availability of EHR systems (73% and 64%, respectively) while all tiers of healthcare facilities in Africa had the lowest (Figure S5). Availability of laboratory information systems, pathology information systems, picture archiving and communication system (PACS) and pharmacy information systems by income groups are shown in Figures 2B-2E with most regions reporting low availability of these systems for healthcare. Human resource availability for health information systems was similar across income groups but was highest in the Oceania and the South-East Asia region (80%) (Figure S6).

### **(vii) Legal frameworks for eHealth**

Aspects of the legal framework governing use of eHealth were not readily available across countries and regions (Figure S7). For instance, countries from the South Asia region, did not have frameworks governing liability or reimbursement for eHealth, patient safety and



1  
2  
3 quality of care based on data quality, protection of the privacy of individuals, sharing of  
4 digital data between health professionals and sharing of personal health data between  
5 research entities (Figure S7).  
6  
7

#### 8 9 10 **(viii) Social media**

11  
12 National policy on use of social media by government organizations was lacking and  
13 ranged from as low as 9% in the NIS and Russia region to 50% in the North-East Asia region.  
14 However, specific policy on the use of social media in the health domain was unavailable in  
15 six regions (Eastern and Central Europe, Latin America, Middle East, NIS & Russia, North  
16 America and South Asia). When utilized, social media were mostly used for making  
17 emergency announcements, general health announcements and for health promotion  
18 campaigns (Figure S8).  
19  
20  
21  
22  
23  
24  
25  
26  
27

#### 28 29 **(ix) Big data**

30 Information on policy or strategies that govern use of big data in the health sector and  
31 private companies was sparsely reported. North-East Asia had the highest proportion of  
32 policies in the health sector (75%) whilst Africa had the least (6%). No data was obtained for  
33 North America. (Figure S9).  
34  
35  
36  
37  
38  
39

### 40 **Discussion**

41  
42 The United Nations Sustainable Development Goals emphasizes the great potential of  
43 the spread of information and communications technology and global interconnectedness to  
44 accelerate human progress, and to bridge the digital divide to develop knowledge in  
45 societies.<sup>22</sup> The ISN-GKHA has identified large and varied gaps in resources and workforce  
46 required for adequate provision of kidney care across several countries, particularly in LICs  
47 and LMICs in all the ISN regions. eHealth services may be potential vehicle to harness local  
48 resources for improvements in kidney care. This study, which mainly analyzed WHO eHealth  
49 survey data using the ISN regional groups, found low ICT development indices mostly in  
50  
51  
52  
53  
54  
55  
56  
57  
58  
59  
60

1  
2  
3 LIC and LMICs, low availability of national EHR and proportion of national eHealth policies  
4  
5 in LICs and LMICs, increased utilization of mHealth services in low-income settings, lack of  
6  
7 use of eLearning across regions and absence of legal frameworks governing use of eHealth in  
8  
9 several ISN regions. These findings underscore the need for concerted action if eHealth is to  
10  
11 achieve its potential for reducing inequities in kidney care across regions and countries.  
12  
13

14  
15 A major challenge in accessing kidney care in many countries is the lack of skilled  
16  
17 workforce, specifically the absence of an adequate number of nephrologists.<sup>23</sup> The  
18  
19 nephrologist density in HICs in North America and Western Europe is more than 90 times  
20  
21 that in low-income countries in Africa, South Asia and Oceania region (28.52 per million  
22  
23 population [pmp] vs. 0.31 pmp),<sup>24</sup> suggesting a clear disadvantage in care access for  
24  
25 populations with low nephrologist densities.<sup>25</sup> In a global survey Lunney et al identified  
26  
27 geography and low nephrology workforce to be associated with lack of access to kidney care,  
28  
29 especially in low-income countries.<sup>26</sup> Low nephrology workforce, particularly in rural or  
30  
31 remote areas often means long travel distance to access care<sup>27</sup> with potentially negative  
32  
33 consequences, including increased cost of care, low quality of life,<sup>28</sup> lack of access to kidney  
34  
35 replacement therapies (KRT; i.e. dialysis and transplantation)<sup>28-30</sup> and increased likelihood of  
36  
37 death.<sup>31</sup> In a large South African Province with only 2 public service nephrologists, a study  
38  
39 that assessed the predictors of mortality in rural dwelling patients receiving KRT at a district  
40  
41 hospital, found mortality to be higher in PD patients ( $P < 0.001$ ) who travelled farther to reach  
42  
43 the hospital than those treated with HD.<sup>29</sup> These challenges are not limited to low resource  
44  
45 countries. One study from Australia estimated that use of telehealth services for evaluating  
46  
47 post-transplant patients resulted in a net saving of 203,202 kilometres in patient travel  
48  
49 distance; 2771 hours in car travel time; about AUD \$31,048 in petrol savings and 51 tonnes  
50  
51 CO<sub>2</sub> equivalents of greenhouse gas emissions.<sup>27</sup> Due to the widespread availability of mobile  
52  
53 cellular signals,<sup>1</sup> cellular and internet technologies have potential to improve access to  
54  
55  
56  
57  
58  
59  
60

1  
2  
3 nephrology care in remote and/or underserved settings. Access to care can also be improved  
4  
5 in children with kidney diseases given the significant shortage of paediatric nephrologists<sup>32</sup>  
6  
7 and mitigate high mortality identified in children with kidney failure in regions such as  
8  
9 Africa.<sup>33</sup> The global COVID-19 pandemic demonstrates that use of eHealth technologies will  
10  
11 likely increase over the coming years,<sup>34,35</sup> thereby highlighting the need to strengthen  
12  
13 governance on how eHealth systems are utilized across ISN regions. Care of patients with  
14  
15 CKD has been grossly affected during the pandemic, and it falls upon the stakeholder  
16  
17 community to develop sustainable solutions.  
18  
19  
20

21 The prevalence of CKD risk factors such as hypertension and diabetes mellitus  
22  
23 continue to increase globally. The rise is projected to be significant, especially in LICs and  
24  
25 LMICs of South and South East Asia and Africa.<sup>36,37</sup> For instance, globally, 79% of people  
26  
27 with diabetes live in LICs or LMICs (mostly Oceania, South and South East Asia region) and  
28  
29 projections of diabetes prevalence by 2045 suggest an increase of 143% in Africa, 96% in the  
30  
31 Middle East and 74% in South East Asia compared with 15% and 33% increase in Europe  
32  
33 and North America, respectively.<sup>36</sup> Innovative models of care delivery are therefore needed to  
34  
35 manage the growing disease burden. Given the wide coverage of mobile phone networks,  
36  
37 mHealth holds promise as an important delivery tool for health care delivery in resource  
38  
39 constrained regions (Figure 1). mHealth interventions are in use for diagnosis and  
40  
41 management of various infectious diseases including malaria,<sup>38</sup> tuberculosis,<sup>39</sup> and HIV<sup>40</sup> and  
42  
43 for improving maternal and foetal health<sup>41</sup> in several developing countries. Although mHealth  
44  
45 interventions are increasingly used for non-communicable diseases,<sup>42-44</sup> some studies  
46  
47 highlight only a modest impact in NCD control likely due to limited number of studies and  
48  
49 impact on process of care alone.<sup>45,46</sup> Our analysis showed that use of mHealth (appointment  
50  
51 reminders and treatment adherence) and telehealth services (remote patient monitoring) were  
52  
53 much higher in LICs and LMICs than in HICs (Supplementary Table S2 and Table 2). In a  
54  
55  
56  
57  
58  
59  
60

1  
2  
3 study conducted in a rural Indonesian population multifaceted mobile technology-supported  
4 primary health care intervention was associated with greater use of preventive CVD  
5 medication and lower BP levels among high-risk individuals.<sup>47</sup> These findings suggest that  
6 despite the relatively low current use, mHealth may be potentially useful for supporting case-  
7 finding for CKD,<sup>44</sup> CKD-specific education to improve awareness, integrated care delivery  
8 and efficient referral pathways, and perhaps allow quality control through real-time  
9 monitoring.<sup>48</sup>

10  
11  
12 To guide implementation, ethical issues including type and quality of digital  
13 technology, doctor-patient relationship, data confidentiality and security, informed consent  
14 and patients and families satisfaction with telemedicine services should be considered in  
15 framing legal governance for eHealth.<sup>49</sup> Increasing the use of such technologies will require  
16 demonstration of public benefits (e.g. cost saving),<sup>50</sup> while ensuring that there is no  
17 discrimination or digital inequality (e.g. not tailored to only those with a smartphone or for  
18 the disabled)<sup>51</sup> and to protect patient and data privacy.<sup>52</sup> As our study shows, the legal  
19 frameworks that govern sharing of personal health data or digital data and protect the privacy  
20 of individual health-related data were either low or absent in many regions. There is need to  
21 address such legislation in all regions (Figure S7).

22  
23  
24 Our study also identified EHR use to be low in LICs and LMICs with poor utilization  
25 of eLearning for pre-and in-service training in the health sectors (Figure S5). Barriers that  
26 impede adoption and/or implementation of EHR systems such as cost (including setting up,  
27 maintenance and ongoing costs), technical concerns, technical support, resistance to changing  
28 work habits, loss of income and loss of productivity will need to be identified in each setting  
29 and addressed. As Kruse et al<sup>53</sup> have suggested, policy makers will need to consider  
30 incentives that reduce the implementation cost of EHR, possibly aimed more directly at  
31 organizations that are known to have lower adoption rates, such as small hospitals in rural  
32  
33  
34  
35  
36  
37  
38  
39  
40  
41  
42  
43  
44  
45  
46  
47  
48  
49  
50  
51  
52  
53  
54  
55  
56  
57  
58  
59  
60

1  
2  
3 areas. However, this may be possible in HICs where such technologies are readily available,  
4  
5  
6 whereas in LICs and LMICs, such incentives should be targeted towards secondary and  
7  
8 tertiary care centres that serve a wider population. Measures that ensure successful adoption  
9  
10 and implementation of EHR technology including systems usability (acceptable and ease of  
11  
12 use), interoperability (functional across platforms, e.g., IOS and Android), and adaptability  
13  
14 (fitting the technology into local context, e.g., language) need to be considered in terms of  
15  
16 local context, individual end-users and advancing technology.<sup>54</sup>  
17  
18  
19

20 The potential and value of eLearning in addressing workforce shortages<sup>20,55</sup> and the  
21  
22 educational needs of health professionals, especially in developing countries is well  
23  
24 recognized.<sup>56</sup> The ISN fellowship program recently included hybrid (online plus hands-on)  
25  
26 training as part of the strategy for improving training of nephrologists from low-resource  
27  
28 settings.<sup>23</sup> This can improve training in glomerular diseases (histopathology), assessment of  
29  
30 urine microscopic findings as well as various aspects of interventional nephrology including  
31  
32 dialysis catheter insertion and care. A number of groups have used virtual platforms to upskill  
33  
34 healthcare workers in the care of patients with COVID-19 in India and Africa.<sup>57</sup> Access to the  
35  
36 basic IT infrastructure (e.g. computers and internet) remains a major hurdle to the  
37  
38 implementation of technology-enhanced teaching in developing countries.<sup>56</sup> Any solution  
39  
40 should be sensitive to local resources and be designed to operate at low cost (data, device).  
41  
42 One study that assessed the awareness, attitudes, preferences, and challenges to eLearning  
43  
44 among medical and nursing students at Makerere University, Uganda identified low monthly  
45  
46 income, quality of internet connectivity and lack of computer ownership among factors that  
47  
48 significantly affected attitudes towards eLearning.<sup>58</sup> Perceived advantages of online learning  
49  
50 by medical students in the UK included time and money saved from lack of travel and  
51  
52 flexibility and ability to learn at one's own pace whereas family distractions, internet  
53  
54 connection and the timing of tutorials were identified as barriers.<sup>59</sup> The extent of integration  
55  
56  
57  
58  
59  
60

1  
2  
3 of eLearning in health sciences (Medicine, Nursing and midwifery and Pharmacy) for both  
4  
5 pre- and in-service training was low in most regions in our study (Figure S4). The impact of  
6  
7 an improved integration of eLearning in health sciences will be widespread across all medical  
8  
9 disciplines.  
10

11  
12         There were a few limitations to this study previously described in the WHO report.<sup>18</sup>  
13  
14 These include that the report is old (2015), given that there are no other reports superseding  
15  
16 this with a global reach. However, our study has made up for this by the inclusion of newer  
17  
18 data from elsewhere showing availability and use of telecommunications services as a proxy  
19  
20 for use of eHealth that rely on such services. Also, WHO Member States were limited to one  
21  
22 response per country i.e., expert informants were required to propose a consensus response  
23  
24 for each question which was difficult in cases where the situation varied widely within the  
25  
26 country. Furthermore, although every effort was made to select the best national experts to  
27  
28 complete the instrument; the knowledge capacity of each focus group to accurately answer  
29  
30 the questions was not determined. Another limitation of this study is the focus on large  
31  
32 hospitals and private health institutions as all eHealth capacities and strategies (e.g., primary  
33  
34 care level or general practitioner clinics) may not have been adequately captured, thus  
35  
36 underestimating its use across countries. However, this data provides a broad scan of the  
37  
38 availability of these services across participating countries and regions, therefore useful for  
39  
40 monitoring progress and for improving services. Finally, some countries with large  
41  
42 populations (e.g., France, Germany, Brazil, Egypt, Nigeria, and India) did not participate in  
43  
44 the 2015 survey. This is likely to have affected some of the results of this survey e.g.,  
45  
46 proportion with access to the internet. Despite the limitations, this study is the first to present  
47  
48 a comprehensive overview of the status and penetration of eHealth in ISN regions using data  
49  
50 from the WHO global survey on eHealth. Our study has also been able to address identified  
51  
52  
53  
54  
55  
56  
57  
58  
59  
60

1  
2  
3 gaps in availability of eHealth services and the implications of these for kidney care across  
4  
5 ISN regions, particularly for LICs and LMICs.  
6  
7

### 8 **Conclusion:**

9  
10 There is wide variation in the availability and accessibility of eHealth services across  
11  
12 ISN regions with much reduced availability and access in LICs and LMICs. This is likely to  
13  
14 have a significant negative impact for adequate kidney care provision in these regions,  
15  
16 especially at a time when there are global restrictions in face-to-face contacts. Even though  
17  
18 much infrastructure is required to set up such services, simple steps can be initiated towards  
19  
20 broader use of eHealth services to aid care including legislations and provision of national  
21  
22 guidelines / requirements on use of these technologies. Infrastructure development to improve  
23  
24 access to the internet will need to be improved across regions especially in low-income  
25  
26 countries. With rapidly evolving ICT technologies and as digitalization of medical education  
27  
28 and care continues to gather pace in the future of healthcare, further research on the impact of  
29  
30 eHealth in care of patients with kidney diseases is critical. The development of and access to  
31  
32 appropriate technologies which facilitate equitable and high-quality care are needed to ensure  
33  
34 no one is left behind.  
35  
36  
37  
38

39  
40 **Contributors:** AKB conceptualized the research; SM, DZ and SS collated and checked the  
41  
42 data for accuracy and completeness; FY analyzed the data; IGO designed the figures and  
43  
44 Tables and drafted the first version of the manuscript. IGO, SM, FY, DZ, AG, MTi, SS, MO,  
45  
46 JL, MTo, FC, CG, APK, CM, SD, AL, DWJ, VJ, and AKB provided inputs for the  
47  
48 interpretation of results and documentation of implications of the study findings in the  
49  
50 discussion. IGO, SM, FY, DZ, AG, MTi, SS, MO, JL, MTo, FC, CG, APK, CM, SD, AL,  
51  
52 DWJ, VJ, and AKB contributed to the preparation of the final version, read, and agreed with  
53  
54 the final version of the manuscript. The corresponding author attests that all listed authors  
55  
56 meet authorship criteria and that no others meeting the criteria have been omitted.  
57  
58  
59  
60

1  
2  
3 **Funding:** No funding was received for this work.  
4

5 **Competing interests:** DWJ has received consultancy fees, research grants, speaker's  
6 honoraria and travel sponsorships from Baxter Healthcare and Fresenius Medical Care,  
7  
8 consultancy fees from Astra Zeneca and AWAK, speaker's honoraria and travel sponsorships  
9  
10 from ONO, and travel sponsorships from Amgen. He is a current recipient of an Australian  
11  
12 National Health and Medical Research Council Leadership Investigator Grant. The remaining  
13  
14 authors have no conflicts of interest to declare. VJ has received grants, speaker honoraria or  
15  
16 consultancy fees from GlaxoSmithKline, Biocon, Baxter, Janssen, Medtronic, and  
17  
18 NephroPlus. He has a policy of all funds being paid to his employer. AB has received  
19  
20 consultancy fees from Janssen  
21  
22  
23  
24  
25

26 **Patient consent for publication:** Not required  
27

28 **Ethics approval:** All data used in this study were already in the public domain and ethical  
29  
30 approval was not required.  
31

32 **Data availability statement:** No additional data are available.  
33

34 **Acknowledgement:** We would like to thank Ms Sophanny Tiv (University of Alberta) for  
35  
36 assisting us with some of the Figures and charts.  
37  
38  
39  
40

#### 41 **References:**

- 42 1. International Telecommunication Union (ITU). Measuring Digital Developments: Facts and  
43 Figures (2019). <https://itu.foleon.com/itu/measuring-digital-development/network-coverage/>. Accessed 18 December 2020.
- 44 2. Larsson S, Lawyer P, Garellick G, Lindahl B, Lundström M. Use of 13 disease registries in 5  
45 countries demonstrates the potential to use outcome data to improve health care's value.  
46 *Health Aff (Millwood)*. 2012;31(1):220-227.
- 47 3. Hoque DME, Kumari V, Hoque M, Ruseckaite R, Romero L, Evans SM. Impact of clinical  
48 registries on quality of patient care and clinical outcomes: A systematic review. *PLoS One*.  
49 2017;12(9):e0183667.
- 50 4. Han W, Sharman R, Heider A, Maloney N, Yang M, Singh R. Impact of electronic diabetes  
51 registry 'Meaningful Use' on quality of care and hospital utilization. *Journal of the American  
52 Medical Informatics Association : JAMIA*. 2016;23(2):242-247.
- 53 5. ERA-EDTA Registry. *ERA-EDTA Registry Annual Report 2017. Amsterdam UMC, location AMC,  
54 Department of Medical Informatics, Amsterdam, the Netherlands, 2019.*  
55  
56  
57  
58  
59  
60



- 1
  - 2
  - 3
  - 4
  - 5
  - 6
  - 7
  - 8
  - 9
  - 10
  - 11
  - 12
  - 13
  - 14
  - 15
  - 16
  - 17
  - 18
  - 19
  - 20
  - 21
  - 22
  - 23
  - 24
  - 25
  - 26
  - 27
  - 28
  - 29
  - 30
  - 31
  - 32
  - 33
  - 34
  - 35
  - 36
  - 37
  - 38
  - 39
  - 40
  - 41
  - 42
  - 43
  - 44
  - 45
  - 46
  - 47
  - 48
  - 49
  - 50
  - 51
  - 52
  - 53
  - 54
  - 55
  - 56
  - 57
  - 58
  - 59
  - 60
6. USRDS. *United States Renal Data System. 2018 USRDS annual data report: Epidemiology of kidney disease in the United States. National Institutes of Health, National Institute of Diabetes and Digestive and Kidney Diseases, Bethesda, MD, 2018. 2018.*
7. Davids MR, Eastwood JB, Selwood NH, et al. A renal registry for Africa: first steps. *Clinical kidney journal*. 2016;9(1):162-167.
8. World Health Organization. eHealth at the WHO. <https://www.who.int/ehealth/about/en/>. Accessed 18 December 2020.
9. Singh T, Ngho CL, Wong K, Khan BA. Impact of Telemedicine on Hospitalisation and Mortality Rates in Community-Based Haemodialysis Centres in Singapore during the COVID-19 Pandemic. *Ann Acad Med Singap*. 2020;49(10):756-763.
10. Wang CS, Ku E. eHealth in kidney care. *Nat Rev Nephrol*. 2020;16(7):368-370.
11. See EJ, Alrukhaimi M, Ashuntantang GE, et al. Global coverage of health information systems for kidney disease: availability, challenges, and opportunities for development. *Kidney Int Suppl (2011)*. 2018;8(2):74-81.
12. Stevenson JK, Campbell ZC, Webster AC, et al. eHealth interventions for people with chronic kidney disease. *The Cochrane database of systematic reviews*. 2019;8(8):Cd012379.
13. Zuniga C, Riquelme C, Muller H, Vergara G, Astorga C, Espinoza M. Using Telenephrology to Improve Access to Nephrologist and Global Kidney Management of CKD Primary Care Patients. *Kidney international reports*. 2020;5(6):920-923.
14. Shen H, van der Kleij R, van der Boog PJM, Chang X, Chavannes NH. Electronic Health Self-Management Interventions for Patients With Chronic Kidney Disease: Systematic Review of Quantitative and Qualitative Evidence. *Journal of medical Internet research*. 2019;21(11):e12384.
15. Osman MA, Okel J, Okpechi IG, Jindal K, Bello AK. Potential applications of telenephrology to enhance global kidney care. *BMJ Glob Health*. 2017;2(2):e000292.
16. Rutledge CM, Kott K, Schweickert PA, Poston R, Fowler C, Haney TS. Telehealth and eHealth in nurse practitioner training: current perspectives. *Adv Med Educ Pract*. 2017;8:399-409.
17. Venuthurupalli SK, Rolfe A, Fanning J, Cameron A, Hoy WE. Chronic Kidney Disease, Queensland (CKD.QLD) Registry: Management of CKD With Telenephrology. *Kidney international reports*. 2018;3(6):1336-1343.
18. World Health Organization. Global diffusion of eHealth: making universal health coverage achievable. Report of the third global survey on eHealth. Geneva: World Health Organization; 2016. [https://www.who.int/goe/publications/global\\_diffusion/en/](https://www.who.int/goe/publications/global_diffusion/en/). Accessed 19 December 2020.
19. World Health Organization. Resolution WHA58.33. Sustainable health financing, universal coverage and social health insurance. In: Fifty-eighth World Health Assembly, Geneva, 16–25 May 2005. Resolutions and decisions annex. Geneva: World Health Organization; 2005 [http://apps.who.int/gb/ebwha/pdf\\_files/WHA58-REC1/english/A58\\_2005\\_REC1-en.pdf](http://apps.who.int/gb/ebwha/pdf_files/WHA58-REC1/english/A58_2005_REC1-en.pdf). Accessed 18 December 2020.
20. Ruggeri K, Farrington C, Brayne C. A global model for effective use and evaluation of e-learning in health. *Telemedicine journal and e-health : the official journal of the American Telemedicine Association*. 2013;19(4):312-321.
21. World Bank. TCdata360: Country rank and value in the ITU ICT development index. [https://tcdata360.worldbank.org/indicators/h2e1ddd20?country=BRA&indicator=24719&viz=bar\\_chart&years=2015](https://tcdata360.worldbank.org/indicators/h2e1ddd20?country=BRA&indicator=24719&viz=bar_chart&years=2015). Accessed 18 December 2020.
22. United Nations. Transforming our world: the 2030 Agenda for Sustainable Development. <https://sdgs.un.org/2030agenda>. Accessed 16 October 2020.
23. Okpechi IG, Eddy AA, Jha V, Jacob T, Dupuis S, Harris DC. Impact of training nephrologists from developing nations and strategies for sustaining a training program in its fourth decade. *Kidney Int*. 2021;99(5):1073-1076.

- 1
  - 2
  - 3
  - 4
  - 5
  - 6
  - 7
  - 8
  - 9
  - 10
  - 11
  - 12
  - 13
  - 14
  - 15
  - 16
  - 17
  - 18
  - 19
  - 20
  - 21
  - 22
  - 23
  - 24
  - 25
  - 26
  - 27
  - 28
  - 29
  - 30
  - 31
  - 32
  - 33
  - 34
  - 35
  - 36
  - 37
  - 38
  - 39
  - 40
  - 41
  - 42
  - 43
  - 44
  - 45
  - 46
  - 47
  - 48
  - 49
  - 50
  - 51
  - 52
  - 53
  - 54
  - 55
  - 56
  - 57
  - 58
  - 59
  - 60
24. Osman MA, Alrukhaimi M, Ashuntantang GE, et al. Global nephrology workforce: gaps and opportunities toward a sustainable kidney care system. *Kidney Int Suppl (2011)*. 2018;8(2):52-63.
25. Bello AK, Levin A, Lunney M, et al. Status of care for end stage kidney disease in countries and regions worldwide: international cross sectional survey. *Bmj*. 2019;367:l5873.
26. Lunney M, Alrukhaimi M, Ashuntantang GE, et al. Guidelines, policies, and barriers to kidney care: findings from a global survey. *Kidney Int Suppl (2011)*. 2018;8(2):30-40.
27. Andrew N, Barraclough KA, Long K, et al. Telehealth model of care for routine follow up of renal transplant recipients in a tertiary centre: A case study. *J Telemed Telecare*. 2020;26(4):232-238.
28. Gray NA, Dent H, McDonald SP. Renal replacement therapy in rural and urban Australia. *Nephrol Dial Transplant*. 2012;27(5):2069-2076.
29. Tamayo Isla RA, Ameh OI, Mapiye D, et al. Baseline Predictors of Mortality among Predominantly Rural-Dwelling End-Stage Renal Disease Patients on Chronic Dialysis Therapies in Limpopo, South Africa. *PLoS One*. 2016;11(6):e0156642.
30. Tonelli M, Hemmelgarn B, Kim AK, et al. Association between residence location and likelihood of kidney transplantation in Aboriginal patients treated with dialysis in Canada. *Kidney Int*. 2006;70(5):924-930.
31. Tonelli M, Hemmelgarn B, Culleton B, et al. Mortality of Canadians treated by peritoneal dialysis in remote locations. *Kidney Int*. 2007;72(8):1023-1028.
32. McCulloch M, Luyckx VA, Cullis B, et al. Challenges of access to kidney care for children in low-resource settings. *Nat Rev Nephrol*. 2020.
33. Ashuntantang G, Osafo C, Olowu WA, et al. Outcomes in adults and children with end-stage kidney disease requiring dialysis in sub-Saharan Africa: a systematic review. *The Lancet Global health*. 2017;5(4):e408-e417.
34. Fernandes L, FitzPatrick ME, Roycroft M. The role of the future physician: building on shifting sands. *Clin Med (Lond)*. 2020;20(3):285-289.
35. Gasser U, Ienca M, Scheibner J, Sleight J, Vayena E. Digital tools against COVID-19: taxonomy, ethical challenges, and navigation aid. *Lancet Digit Health*. 2020;2(8):e425-e434.
36. Cho NH, Shaw JE, Karuranga S, et al. IDF Diabetes Atlas: Global estimates of diabetes prevalence for 2017 and projections for 2045. *Diabetes research and clinical practice*. 2018;138:271-281.
37. Kearney PM, Whelton M, Reynolds K, Muntner P, Whelton PK, He J. Global burden of hypertension: analysis of worldwide data. *Lancet (London, England)*. 2005;365(9455):217-223.
38. Larocca A, Moro Visconti R, Marconi M. Malaria diagnosis and mapping with m-Health and geographic information systems (GIS): evidence from Uganda. *Malar J*. 2016;15(1):520.
39. Maraba N, Hoffmann CJ, Chihota VN, et al. Using mHealth to improve tuberculosis case identification and treatment initiation in South Africa: Results from a pilot study. *PLoS One*. 2018;13(7):e0199687.
40. Cooper V, Clatworthy J, Whetham J, Consortium E. mHealth Interventions To Support Self-Management In HIV: A Systematic Review. *Open AIDS J*. 2017;11:119-132.
41. Olajubu AO, Fajemilehin BR, Olajubu TO, Afolabi BS. Effectiveness of a mobile health intervention on uptake of recommended postnatal care services in Nigeria. *PLoS One*. 2020;15(9):e0238911.
42. Mao Y, Lin W, Wen J, Chen G. Impact and efficacy of mobile health intervention in the management of diabetes and hypertension: a systematic review and meta-analysis. *BMJ Open Diabetes Res Care*. 2020;8(1).
43. Lu X, Yang H, Xia X, et al. Interactive Mobile Health Intervention and Blood Pressure Management in Adults. *Hypertension*. 2019;74(3):697-704.

- 1
- 2
- 3
- 4 44. Li R, Liang N, Bu F, Hesketh T. The Effectiveness of Self-Management of Hypertension in
- 5 Adults Using Mobile Health: Systematic Review and Meta-Analysis. *JMIR Mhealth Uhealth*.
- 6 2020;8(3):e17776.
- 7 45. Stephani V, Opoku D, Quentin W. A systematic review of randomized controlled trials of
- 8 mHealth interventions against non-communicable diseases in developing countries. *BMC*
- 9 *public health*. 2016;16:572.
- 10 46. Beratarrechea A, Moyano D, Irazola V, Rubinstein A. mHealth Interventions to Counter
- 11 Noncommunicable Diseases in Developing Countries: Still an Uncertain Promise. *Cardiol Clin*.
- 12 2017;35(1):13-30.
- 13 47. Patel A, Praveen D, Maharani A, et al. Association of Multifaceted Mobile Technology-
- 14 Enabled Primary Care Intervention With Cardiovascular Disease Risk Management in Rural
- 15 Indonesia. *JAMA Cardiol*. 2019;4(10):978-986.
- 16 48. Jafar TH, Ramakrishnan C, John O, et al. Access to CKD Care in Rural Communities of India: a
- 17 qualitative study exploring the barriers and potential facilitators. *BMC nephrology*.
- 18 2020;21(1):26.
- 19 49. Langarizadeh M, Moghbeli F, Aliabadi A. Application of Ethics for Providing Telemedicine
- 20 Services and Information Technology. *Med Arch*. 2017;71(5):351-355.
- 21 50. Rinaldi G, Hijazi A, Haghparast-Bidgoli H. Cost and cost-effectiveness of mHealth
- 22 interventions for the prevention and control of type 2 diabetes mellitus: A systematic
- 23 review. *Diabetes research and clinical practice*. 2020;162:108084.
- 24 51. Pew Research Center. Smartphone Ownership Is Growing Rapidly Around the World, but Not
- 25 Always Equally. [https://www.pewresearch.org/global/2019/02/05/smartphone-ownership-](https://www.pewresearch.org/global/2019/02/05/smartphone-ownership-is-growing-rapidly-around-the-world-but-not-always-equally/)
- 26 [is-growing-rapidly-around-the-world-but-not-always-equally/](https://www.pewresearch.org/global/2019/02/05/smartphone-ownership-is-growing-rapidly-around-the-world-but-not-always-equally/). Accessed 23 December 2020.
- 27 52. Filkins BL, Kim JY, Roberts B, et al. Privacy and security in the era of digital health: what
- 28 should translational researchers know and do about it? *Am J Transl Res*. 2016;8(3):1560-
- 29 1580.
- 30 53. Kruse CS, Kristof C, Jones B, Mitchell E, Martinez A. Barriers to Electronic Health Record
- 31 Adoption: a Systematic Literature Review. *Journal of medical systems*. 2016;40(12):252.
- 32 54. Fennelly O, Cunningham C, Grogan L, et al. Successfully implementing a national electronic
- 33 health record: a rapid umbrella review. *International journal of medical informatics*.
- 34 2020;144:104281.
- 35 55. Safie N, Aljunid S. E-learning initiative capacity building for healthcare workforce of
- 36 developing countries. *Journal of Computer Science*. 2013;9(5):583.
- 37 56. Frenk J, Chen L, Bhutta ZA, et al. Health professionals for a new century: transforming
- 38 education to strengthen health systems in an interdependent world. *Lancet (London,*
- 39 *England)*. 2010;376(9756):1923-1958.
- 40 57. Webster P. Virtual health care in the era of COVID-19. *Lancet (London, England)*.
- 41 2020;395(10231):1180-1181.
- 42 58. Olum R, Atulinda L, Kigozi E, et al. Medical Education and E-Learning During COVID-19
- 43 Pandemic: Awareness, Attitudes, Preferences, and Barriers Among Undergraduate Medicine
- 44 and Nursing Students at Makerere University, Uganda. *J Med Educ Curric Dev*.
- 45 2020;7:2382120520973212.
- 46 59. Dost S, Hossain A, Shehab M, Abdelwahed A, Al-Nusair L. Perceptions of medical students
- 47 towards online teaching during the COVID-19 pandemic: a national cross-sectional survey of
- 48 2721 UK medical students. *BMJ open*. 2020;10(11):e042378.
- 49
- 50
- 51
- 52
- 53
- 54
- 55
- 56
- 57
- 58
- 59
- 60

## FIGURE LEGENDS

**Figure 1:** Proportion of mobile-cellular users and internet access across ISN regions

**Figure 2(A – E):** (A) Availability of national EHR system, (B - E) Availability of other electronic health record systems (laboratory information systems, pathology information systems, PACS systems, and pharmacy information systems)  
Abbreviations: EHR – electronic health records, PACS - picture archiving and communication system)

### Supplementary Materials:

**Table S1:** List of participating countries by ISN regions

**Table S2:** mHealth for accessing services

**Figure S1:** National eHealth policies / strategies across ISN regions

**Figure S2:** Funding sources for eHealth by income groups

**Figure S3:** eHealth capacity building

**Figure S4:** Use of e-learning in health sciences across ISN regions

**Figure S5:** Health facilities with EHR in ISN regions

**Figure S6:** Availability of human resources for Health Information Systems

**Figure S7:** Legal framework for eHealth across income groups

**Figure S8:** Health care organizations use of social media across ISN regions

**Figure S9:** Policy / strategy governing the use of big data

**Table 1:** Features of participating countries ranked according to ISN regions and World Bank groups

|                                       | Total population of participating countries (millions)* | GNI per capita (PPP Int \$) * | Physician density (per 10,000 population) | Nurse & midwife density (per 10,000 population) | Hospital bed density (per 10,000 population) | Life expectancy at birth (years) | Total health expenditure (% GDP) | ICT Development Index** |
|---------------------------------------|---------------------------------------------------------|-------------------------------|-------------------------------------------|-------------------------------------------------|----------------------------------------------|----------------------------------|----------------------------------|-------------------------|
| <b>Overall (n=125)</b>                | 4,389.9                                                 | 18220 (18722)                 | 1.63 (0.31-3.24)                          | 2.53 (0.74-6.11)                                | 28 (13-49)                                   | 74 (66-78)                       | 6.7 (5.4-8.9)                    | 4.8 (2.9-6.9)           |
| <b>ISN regions:</b>                   |                                                         |                               |                                           |                                                 |                                              |                                  |                                  |                         |
| -Africa (n=33)                        | 600.7                                                   | 4873 (6190)                   | 0.11 (0.06-0.29)                          | 0.68 (0.42-0.91)                                | 13 (5-20)                                    | 60 (57-64)                       | 5.7 (4.4-7.1)                    | 2.3 (1.6-3.7)           |
| -Eastern & Central Europe (n=17)      | 197.2                                                   | 18943 (6815)                  | 2.39 (2.02-3.38)                          | 5.50 (4.16-6.27)                                | 54 (39-66)                                   | 75 (74-77)                       | 7.2 (5.9-8.0)                    | 6.4 (5.8-6.9)           |
| -Latin America & the Caribbean (n=14) | 330.6                                                   | 12952 (5452)                  | 1.48 (1.11-2.10)                          | 1.04 (0.62-1.51)                                | 14 (10-21)                                   | 77 (74-78)                       | 7.3 (6.4-8.8)                    | 4.4 (3.6-6.0)           |
| -Middle East (n=8)                    | 152.3                                                   | 38863 (40229)                 | 1.95 (0.91-2.88)                          | 2.72 (1.87-5.38)                                | 18 (14-18)                                   | 76 (74-78)                       | 5.1 (3.0-7.0)                    | 5.9 (4.7-6.8)           |
| -NIS & Russia (n=11)                  | 278.4                                                   | 11351 (7072)                  | 3.47 (2.53-3.93)                          | 7.11 (5.02-9.04)                                | 52 (40-87)                                   | 69 (69-72)                       | 6.1 (4.5-6.8)                    | 5.3 (5.2-6.4)           |
| -North America (n=4)                  | 359.4                                                   | 32815 (19823)                 | 1.63 (0.79-2.26)                          | 6.42 (2.33-9.55)                                | 28 (23-31)                                   | 77 (73-81)                       | 8.4 (5.7-14.0)                   | 6.6 (4.9-7.9)           |
| -North and East Asia (n=4)            | 1,548.2                                                 | 19430 (15835)                 | 2.57 (1.90-3.06)                          | 3.87 (2.64-7.80)                                | 95 (50-135)                                  | 73 (69-80)                       | 6.0 (5.6-10.3)                   | 4.8 (4.5-8.3)           |
| -Oceania & South East Asia (n=10)     | 276.2                                                   | 20210 (24142)                 | 1.17 (0.18-1.95)                          | 3.50 (1.11-6.00)                                | 23 (14-31)                                   | 74 (67-82)                       | 5.3 (4.0-9.4)                    | 4.0 (2.8-7.9)           |
| -South Asia (n=5)                     | 370.4                                                   | 5366 (3238)                   | 0.36 (0.27-0.83)                          | 0.57 (0.50-0.98)                                | 6 (4-18)                                     | 68 (66-71)                       | 3.7 (3.6-8.1)                    | 2.3 (2.2-3.1)           |
| -Western Europe (n=19)                | 276.6                                                   | 40262 (11395)                 | 3.49 (3.15-4.10)                          | 8.80 (4.96-15.20)                               | 46 (33-56)                                   | 81 (81-82)                       | 9.4 (8.9-10.6)                   | 7.9 (7.5-8.5)           |
| <b>World Bank Groups:</b>             |                                                         |                               |                                           |                                                 |                                              |                                  |                                  |                         |
| -Low income (n=19)                    | 353.6                                                   | 1390 (429)                    | 0.07 (0.04-0.12)                          | 0.53 (0.26-0.77)                                | 10 (4-17)                                    | 59 (56-62)                       | 6.2 (4.8-8.1)                    | 1.6 (1.3-1.9)           |
| -Lower-middle income (n=30)           | 899.9                                                   | 4816 (2102)                   | 0.38 (0.17-1.60)                          | 0.90 (0.62-3.71)                                | 14 (7-31)                                    | 69 (64-72)                       | 5.8 (4.2-6.9)                    | 3.1 (2.4-4.0)           |
| -Upper-middle income (n=34)           | 2,200.5                                                 | 14547 (4236)                  | 1.49 (1.15-2.56)                          | 3.28 (1.41-5.41)                                | 27 (17-54)                                   | 74 (72-76)                       | 6.3 (5.4-7.2)                    | 4.7 (4.4-5.9)           |
| -High income (n=42)                   | 936.0                                                   | 38213 (19296)                 | 3.27 (2.43-3.78)                          | 6.27 (4.46-10.86)                               | 38 (32-56)                                   | 81 (77-82)                       | 8.9 (6.7-9.7)                    | 7.5 (6.8-8.1)           |

\* - data expressed as mean (SD); all other data represent median and interquartile ranges (IQR)

§ - (per 10,000 population)

\*\* - Data from the World Bank (2015)

GNI – gross national income; PPP – purchasing power parity; GDP – gross domestic product; ICT – Information and communications technology

**Table 2:** Remote patient monitoring [n (%)]

|                                       | Health system level* |          |          |              |                           |             | Programme type** |        |             |             |
|---------------------------------------|----------------------|----------|----------|--------------|---------------------------|-------------|------------------|--------|-------------|-------------|
|                                       | International        | Regional | National | Intermediate | Local or peripheral level | No response | Informal         | Pilot  | Established | No response |
| <b>Overall (n=125)</b>                | 4(3)                 | 4(3)     | 19(15)   | 21(17)       | 28(22)                    | 65(52)      | 12(10)           | 38(30) | 15(12)      | 67(54)      |
| <b>ISN regions:</b>                   |                      |          |          |              |                           |             |                  |        |             |             |
| -Africa (n=33)                        | 2(6)                 | 0(0)     | 3(9)     | 2(6)         | 4(12)                     | 25(76)      | 2(6)             | 5(15)  | 1(3)        | 25(76)      |
| -Eastern & Central Europe (n=17)      | 1(6)                 | 1(6)     | 3(18)    | 2(12)        | 5(29)                     | 6(35)       | 2(12)            | 9(53)  | 0(0)        | 6(35)       |
| -Latin America & the Caribbean (n=14) | 0(0)                 | 0(0)     | 1(7)     | 1(7)         | 4(29)                     | 9(64)       | 1(7)             | 4(29)  | 1(7)        | 9(64)       |
| -Middle East (n=8)                    | 0(0)                 | 0(0)     | 0(0)     | 2(25)        | 1(13)                     | 5(63)       | 1(13)            | 1(13)  | 1(13)       | 5(63)       |
| -NIS & Russia (n=11)                  | 0(0)                 | 1(9)     | 2(18)    | 3(27)        | 2(18)                     | 5(45)       | 3(27)            | 3(27)  | 1(9)        | 5(45)       |
| -North America (n=4)                  | 0(0)                 | 0(0)     | 0(0)     | 2(50)        | 1(25)                     | 2(50)       | 0(0)             | 1(25)  | 1(25)       | 3(75)       |
| -North and East Asia (n=4)            | 0(0)                 | 0(0)     | 2(50)    | 0(0)         | 1(25)                     | 1(25)       | 0(0)             | 1(25)  | 1(25)       | 2(50)       |
| -Oceania & South East Asia (n=10)     | 0(0)                 | 0(0)     | 0(0)     | 0(0)         | 3(30)                     | 7(70)       | 0(0)             | 3(30)  | 0(0)        | 7(70)       |
| -South Asia (n=5)                     | 1(20)                | 0(0)     | 1(20)    | 1(20)        | 0(0)                      | 2(40)       | 0(0)             | 2(40)  | 1(20)       | 2(40)       |
| -Western Europe (n=19)                | 0(0)                 | 2(11)    | 7(37)    | 8(42)        | 7(37)                     | 3(16)       | 3(16)            | 9(47)  | 8(42)       | 3(16)       |
| <b>World Bank Groups:</b>             |                      |          |          |              |                           |             |                  |        |             |             |
| -Low income (n=19)                    | 0(0)                 | 0(0)     | 3(16)    | 1(5)         | 2(11)                     | 13(68)      | 1(5)             | 3(16)  | 1(5)        | 14(74)      |
| -Lower-middle income (n=30)           | 2(7)                 | 1(3)     | 3(10)    | 3(10)        | 3(10)                     | 21(70)      | 3(10)            | 6(20)  | 1(3)        | 21(70)      |
| -Upper-middle income (n=34)           | 0(0)                 | 0(0)     | 3(9)     | 4(12)        | 6(18)                     | 22(65)      | 2(6)             | 9(26)  | 2(6)        | 22(65)      |
| -High income (n=42)                   | 2(5)                 | 3(7)     | 10(24)   | 13(31)       | 17(40)                    | 9(21)       | 6(14)            | 20(48) | 11(26)      | 10(24)      |

\*

**International level** – health entities in other countries in the world**Regional level** – health entities in countries in the same geographic region**National level** – referral hospitals, laboratories, and health institutes**Intermediate level, covering district or provincial facilities** – public, private for-profit and private not-for-profit (e.g., religious) hospitals and health centres**Local or peripheral level** – health posts, health centres providing basic level of care

\*\*

**Informal** – use of ICT for health purposes in the absence of formal processes and policies**Pilot** – testing and evaluating a programme**Established** – an ongoing programme that has been conducted for a minimum of 2 years and is planned to continue.

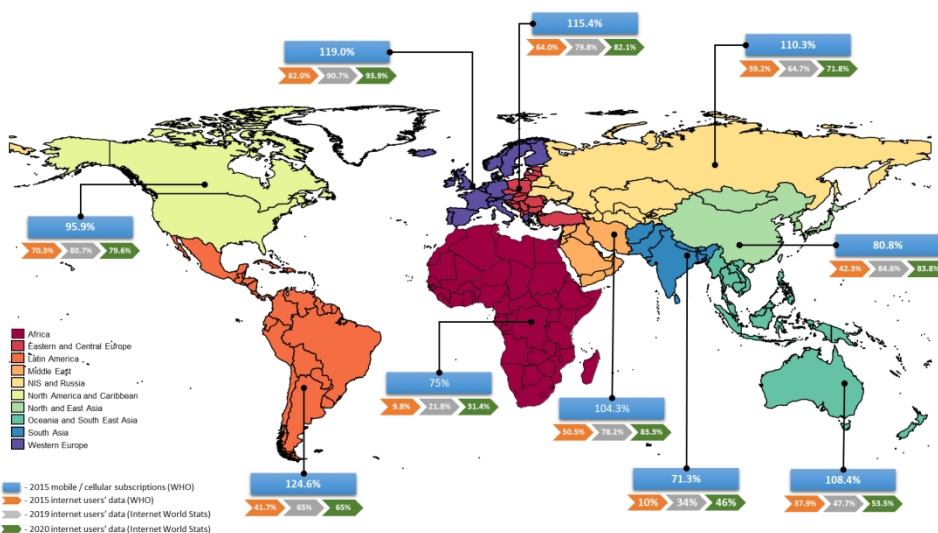

Figure 1

84x47mm (603 x 603 DPI)

1  
2  
3  
4  
5  
6  
7  
8  
9  
10  
11  
12  
13  
14  
15  
16  
17  
18  
19  
20  
21  
22  
23  
24  
25  
26  
27  
28  
29  
30  
31  
32  
33  
34  
35  
36  
37  
38  
39  
40  
41  
42  
43  
44  
45  
46  
47  
48  
49  
50  
51  
52  
53  
54  
55  
56  
57  
58  
59  
60

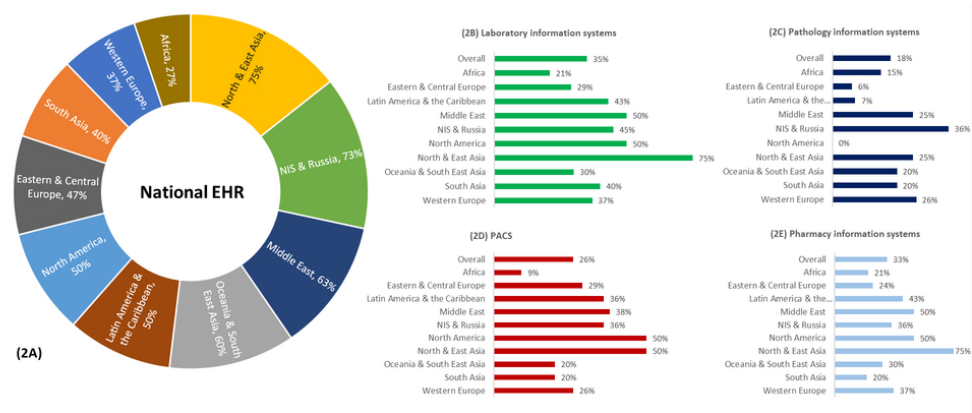

Figure 2

83x34mm (300 x 300 DPI)



## Supplementary Materials:

### Supplementary Table S1: List of participating countries by ISN regions

|                          | Africa            | EC Europe              | Latin America      | Middle East          | NIS & Russia       | North America       | North East Asia           | OSEA        | South Asia  | Western Europe |
|--------------------------|-------------------|------------------------|--------------------|----------------------|--------------------|---------------------|---------------------------|-------------|-------------|----------------|
| Benin                    | Cabo Verde        | Moldova                | El Salvador        | Syrian Arab Republic | Armenia            | Jamaica             | Korea, Dem. People's Rep. | Cambodia    | Afghanistan | Austria        |
| Burkina Faso             | Cote d'Ivoire     | Albania                | Guatemala          | Iran, Islamic Rep.   | Georgia            | Canada              | China                     | Kiribati    | Bangladesh  | Belgium        |
| Burundi                  | Ghana             | Bosnia and Herzegovina | Honduras           | Iraq                 | Kyrgyz Republic    | Trinidad and Tobago | Mongolia                  | Lao PDR     | Bhutan      | Denmark        |
| Central African Republic | Kenya             | Bulgaria               | Colombia           | Jordan               | Tajikistan         | United States       | Japan                     | Philippines | Pakistan    | Finland        |
| Comoros                  | Lesotho           | Montenegro             | Costa Rica         | Lebanon              | Ukraine            |                     |                           | Timor-Leste | Maldives    | Greece         |
| Ethiopia                 | Mauritania        | Romania                | Cuba               | Bahrain              | Uzbekistan         |                     |                           | Vietnam     |             | Iceland        |
| Gambia, The              | Morocco           | Serbia                 | Dominican Republic | Oman                 | Azerbaijan         |                     |                           | Malaysia    |             | Ireland        |
| Guinea-Bissau            | Senegal           | Turkey                 | Mexico             | Qatar                | Belarus            |                     |                           | Australia   |             | Israel         |
| Madagascar               | Sudan             | Croatia                | Panama             |                      | Kazakhstan         |                     |                           | New Zealand |             | Italy          |
| Malawi                   | Zambia            | Cyprus                 | Paraguay           |                      | Russian Federation |                     |                           | Singapore   |             | Luxembourg     |
| Mali                     | Algeria           | Czech Republic         | Peru               |                      | Turkmenistan       |                     |                           |             |             | Malta          |
| Niger                    | Botswana          | Estonia                | Argentina          |                      |                    |                     |                           |             |             | Netherlands    |
| Rwanda                   | Equatorial Guinea | Hungary                | Chile              |                      |                    |                     |                           |             |             | Norway         |
| Somalia                  | South Africa      | Latvia                 | Uruguay            |                      |                    |                     |                           |             |             | Portugal       |
| South Sudan              | Tunisia           | Lithuania              |                    |                      |                    |                     |                           |             |             | San Marino     |
| Uganda                   | Seychelles        | Poland                 |                    |                      |                    |                     |                           |             |             | Spain          |
| Zimbabwe                 |                   | Slovenia               |                    |                      |                    |                     |                           |             |             | Sweden         |
|                          |                   |                        |                    |                      |                    |                     |                           |             |             | Switzerland    |
|                          |                   |                        |                    |                      |                    |                     |                           |             |             | United Kingdom |

OSEA – Oceania and South-East Asia; NIS – Newly Independent States; PDR – Peoples Democratic Republic; EC Europe – East and Central Europe

1  
2  
3  
4  
5  
6  
7  
8  
9  
10  
11  
12  
13  
14  
15  
16  
17  
18  
19  
20  
21  
22  
23  
24  
25  
26  
27  
28  
29  
30  
31  
32  
33  
34  
35  
36  
37  
38  
39  
40  
41  
42  
43  
44  
45  
46

**Supplementary Table S2: mHealth for accessing services [n (%)]**

|                                | Toll-free emergency |          |          |              |                           |             | Appointment reminders |          |          |              |                           |             | Treatment adherence |          |          |              |                           |             |
|--------------------------------|---------------------|----------|----------|--------------|---------------------------|-------------|-----------------------|----------|----------|--------------|---------------------------|-------------|---------------------|----------|----------|--------------|---------------------------|-------------|
|                                | International       | Regional | National | Intermediate | Local or peripheral level | No Response | International         | Regional | National | Intermediate | Local or peripheral level | No Response | International       | Regional | National | Intermediate | Local or peripheral level | No Response |
| <b>Overall</b>                 | 3(2)                | 9(7)     | 75(60)   | 20(16)       | 18(14)                    | 31(25)      | 0(0)                  | 8(6)     | 39(31)   | 22(18)       | 38(30)                    | 39(31)      | 1(1)                | 7(6)     | 15(12)   | 23(18)       | 35(28)                    | 65(52)      |
| <b>ISN regions:</b>            |                     |          |          |              |                           |             |                       |          |          |              |                           |             |                     |          |          |              |                           |             |
| -Africa                        | 0(0)                | 1(3)     | 16(48)   | 6(18)        | 4(12)                     | 13(39)      | 0(0)                  | 4(12)    | 12(36)   | 5(15)        | 8(24)                     | 13(39)      | 1(3)                | 4(12)    | 6(18)    | 5(15)        | 9(27)                     | 19(58)      |
| -Eastern & Central Europe      | 0(0)                | 0(0)     | 9(53)    | 1(6)         | 1(6)                      | 6(35)       | 0(0)                  | 0(0)     | 6(35)    | 0(0)         | 6(35)                     | 5(29)       | 0(0)                | 0(0)     | 2(12)    | 3(18)        | 4(24)                     | 8(47)       |
| -Latin America & the Caribbean | 0(0)                | 1(7)     | 11(79)   | 4(29)        | 4(29)                     | 0(0)        | 0(0)                  | 1(7)     | 7(50)    | 2(14)        | 3(21)                     | 3(21)       | 0(0)                | 0(0)     | 1(7)     | 4(29)        | 3(21)                     | 7(50)       |
| -Middle East                   | 0(0)                | 0(0)     | 6(75)    | 0(0)         | 1(13)                     | 1(13)       | 0(0)                  | 0(0)     | 4(50)    | 3(38)        | 1(13)                     | 1(13)       | 0(0)                | 0(0)     | 0(0)     | 1(13)        | 0(0)                      | 7(88)       |
| -NIS & Russia                  | 0(0)                | 3(27)    | 5(45)    | 3(27)        | 3(27)                     | 2(18)       | 0(0)                  | 1(9)     | 1(9)     | 1(9)         | 4(36)                     | 4(36)       | 0(0)                | 1(9)     | 1(9)     | 1(9)         | 4(36)                     | 5(45)       |
| -North America                 | 0(0)                | 0(0)     | 4(100)   | 1(25)        | 1(25)                     | 0(0)        | 0(0)                  | 0(0)     | 1(25)    | 2(50)        | 2(50)                     | 2(50)       | 0(0)                | 0(0)     | 0(0)     | 2(50)        | 2(50)                     | 1(25)       |
| -North and East Asia           | 0(0)                | 0(0)     | 2(50)    | 2(50)        | 1(25)                     | 1(25)       | 0(0)                  | 0(0)     | 0(0)     | 3(75)        | 1(25)                     | 1(25)       | 0(0)                | 0(0)     | 0(0)     | 0(0)         | 1(25)                     | 3(75)       |
| -Oceania & South East Asia     | 1(10)               | 1(10)    | 8(80)    | 1(10)        | 2(20)                     | 2(20)       | 0(0)                  | 0(0)     | 2(20)    | 5(50)        | 3(30)                     | 4(40)       | 0(0)                | 0(0)     | 1(10)    | 3(30)        | 4(40)                     | 5(50)       |
| -South Asia                    | 0(0)                | 0(0)     | 1(20)    | 1(20)        | 0(0)                      | 3(60)       | 0(0)                  | 0(0)     | 1(20)    | 2(40)        | 2(40)                     | 2(40)       | 0(0)                | 1(20)    | 2(40)    | 2(40)        | 1(20)                     | 2(40)       |
| -Western Europe                | 2(11)               | 3(16)    | 13(68)   | 1(5)         | 1(5)                      | 3(16)       | 0(0)                  | 2(11)    | 6(32)    | 3(16)        | 6(32)                     | 4(21)       | 0(0)                | 1(5)     | 2(11)    | 2(11)        | 7(37)                     | 8(42)       |
| <b>World Bank Groups:</b>      |                     |          |          |              |                           |             |                       |          |          |              |                           |             |                     |          |          |              |                           |             |
| -Low income                    | 0(0)                | 1(5)     | 8(42)    | 3(16)        | 2(11)                     | 9(47)       | 0(0)                  | 2(11)    | 5(26)    | 4(21)        | 6(32)                     | 7(37)       | 0(0)                | 2(11)    | 4(21)    | 4(21)        | 4(21)                     | 11(58)      |
| -Lower-middle income           | 1(3)                | 3(10)    | 18(60)   | 5(17)        | 6(20)                     | 6(20)       | 0(0)                  | 2(7)     | 12(40)   | 6(20)        | 8(27)                     | 11(37)      | 1(3)                | 2(7)     | 5(17)    | 5(17)        | 9(30)                     | 17(57)      |
| -Upper-middle income           | 0(0)                | 0(0)     | 17(50)   | 8(24)        | 6(18)                     | 10(29)      | 0(0)                  | 1(3)     | 8(24)    | 5(15)        | 8(24)                     | 14(41)      | 0(0)                | 2(6)     | 3(9)     | 3(9)         | 8(24)                     | 20(59)      |
| -High income                   | 2(5)                | 5(12)    | 32(76)   | 4(10)        | 4(10)                     | 6(14)       | 0(0)                  | 3(7)     | 14(33)   | 7(17)        | 16(38)                    | 7(17)       | 0(0)                | 1(2)     | 3(7)     | 11(26)       | 14(33)                    | 17(40)      |

**Figure S1:** National eHealth policies / strategies across ISN regions

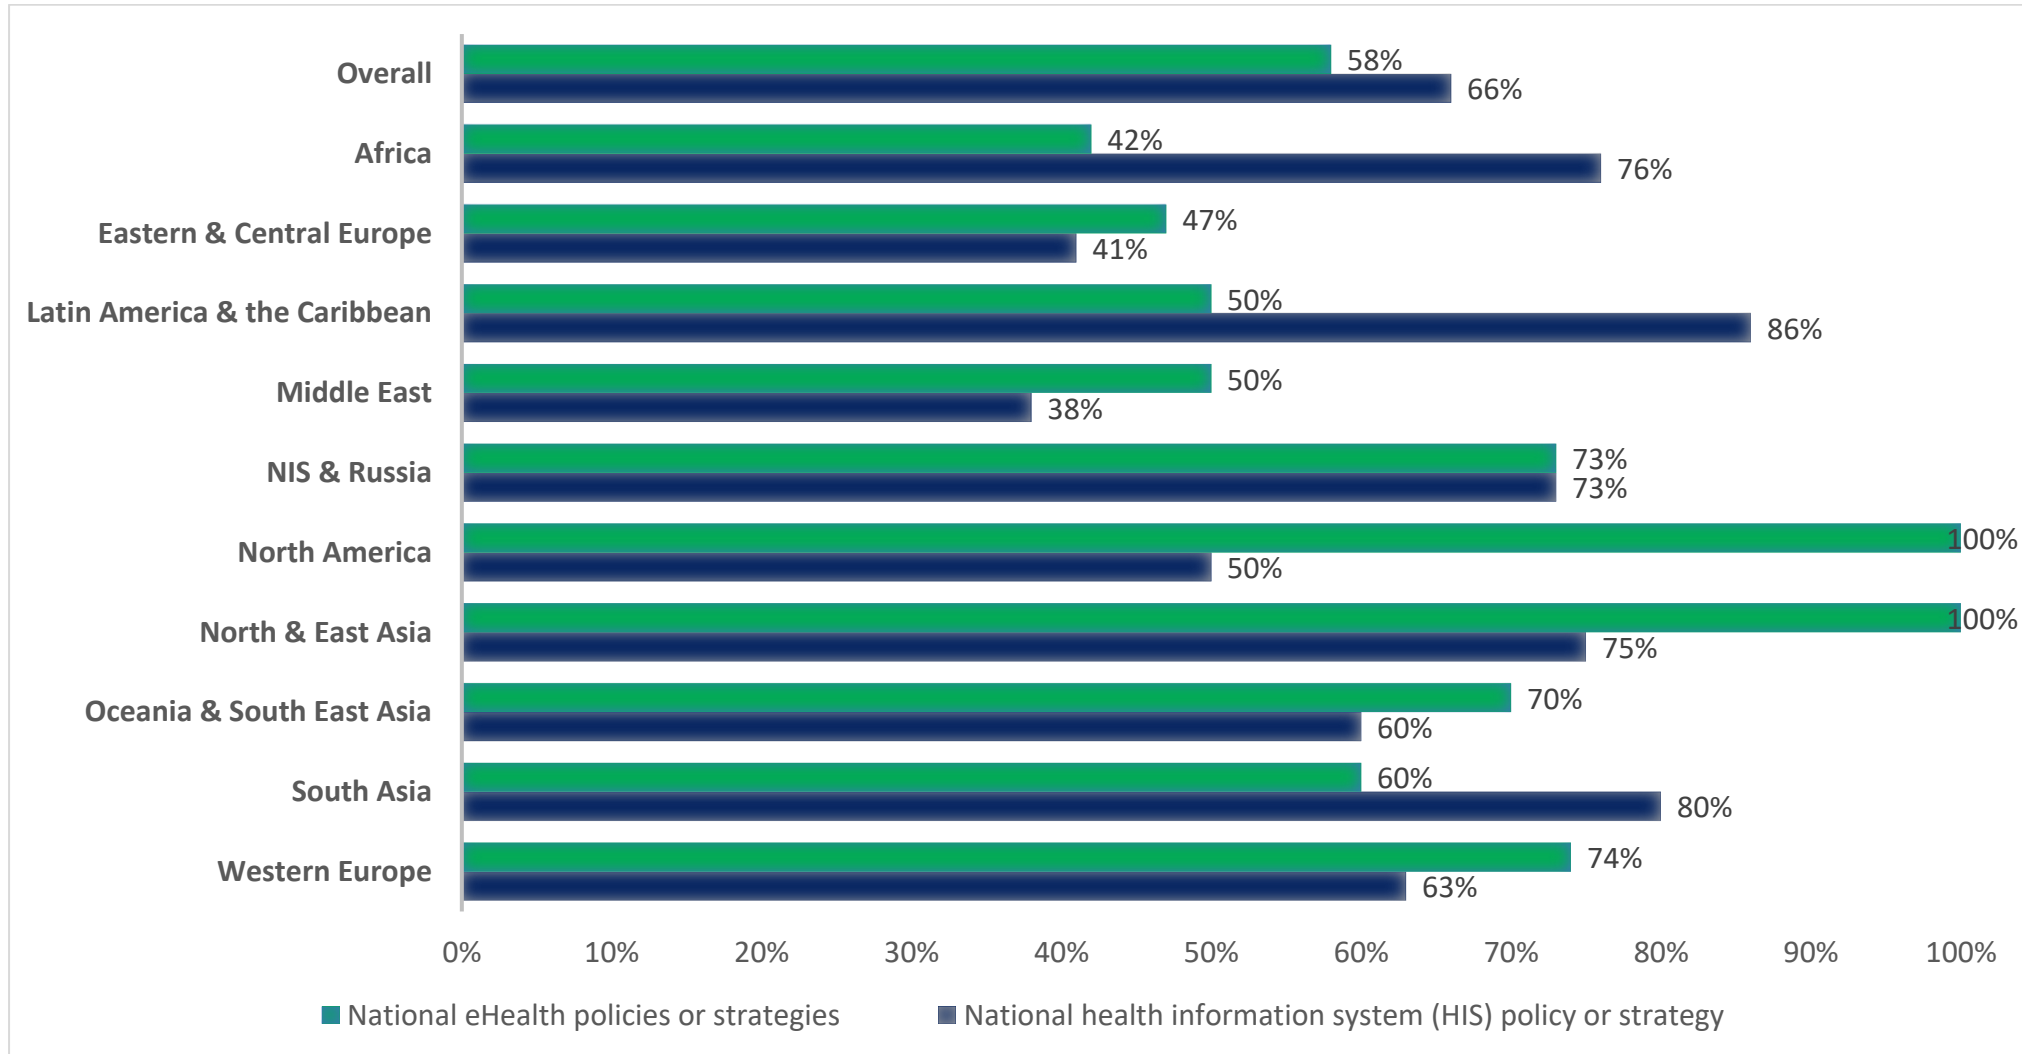

**Figure S2:** Funding sources for eHealth by income groups

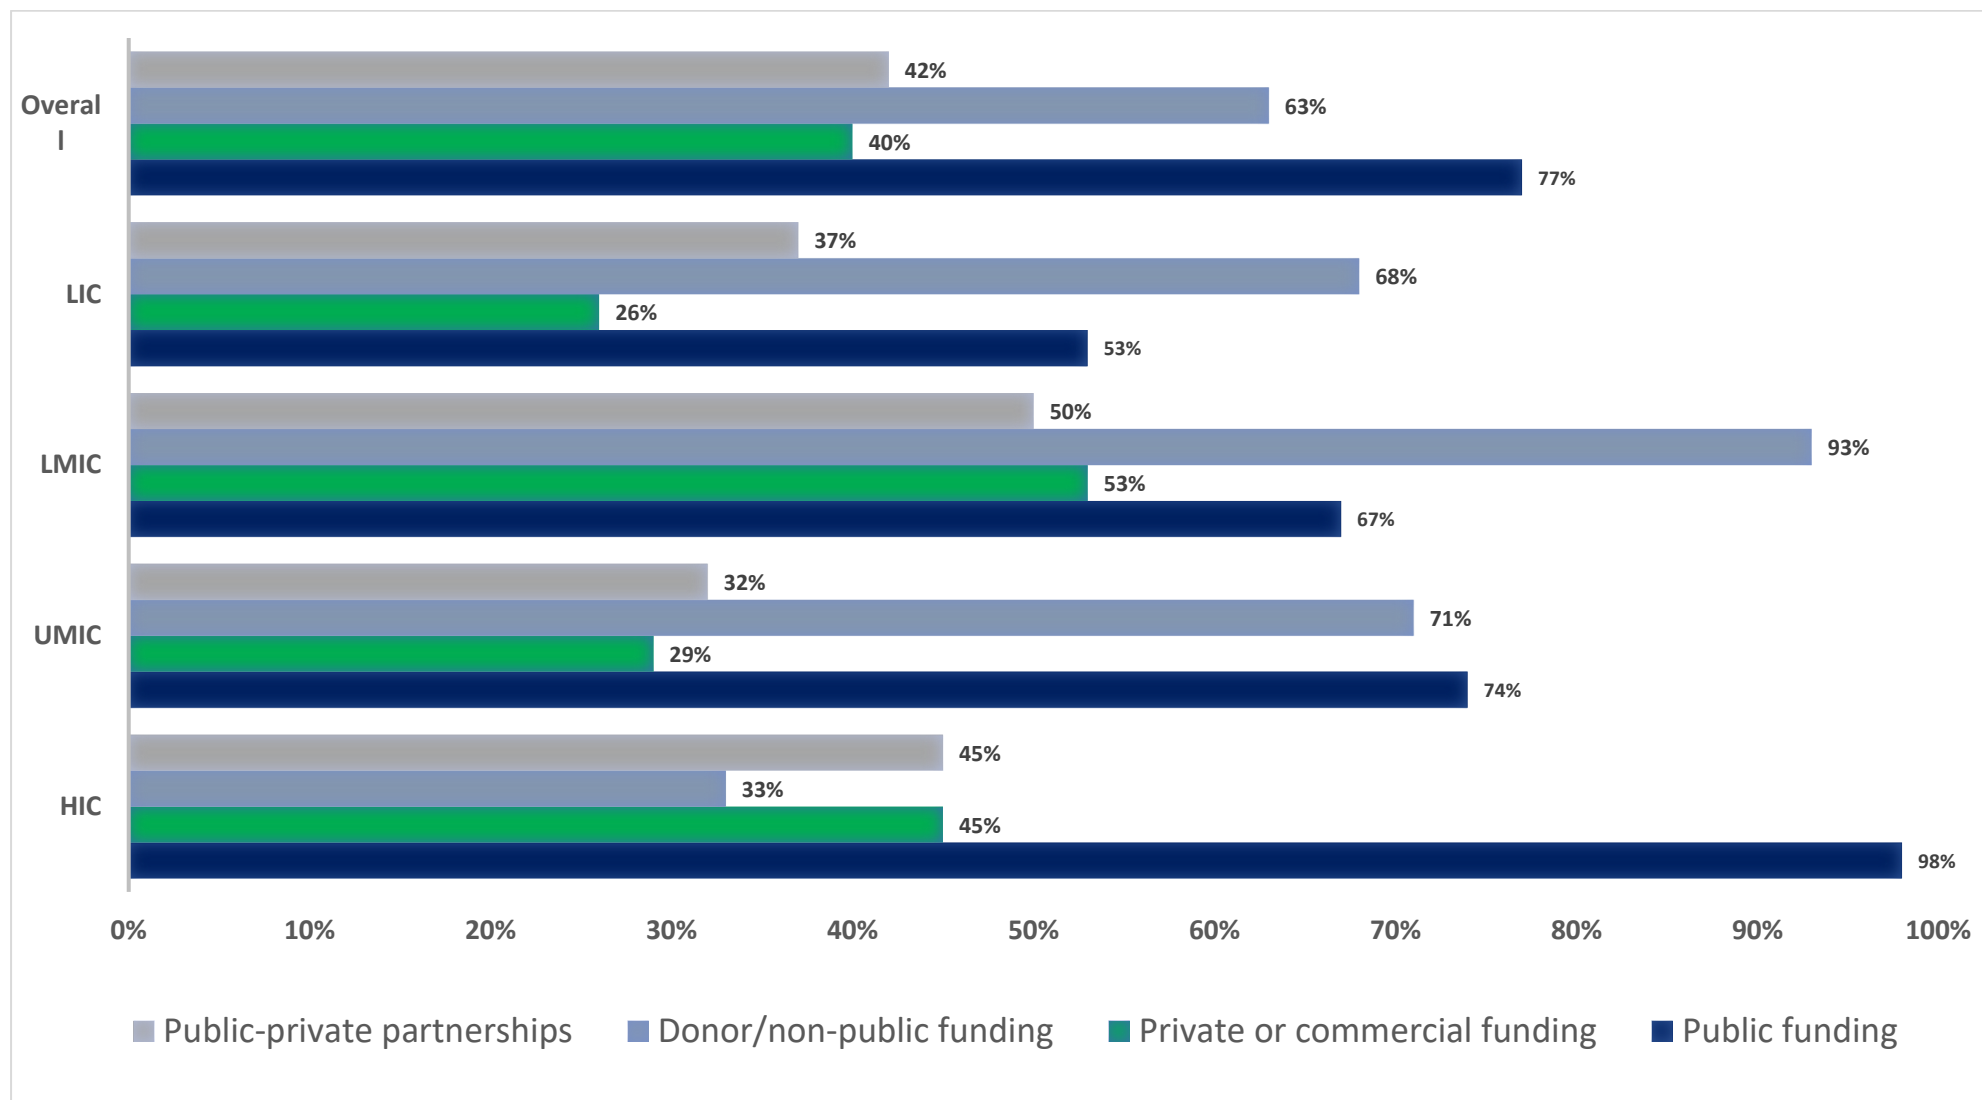

**Figure S3: eHealth capacity building**

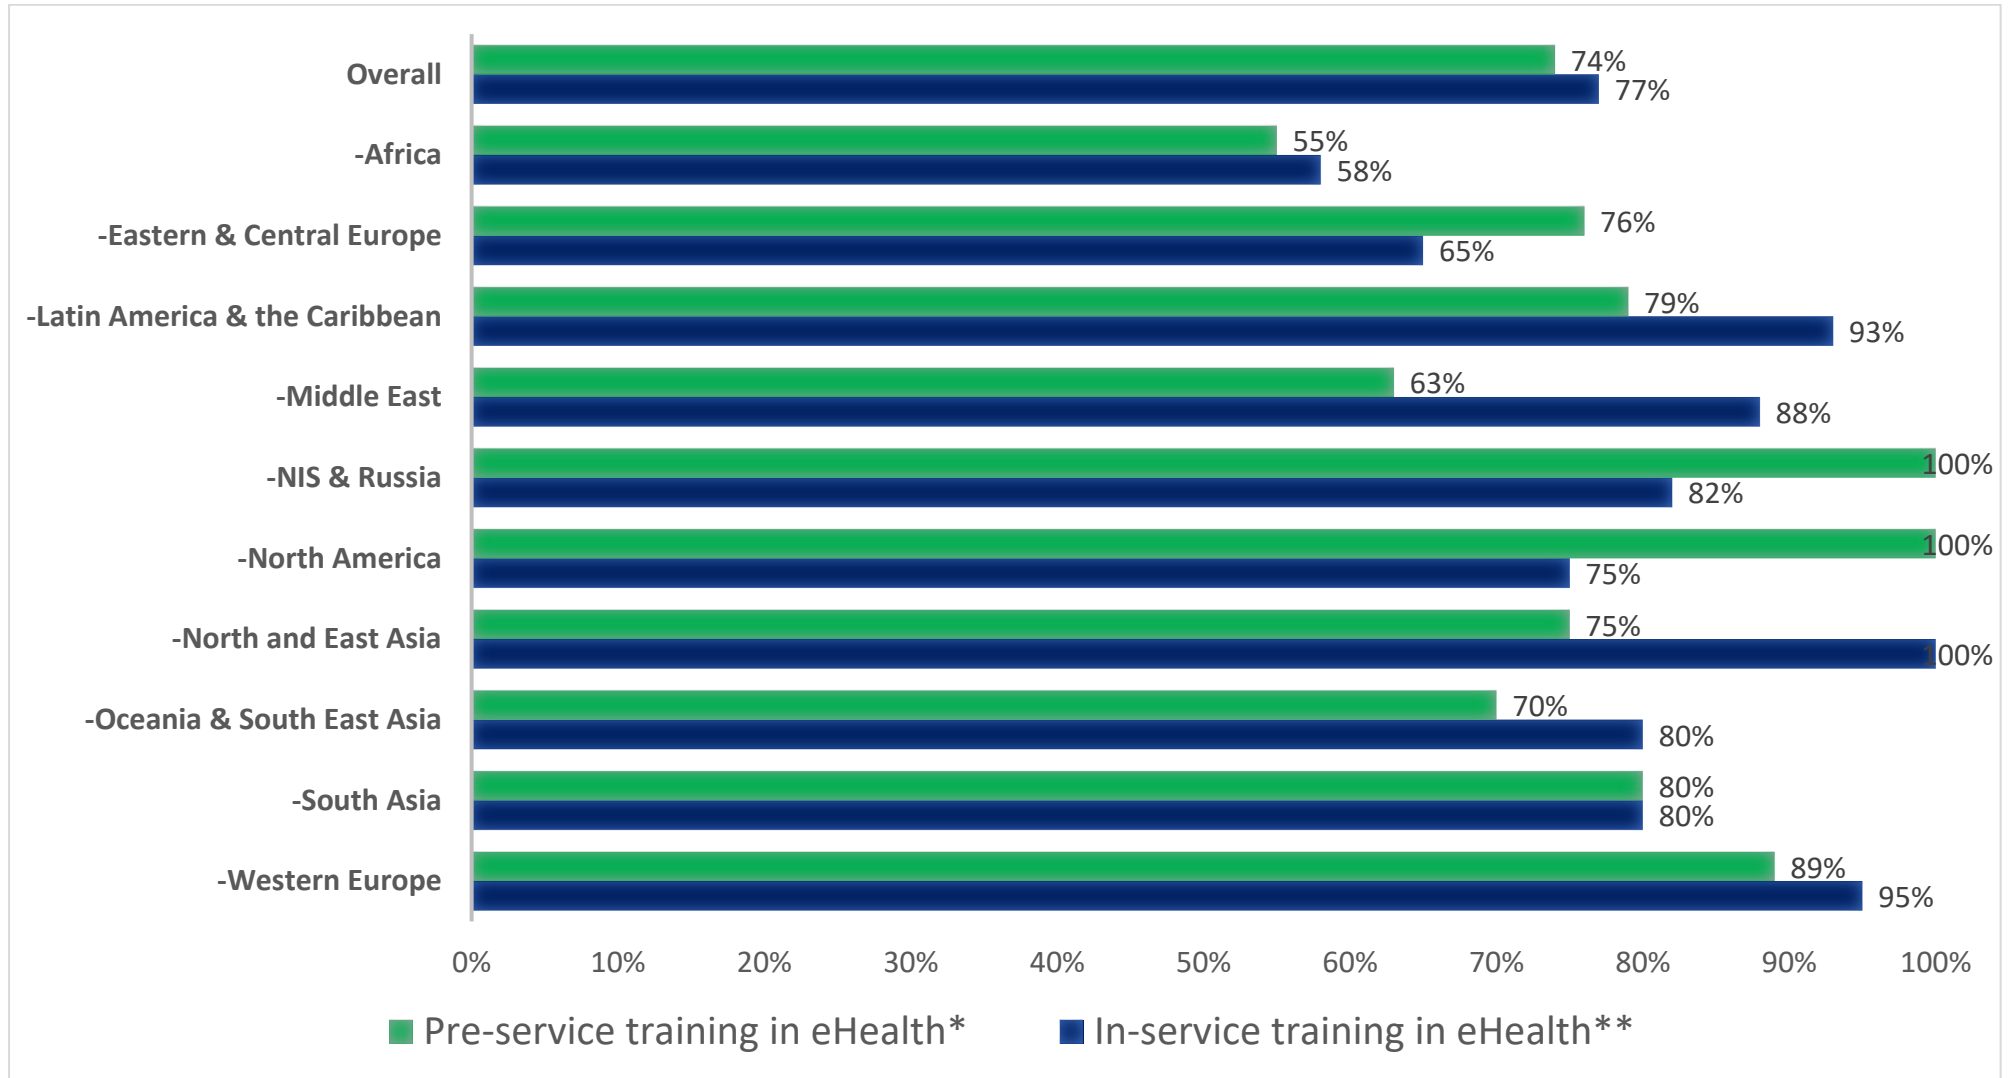

Figure S4: Use of e-learning in health sciences by income groups

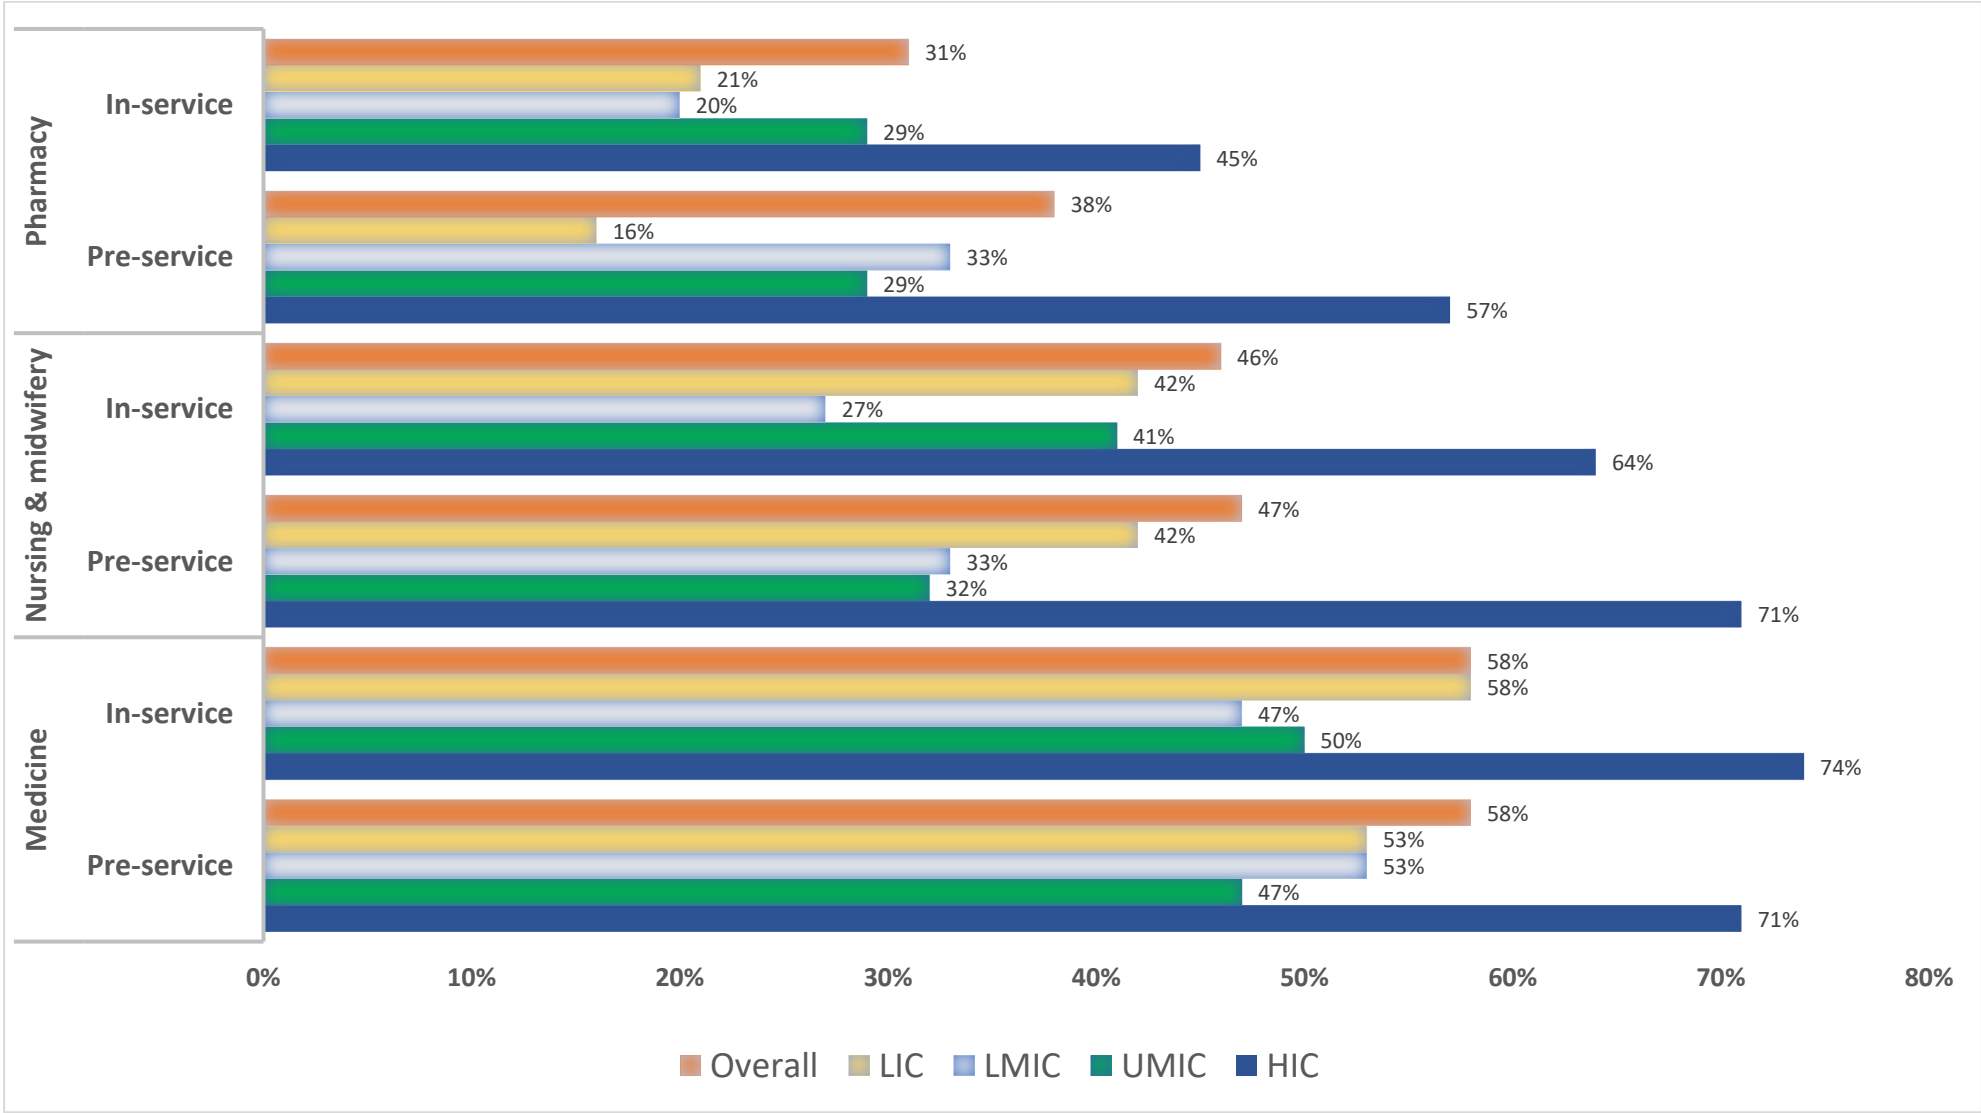

**Figure S5: Health facilities with EHR in ISN regions**

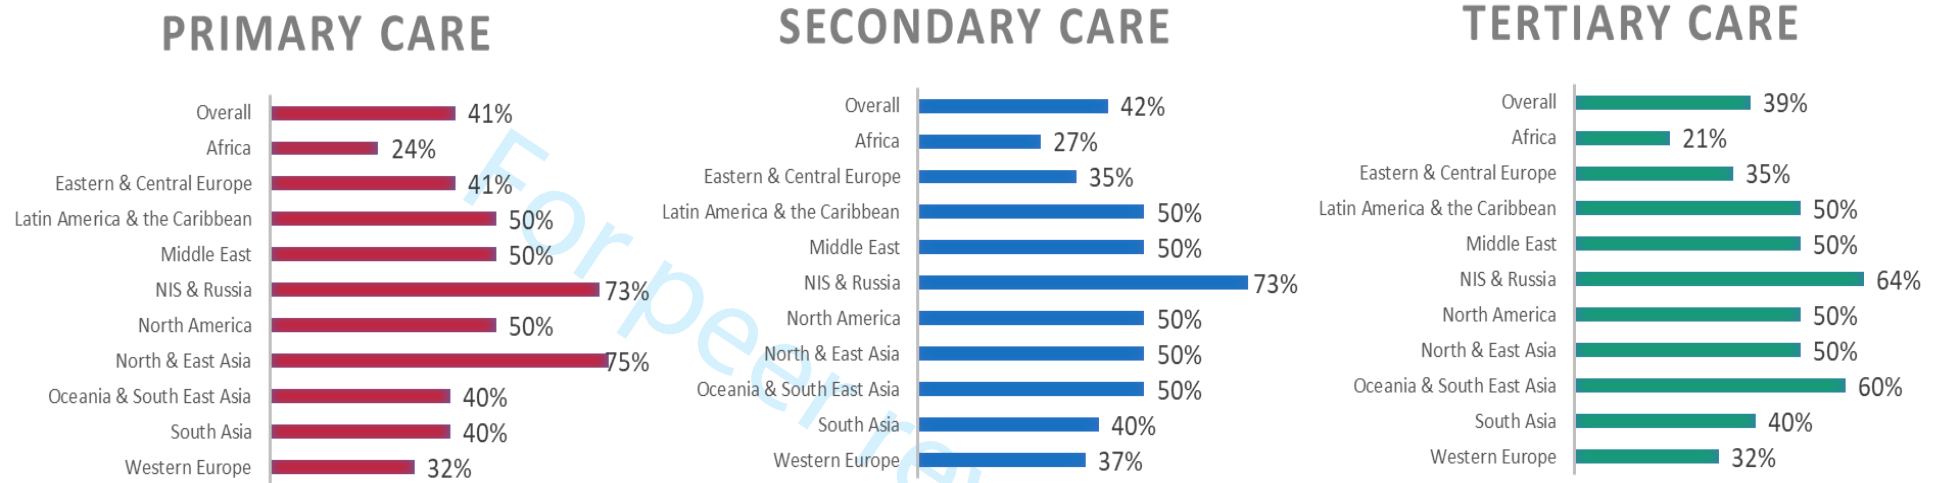

**Figure S6:** Availability of human resources for Health Information Systems

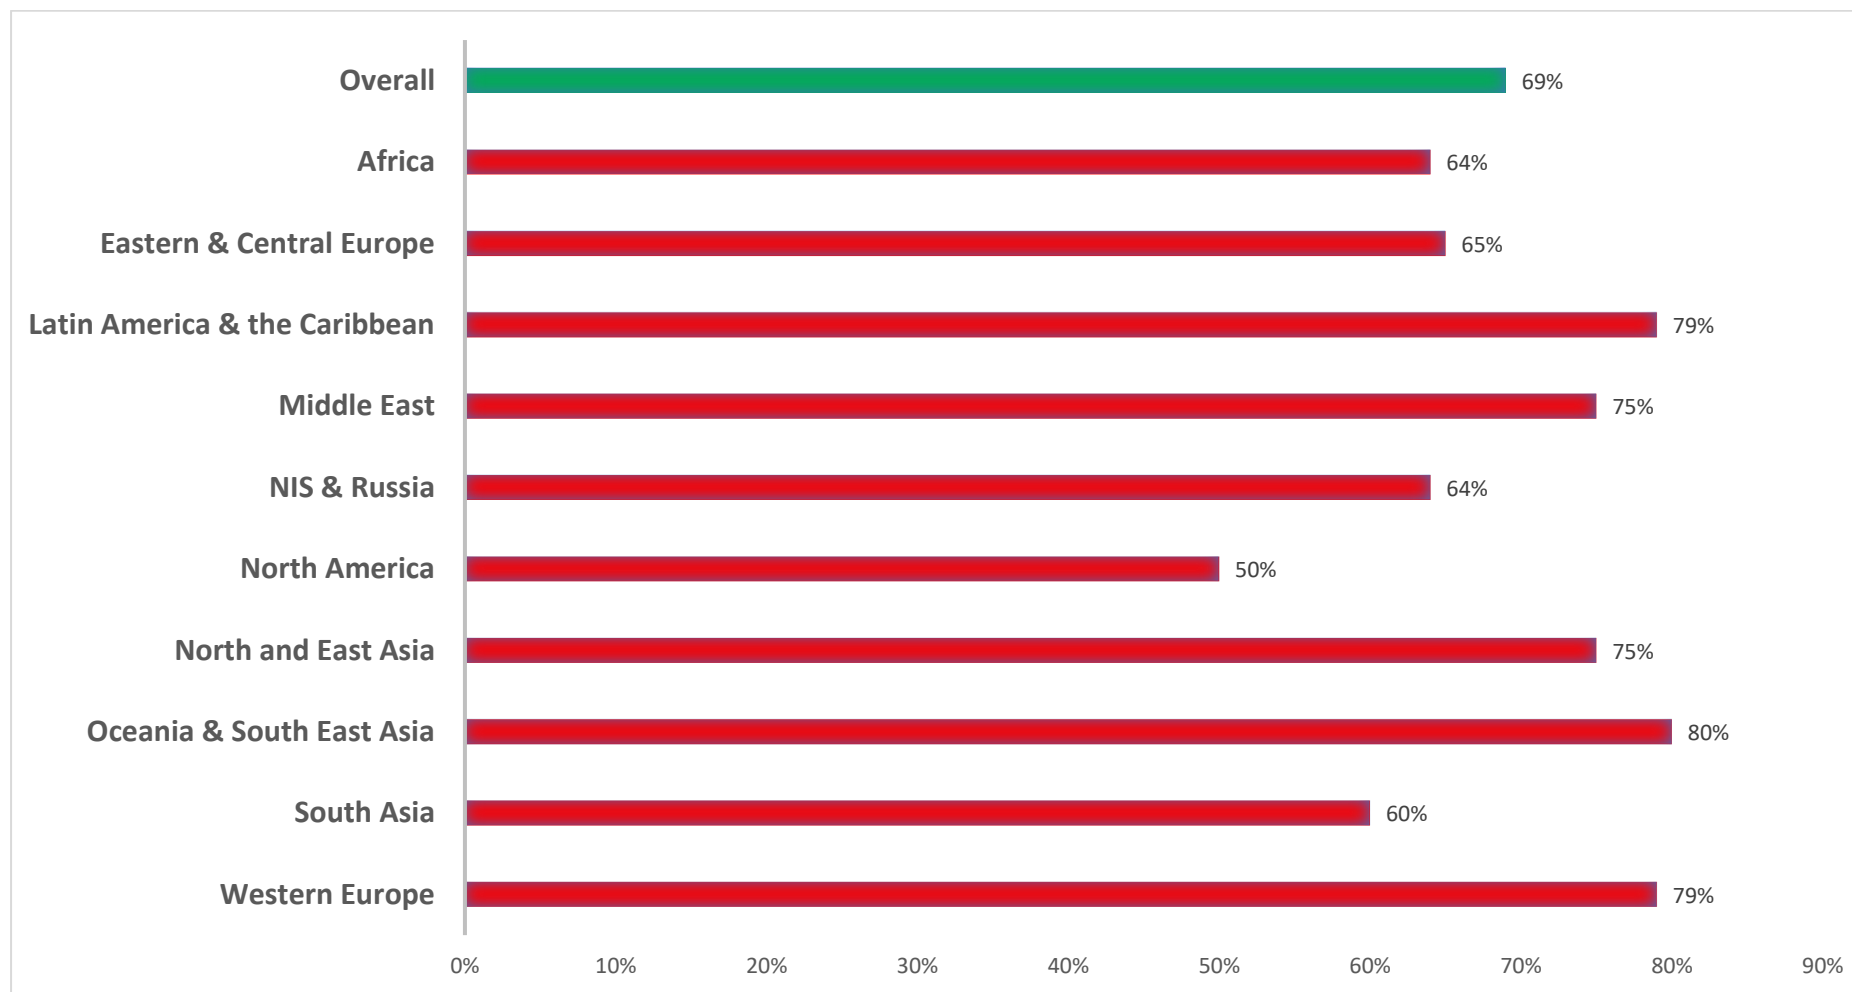



**Figure S7:** Legal framework for eHealth across income groups

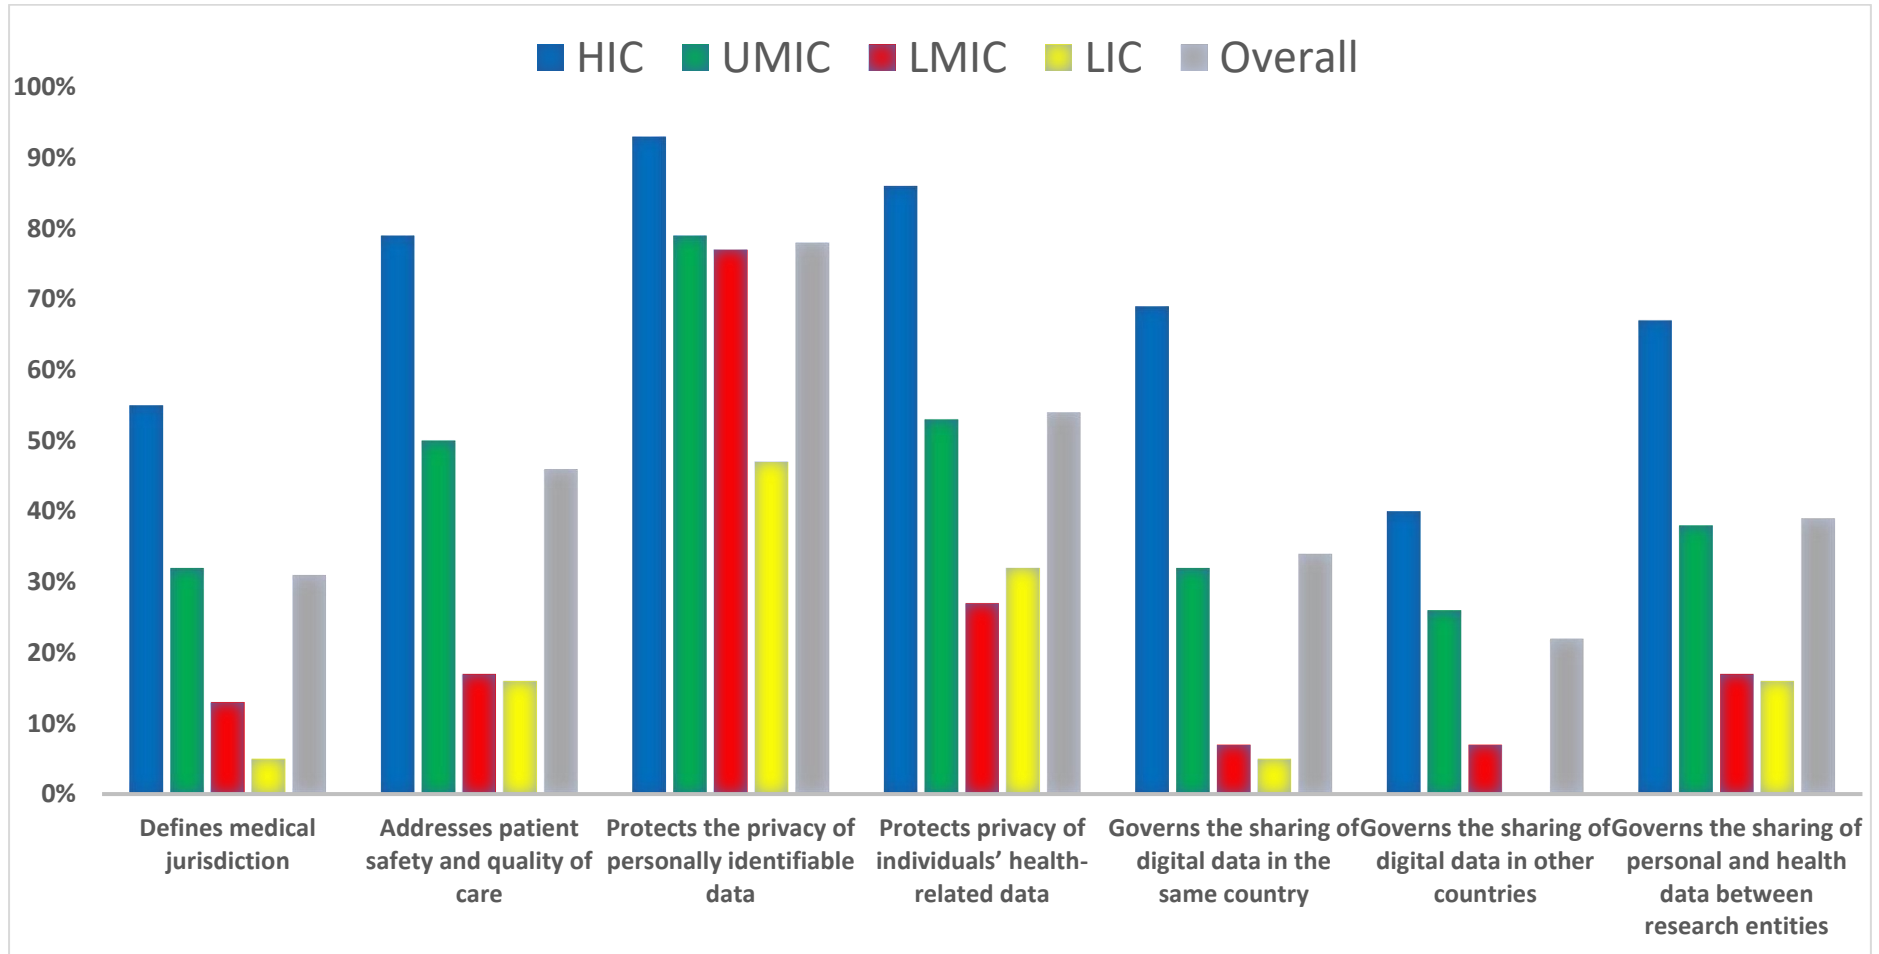

Figure S8: Health care organizations use of social media across ISN regions

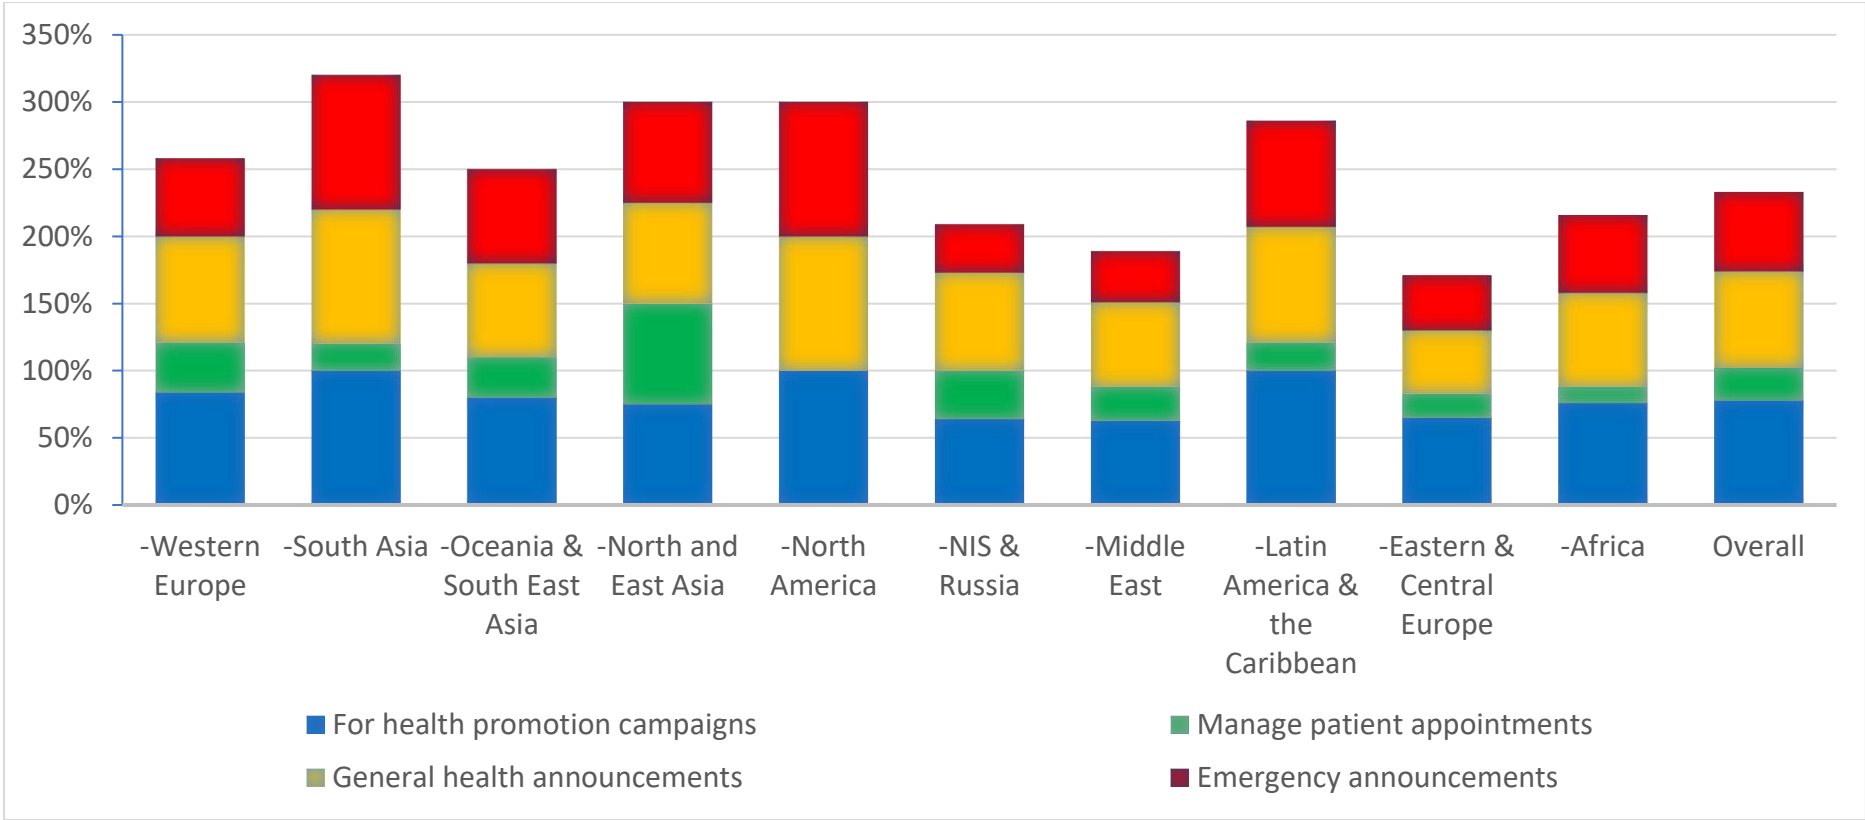

**Figure S9:** Policy / strategy governing the use of big data

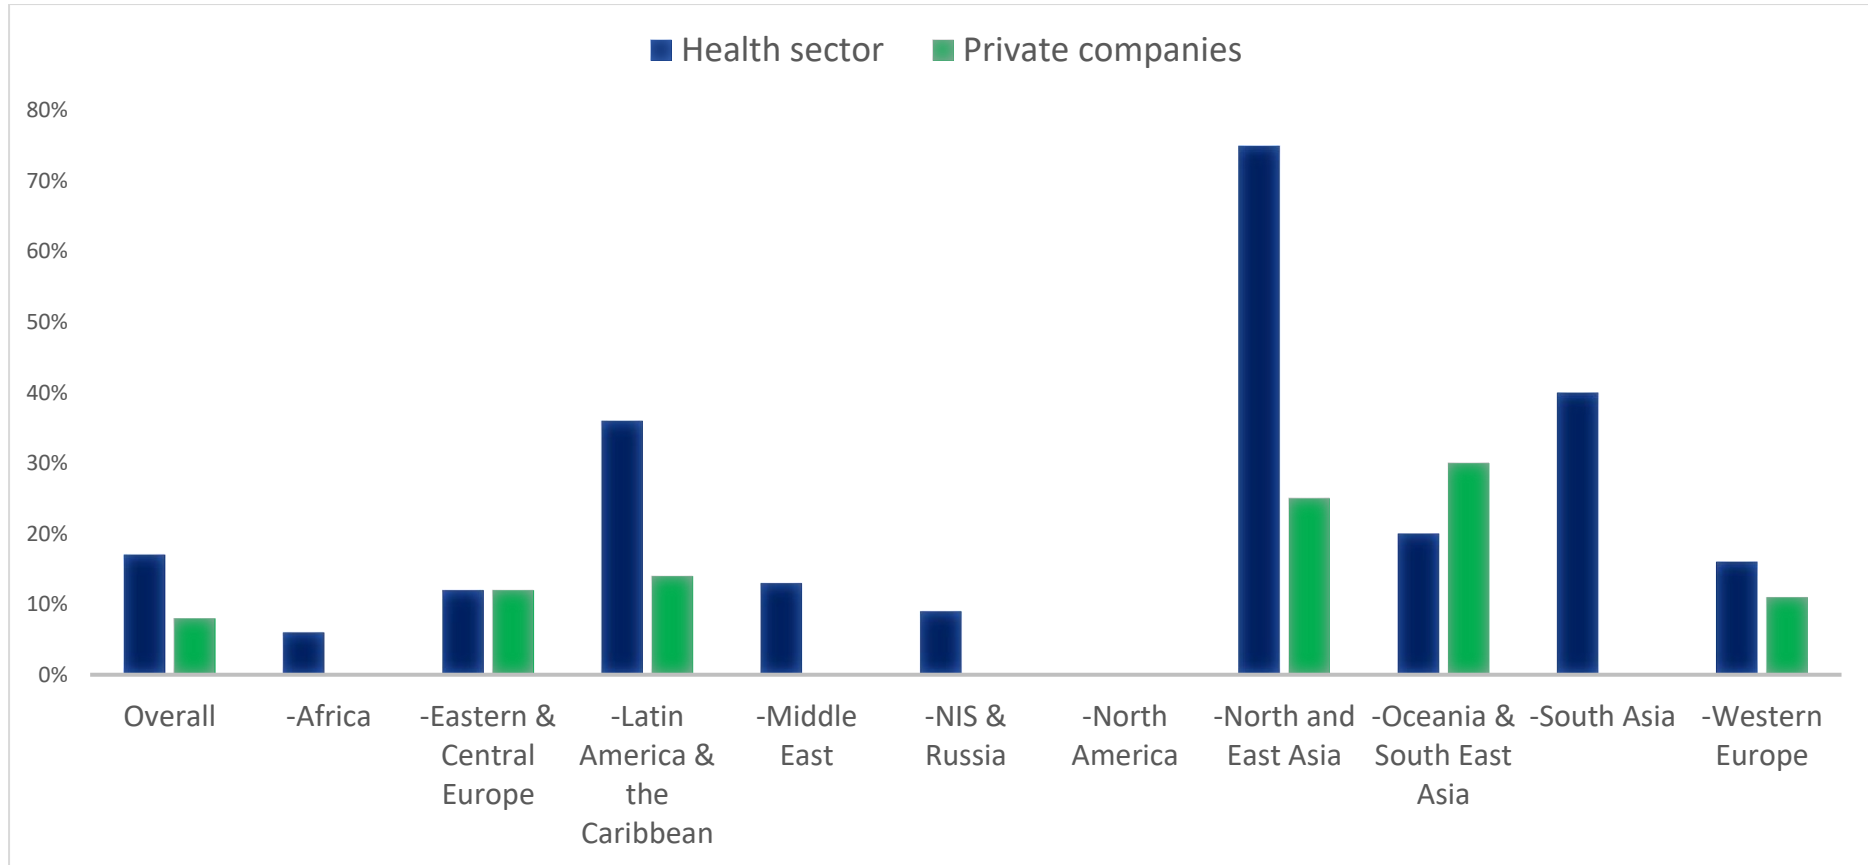

1  
2  
3  
4  
5  
6  
7  
8  
9  
10  
11  
12  
13  
14  
15  
16  
17  
18  
19  
20  
21  
22  
23  
24  
25  
26  
27  
28  
29  
30  
31  
32  
33  
34  
35  
36  
37  
38  
39  
40  
41  
42  
43  
44  
45  
46

# BMJ Open

## Global eHealth Capacity: Secondary Analysis of WHO data on eHealth and Implications for Kidney Care Delivery in Low Resource Settings.

|                                 |                                                                                                                                                                                                                                                                                                                                                                                                                                                                                                                                                                                                                                                                                                                                                                                                                                                                                                                                                                                                                                                                                                                                                                                                                                                                                                                                                                                                                                           |
|---------------------------------|-------------------------------------------------------------------------------------------------------------------------------------------------------------------------------------------------------------------------------------------------------------------------------------------------------------------------------------------------------------------------------------------------------------------------------------------------------------------------------------------------------------------------------------------------------------------------------------------------------------------------------------------------------------------------------------------------------------------------------------------------------------------------------------------------------------------------------------------------------------------------------------------------------------------------------------------------------------------------------------------------------------------------------------------------------------------------------------------------------------------------------------------------------------------------------------------------------------------------------------------------------------------------------------------------------------------------------------------------------------------------------------------------------------------------------------------|
| Journal:                        | <i>BMJ Open</i>                                                                                                                                                                                                                                                                                                                                                                                                                                                                                                                                                                                                                                                                                                                                                                                                                                                                                                                                                                                                                                                                                                                                                                                                                                                                                                                                                                                                                           |
| Manuscript ID                   | bmjopen-2021-055658.R2                                                                                                                                                                                                                                                                                                                                                                                                                                                                                                                                                                                                                                                                                                                                                                                                                                                                                                                                                                                                                                                                                                                                                                                                                                                                                                                                                                                                                    |
| Article Type:                   | Original research                                                                                                                                                                                                                                                                                                                                                                                                                                                                                                                                                                                                                                                                                                                                                                                                                                                                                                                                                                                                                                                                                                                                                                                                                                                                                                                                                                                                                         |
| Date Submitted by the Author:   | 23-Feb-2022                                                                                                                                                                                                                                                                                                                                                                                                                                                                                                                                                                                                                                                                                                                                                                                                                                                                                                                                                                                                                                                                                                                                                                                                                                                                                                                                                                                                                               |
| Complete List of Authors:       | Okpechi, Ikechi G ; University of Cape Town, Medicine<br>Muneer, Shezel; University of Alberta, Department of Medicine<br>Ye, Feng; University of Alberta, Department of Medicine<br>Zaidi, Deenaz; University of Alberta, Medicine<br>Ghimire, Anukul; University of Alberta, Department of Medicine<br>Tinwala, Mohammed; University of Alberta, Department of Medicine<br>Saad, Syed; University of Alberta, Department of Medicine<br>Osman, Mohamed; University of Alberta, Medicine<br>Lunyera, Joseph; Duke University School of Medicine, Medicine<br>Tonelli, Marcello; University of Calgary Cumming School of Medicine, Department of Medicine<br>Caskey, Fergus; University of Bristol Faculty of Medicine and Dentistry, Department of Medicine<br>George, Cindy; South African Medical Research Council, Non-Communicable Diseases Research Unit<br>Kengne , AP; Medical Research Council of South Africa, Non-Communicable Diseases Research Unit<br>Malik, Charu; International Society of Nephrology, Administration<br>Damster, Sandrine; International Society of Nephrology, Administration<br>Levin, Adeera; University of British Columbia, Division of Nephrology<br>Johnson, David; The University of Queensland Faculty of Medicine and Biomedical Sciences, Department of Medicine<br>Jha, Vivekanand; The George Institute for Global Health India, Department of Medicine<br>Bello, A; University of Alberta, |
| <b>Primary Subject Heading</b>: | Renal medicine                                                                                                                                                                                                                                                                                                                                                                                                                                                                                                                                                                                                                                                                                                                                                                                                                                                                                                                                                                                                                                                                                                                                                                                                                                                                                                                                                                                                                            |
| Secondary Subject Heading:      | Global health, Health informatics, Health services research                                                                                                                                                                                                                                                                                                                                                                                                                                                                                                                                                                                                                                                                                                                                                                                                                                                                                                                                                                                                                                                                                                                                                                                                                                                                                                                                                                               |
| Keywords:                       | COVID-19, Chronic renal failure < NEPHROLOGY, International health services < HEALTH SERVICES ADMINISTRATION & MANAGEMENT, Organisation of health services < HEALTH SERVICES ADMINISTRATION & MANAGEMENT                                                                                                                                                                                                                                                                                                                                                                                                                                                                                                                                                                                                                                                                                                                                                                                                                                                                                                                                                                                                                                                                                                                                                                                                                                  |
|                                 |                                                                                                                                                                                                                                                                                                                                                                                                                                                                                                                                                                                                                                                                                                                                                                                                                                                                                                                                                                                                                                                                                                                                                                                                                                                                                                                                                                                                                                           |

1  
2  
3  
4  
5  
6  
7  
8  
9  
10  
11  
12  
13  
14  
15  
16  
17  
18  
19  
20  
21  
22  
23  
24  
25  
26  
27  
28  
29  
30  
31  
32  
33  
34  
35  
36  
37  
38  
39  
40  
41  
42  
43  
44  
45  
46  
47  
48  
49  
50  
51  
52  
53  
54  
55  
56  
57  
58  
59  
60





I, the Submitting Author has the right to grant and does grant on behalf of all authors of the Work (as defined in the below author licence), an exclusive licence and/or a non-exclusive licence for contributions from authors who are: i) UK Crown employees; ii) where BMJ has agreed a CC-BY licence shall apply, and/or iii) in accordance with the terms applicable for US Federal Government officers or employees acting as part of their official duties; on a worldwide, perpetual, irrevocable, royalty-free basis to BMJ Publishing Group Ltd ("BMJ") its licensees and where the relevant Journal is co-owned by BMJ to the co-owners of the Journal, to publish the Work in this journal and any other BMJ products and to exploit all rights, as set out in our [licence](#).

The Submitting Author accepts and understands that any supply made under these terms is made by BMJ to the Submitting Author unless you are acting as an employee on behalf of your employer or a postgraduate student of an affiliated institution which is paying any applicable article publishing charge ("APC") for Open Access articles. Where the Submitting Author wishes to make the Work available on an Open Access basis (and intends to pay the relevant APC), the terms of reuse of such Open Access shall be governed by a Creative Commons licence – details of these licences and which [Creative Commons](#) licence will apply to this Work are set out in our licence referred to above.

Other than as permitted in any relevant BMJ Author's Self Archiving Policies, I confirm this Work has not been accepted for publication elsewhere, is not being considered for publication elsewhere and does not duplicate material already published. I confirm all authors consent to publication of this Work and authorise the granting of this licence.

**Title:** Global eHealth Capacity: Secondary Analysis of WHO data on eHealth and Implications for Kidney Care Delivery in Low Resource Settings.

**Authors:** Ikechi G. Okpechi,<sup>1</sup> Shezel Muneer,<sup>1</sup> Feng Ye,<sup>1</sup> Deenaz Zaidi,<sup>1</sup> Anukul Ghimire,<sup>1</sup> Mohammed Tinwala,<sup>1</sup> Syed Saad,<sup>1</sup> Mohamed Osman,<sup>1</sup> Joseph Lunyera,<sup>2</sup> Marcello Tonelli,<sup>3</sup> Fergus Caskey,<sup>4</sup> Cindy George,<sup>5</sup> Andre P. Kengne,<sup>5</sup> Charu Malik,<sup>6</sup> Sandrine Damster,<sup>6</sup> Adeera Levin,<sup>7</sup> David W. Johnson,<sup>8,9,10</sup> Vivekanand Jha,<sup>11,12,13</sup> Aminu K. Bello<sup>1</sup>

**Affiliations:**

<sup>1</sup> Division of Nephrology, Department of Medicine, University of Alberta, Edmonton, Canada

<sup>2</sup> Division of General Internal Medicine, Department of Medicine, Duke University School of Medicine, Durham, North Carolina

<sup>3</sup> Department of Medicine, University of Calgary, Calgary, Alberta, Canada

<sup>4</sup> Department of Medicine, Population Health Sciences, Bristol Medical School, University of Bristol, Bristol, UK

<sup>5</sup> Non-communicable Diseases Research Unit, South African Medical Research Council (SAMRC), Tygerberg, South Africa

<sup>6</sup> International Society of Nephrology, Brussels, Belgium

<sup>7</sup> Division of Nephrology, Department of Medicine, University of British Columbia, Vancouver, British Columbia, Canada

<sup>8</sup> Department of Nephrology, Metro South and Integrated Nephrology and Transplant Services (MINTS), Princess Alexandra Hospital, Brisbane, Queensland, Australia

<sup>9</sup> Centre for Kidney Disease Research, University of Queensland at Princess Alexandra Hospital, Brisbane, Queensland, Australia

<sup>10</sup> Translational Research Institute, Brisbane, Queensland, Australia

<sup>11</sup> George Institute for Global Health, University of New South Wales (UNSW), New Delhi, India

<sup>12</sup> School of Public Health, Imperial College, London, UK

<sup>13</sup> Manipal Academy of Higher Education, Manipal, India

**Address for Correspondence and Reprints****Name:** Aminu K. Bello**Address:** Division of Nephrology and Immunology, Department of Medicine, University of Alberta, Edmonton, Alberta, Canada**Email:** [aminu1@ualberta.ca](mailto:aminu1@ualberta.ca)**Abstract word count (311)****Manuscript word count (4,059)****Keywords:** chronic kidney disease, eHealth, electronic health records, mHealth, telehealth, workforce

For peer review only



## Abstract

**Objective:** To describe the use of electronic health (eHealth) in support of health coverage for kidney care across International Society of Nephrology (ISN) regions.

**Design:** Secondary analysis of World Health Organization (WHO) survey on eHealth as well as use of data from the World Bank, and Internet World Stats on global eHealth services.

**Setting:** A web-based survey on the use of eHealth in support of universal health coverage

**Participants:** 125 WHO Member States provided response.

**Primary outcome measures:** The availability of eHealth services (e.g., electronic health records, telehealth, etc) and governance frameworks (policies) for kidney care across ISN regions.

**Results:** The survey conducted by the WHO received responses from 125 (64.4%) Member States representing 4.4 billion people globally. The number of mobile cellular subscriptions were < 100% of the population in Africa, South Asia, North America, and North-East Asia; percentage of internet users increased from 2015 to 2020 in all regions. Western Europe had the highest percentage of internet users in all the periods: 2015 (82.0%), 2019 (90.7%), and 2020 (93.9%); Africa had the least: 9.8%, 21.8% and 31.4%, respectively. The North-East Asia region had the highest availability of national electronic health record system (75%) and eLearning access in medical schools (100%) with the lowest in Africa (27% and 39%, respectively). Policies concerning governance aspects of eHealth (e.g. privacy, liability, data sharing) were more widely available in high-income countries (55% to 93%) than in low-income countries (0% to 47%) while access to mHealth for treatment adherence was more available in low-income countries (21%) than in high-income countries (7%).

**Conclusion:** The penetration of eHealth services across ISN regions is suboptimal, particularly in low-income countries. Increasing utilization of internet communication technologies provides an opportunity to improve access to kidney education and care globally, especially in low-income countries.

### Strengths and Limitations of this study:

- This is the first study assessing the availability and use of eHealth services across International Society of Nephrology (ISN) regions using global data on eHealth availability and use.
- Data were collected by the World Health Organization (WHO) through a web-based survey to evaluate the availability of eHealth across eight themes: eHealth foundations, mobile health (mHealth), telehealth, eLearning, electronic health records, legal frameworks for eHealth, social media, and big data.
- Lack of policy and governance strategies relevant to eHealth (e.g., privacy, liability, data sharing / ownership), as well as poor utilization of eHealth for learning and health information systems remains a major hurdle to achieving universal health coverage, especially in low- and lower-middle income countries.
- The findings of this study can be used to improve workforce shortages for learning, training, and delivery of kidney care, especially in low resource settings.
- A limitation of this work may relate to the non-participation in the survey used for our study of a few countries with large populations in their regions.

only

## Introduction:

Approximately 97% of people worldwide live within reach of a mobile cellular signal.<sup>1</sup> The widespread availability of this service can be a platform for increased utilization of registries, electronic health records and diseases surveillance systems to empower monitoring and reporting of disease incidence and prevalence,<sup>2</sup> patient outcomes,<sup>3</sup> and quality and safety of delivered care<sup>3,4</sup> as well as to allow comparison between and within health services.<sup>5-7</sup> Electronic health (eHealth) is the cost-effective and secure use of information and communications technologies (ICT) in support of health and health-related fields, including health-care services, health surveillance, health literature, and health education, knowledge and research.<sup>8</sup> According to the World Health Organization (WHO), 87% of Member States have one or more national mHealth initiatives, 58% have an effective strategy for eHealth, 55% have legislation to protect electronic patient data.<sup>8</sup>

In the current era of the COVID-19 global pandemic, the potential for using eHealth to transform kidney disease management is increasingly recognized.<sup>9,10</sup> A cross-sectional survey conducted by the International Society of Nephrology (ISN) Global Kidney Health Atlas (GKHA) in 2017 reported low utilization of health information systems in the care of patients with kidney failure, especially in low-income countries (LICs) and lower-middle-income countries (LMICs).<sup>11</sup> However, the survey was limited by a focus on registries.<sup>11</sup> Furthermore, a systematic review of 43 studies that included 6,617 participants and evaluated the impact of an eHealth intervention in people with chronic kidney disease (CKD) did not find statistically significant improvements in the health domains assessed with eHealth in patients with CKD although eHealth was suggested to be useful for dietary sodium intake and fluid management.<sup>12</sup> However, other studies have shown that some forms of eHealth (e.g., telenephrology) are useful for improving access to kidney care in primary care settings,<sup>13</sup> for

1  
2  
3 self-management for patients with CKD,<sup>14</sup> for nurse practitioner and nephrologist training  
4 and education,<sup>15,16</sup> and for safe, economical and efficient care delivery in rural and remote  
5 areas.<sup>17</sup> The aim of this study is to secondarily analyse available WHO data on eHealth across  
6 eight themes (eHealth foundations, mobile health (mHealth), telehealth, eLearning, electronic  
7 health records, legal frameworks for eHealth, social media, and big data) for universal health  
8 coverage<sup>18</sup> and appraise the implications of our findings for kidney care across ISN regions.  
9  
10  
11  
12  
13  
14  
15  
16  
17  
18

## 19 **Methods**

20  
21 This study is a secondary analysis of data from the WHO third global survey on eHealth.<sup>18</sup>  
22  
23 The study, which was designed using a survey method is summarized as follows. The cross-  
24 sectional survey was developed and conducted by the WHO through the Global Observatory  
25 for eHealth (GOe) with input and consultation from experts in eHealth. The survey assessed  
26 eight themes in eHealth including: (i) eHealth foundations, (ii) mobile health (mHealth), (iii)  
27 telehealth, (iv) eLearning, (v) electronic health records (EHR), (vi) legal frameworks for  
28 eHealth, (vii) social media and (viii) big data. Concise definitions of these themes are  
29 provided:  
30  
31  
32  
33  
34  
35  
36  
37  
38  
39

- 40 – **eHealth:**<sup>19</sup> the cost-effective and secure use of ICT in support of health and health  
41 related fields, including health-care services, health surveillance, health literature, and  
42 health education, knowledge and research.  
43  
44
- 45 – **mHealth:**<sup>18</sup> the use of mobile devices, such as mobile phones, patient monitoring  
46 devices, Personal Digital Assistants, and wireless devices, for medical and public  
47 health practice including free telephone hotlines for emergencies provided by trained  
48 personnel and pre-recorded messages (toll-free emergency telephone services),  
49 reminder messages provided by health services to patients aimed at achieving  
50  
51  
52  
53  
54  
55  
56  
57  
58  
59  
60

1  
2  
3 medication adherence, reminder messages to patients to make or attend an  
4  
5 appointment, etc..  
6

- 7  
8 – **Telehealth:**<sup>18</sup> the delivery of health care services through ICT for the exchange of  
9  
10 information in real time (synchronously, e.g., by telephone or video link) or by store-  
11  
12 and-forward methods (asynchronously, e.g., by email) for the diagnosis and treatment  
13  
14 of diseases and injuries, research and evaluation, and for the continuing education of  
15  
16 health professionals where patients and care providers are separated by distance.  
17  
18 – **eLearning:**<sup>20</sup> the use of ICT for education  
19  
20  
21 – **Electronic Health Records (EHR):**<sup>18</sup> real-time, patient-centred records that provide  
22  
23 immediate and secure information to authorized users and typically contain a patient's  
24  
25 medical history, diagnoses and treatment, medications, allergies, immunizations, as  
26  
27 well as radiology images and laboratory results.  
28  
29 – **Legal framework for eHealth:**<sup>18</sup> the legislative process addressing transfer and use  
30  
31 of information between health care workers and patients that is relevant to issues of  
32  
33 privacy and confidentiality of patient data, access rights and sharing rights for data,  
34  
35 addressing data quality and integrity as a basis for clinical and patient decision-  
36  
37 making and rules governing the adaptation of professional liability to accommodate  
38  
39 care provided remotely or virtually.  
40  
41 – **Social Media:**<sup>18</sup> interactive platforms for individuals, communities and organizations  
42  
43 to share and discuss content, debate issues and promote new ideas e.g. Facebook,  
44  
45 Twitter or YouTube.  
46  
47 – **Big data:**<sup>18</sup> refers to extremely large data sets that encompass a range of data  
48  
49 including clinical data from electronic health records; the phenotype; genomic  
50  
51 information; and data on other determinants of health such as environment and  
52  
53 lifestyle.  
54  
55  
56  
57  
58  
59  
60

1  
2  
3  
4  
5  
6 The survey was developed in English and translated into seven languages (Arabic,  
7 Chinese, English, French, Russian, Spanish and Portuguese) to improve country responses  
8 and accuracy of responses. A web-based tool, (LimeSurvey -  
9  
10 <https://www.limesurvey.org/en/>), was used for online form creation, data collection and  
11 management. WHO regional offices staff assisted in coordinating the survey process and  
12 liaising with the GOe Secretariat in Geneva. National level survey coordinators, together with  
13 relevant ministries and academic and research institutions identified between 5 and 10  
14 national expert informant groups in eHealth to participate in the survey. The group consisted  
15 of eHealth specialists, professionals in telehealth, EHRs, mHealth and statisticians  
16 responsible for national health data. Expert informants met for one day to reach consensus on  
17 a single national-level response. Hence, each participating country submitted a single national  
18 survey with input from its group of expert informants. The survey was conducted between 1  
19 April and 30 June 2015. Data on ICT indices (a composite index of fixed-telephone  
20 subscriptions, mobile-cellular telephone subscriptions, international Internet bandwidth per  
21 Internet user, households with a computer, and households with Internet access; scored as  
22 low as 0 to as high as 100 and presented in unit scores) were obtained from the World Bank<sup>21</sup>  
23 while more recent (2019 and 2020) data on internet usage were obtained from Internet World  
24 Stats (<https://www.internetworldstats.com/>).

### 49 **Data handling and processing**

50  
51 The results of the survey were reported according to the Checklist for Reporting  
52 Results of Internet E-Surveys (CHERRIES) statement<sup>22</sup> (Supplementary Appendix). After  
53 receiving the completed questionnaires, all non-English responses were translated into  
54 English and survey responses were checked for consistency. Data were then analyzed by  
55  
56  
57  
58  
59  
60

1  
2  
3 thematic sections using computed percentages for each “yes” response to obtain the overall  
4 results for all responding countries and regions. We regrouped country responses using the  
5 ten ISN regional classification: Africa, East and Central Europe, Latin America, Middle East,  
6 Newly Independent States (NIS) and Russia, North America and Caribbean, North and East  
7 Asia, Oceania and South East Asia (OSEA), South Asia and Western Europe  
8 (<https://www.theisn.org/about-isn/governance/regional-boards/>). Country responses were also  
9 grouped according to World Bank income groups. Data on mobile-cellular subscriptions and  
10 internet users in each region were provided as the median percentage of the total population  
11 of participating regions. No statistical comparisons were used for describing the data which  
12 were presented in percentages.  
13  
14  
15  
16  
17  
18  
19  
20  
21  
22  
23  
24  
25  
26  
27

### 28 **Patient and public involvement:**

29  
30 Patients or the public were not involved in the design, or conduct, or reporting, or  
31 dissemination plans of our research.  
32  
33  
34  
35  
36

## 37 **Results**

### 38 ***(i) Participating country indices***

39  
40 A response to the survey was received from 125 WHO Member States out of 194  
41 Member States that were surveyed, representing a response rate of 64.4% and a total  
42 population of 4.39 billion people. The list of participating countries based on ISN regional  
43 groups is presented in Supplementary Table S1 and a summary of the demographic,  
44 economic and health metrics for each region is shown in Table 1. Overall, the median ICT  
45 development index for participating countries was 4.8 (95% CI: 2.9-6.9). Four regions: Africa  
46 (2.3), South Asia (2.3), OSEA (4.0) and Latin America (4.4) had lower indices compared to  
47 the median value while Western Europe had the highest (7.9). Subscriptions to mobile-  
48  
49  
50  
51  
52  
53  
54  
55  
56  
57  
58  
59  
60

cellular networks was highest in the Latin America region (124.6% [95% CI: 89.9 – 142.7]) and lowest in South Asia (71.3% [95% CI: 63.7 – 120.6]) while percentage of the population that used the internet was highest in Western Europe (82.0% [95% CI: 70.0 – 93.0]) and lowest in Africa (9.8% [95% CI: 3.0 – 18.1]) (Figure 1). However, internet users increased across all regions in 2019 and 2020, including Africa (21.8% and 31.4%, respectively) and South Asia (34% and 46%, respectively) (Figure 1).

### ***(ii) National eHealth policies, funding and capacity building***

A national policy for eHealth was available in all participating countries in North America (100%) and North East Asia (100%) and was lowest in participating countries from Africa (42%) and East and Central European countries (47%) (Figure S1). Availability of policies governing health information systems in countries across regions also varied across regions. Overall, participating countries reported multiple sources of funding for eHealth including public (77%), donor (non-public) (63%), private (commercial) (40%) and public-private partnerships (42%) and LICs and LMICs relied more on donor funding for eHealth services (Figure S2). Overall, pre-service, and in-service training in eHealth were available in 74% and 77%, respectively. Pre-service training was lowest in Africa (55%) and highest in NIS and Russia (100%) and North America (100%). In-service training was lowest in Africa (58%) and highest in North and East Asia (100%) (Figure S3).

### ***(iii) mHealth***

Data on access to mHealth across 3 of the 6 domains reported (toll-free emergency, appointment reminders and treatment adherence) are provided in Supplementary Table S2. International toll-free emergency access to mHealth was available in only 2 regions: OSEA (10%) and Western Europe (11%) and was unavailable in all regions for appointment



1  
2  
3 reminders. National toll-free emergency access to mHealth services was variably available in  
4  
5 all regions. Access to National mHealth services for treatment adherence was mostly  
6  
7 available in low-income countries (21%) and was lowest in high-income countries (HICs)  
8  
9 (7%).  
10  
11  
12  
13

#### 14 15 **(iv) Telehealth**

16  
17 Teledermatology, telepathology, teleradiology and telepsychiatry were reported but  
18  
19 telenephrology programs were not reported. Nonetheless, services to remote patient  
20  
21 monitoring were mostly available in HICs (40%) and at the local / peripheral health care  
22  
23 system level with the program fully established only in 26% of countries (Table 2).  
24  
25  
26  
27

#### 28 29 **(v) eLearning**

30  
31 The availability of eLearning for health sciences students (pre-service) and health  
32  
33 professionals (in-service) in Medicine (Medical School), nursing and midwifery and  
34  
35 pharmacy are reported in Figure S4. Use of eLearning in Medical school was highest in North  
36  
37 East Asia (100%) and lowest in South Asia (40%) and Africa (39%). North East Asia also  
38  
39 had the highest use of eLearning services for pre-service training of nurses and midwives  
40  
41 (75%) and pharmacists (100%). Use of eLearning for pharmacists training was unavailable in  
42  
43 South Asia (Figure S4).  
44  
45  
46  
47  
48

#### 49 50 **(vi) Electronic health records (EHR) systems**

51  
52 National EHR systems were mostly available in North East Asia (75%) while  
53  
54 countries in Africa had the least availability of EHR systems (27%) (Figure 2A). Overall,  
55  
56 secondary healthcare facilities were more likely to have EHR systems (42%) than primary  
57  
58 healthcare (41%) or tertiary healthcare facilities (39%) (Figure S5). Secondary and tertiary  
59  
60

1  
2  
3 facilities in the NIS and Russia region had the highest availability of EHR systems (73% and  
4  
5 64%, respectively) while all tiers of healthcare facilities in Africa had the lowest (Figure S5).  
6  
7 Availability of laboratory information systems, pathology information systems, picture  
8  
9 archiving and communication system (PACS) and pharmacy information systems by income  
10  
11 groups are shown in Figures 2B-2E with most regions reporting low availability of these  
12  
13 systems for healthcare. Human resource availability for health information systems was  
14  
15 similar across income groups but was highest in the Oceania and the South East Asia region  
16  
17 (80%) (Figure S6).  
18  
19  
20  
21  
22  
23

#### 24 ***(vii) Legal frameworks for eHealth***

25  
26 Aspects of the legal framework governing use of eHealth were not readily available  
27  
28 across countries and regions (Figure S7). For instance, countries from the South Asia region,  
29  
30 did not have frameworks governing liability or reimbursement for eHealth, patient safety and  
31  
32 quality of care based on data quality, protection of the privacy of individuals, sharing of  
33  
34 digital data between health professionals and sharing of personal health data between  
35  
36 research entities (Figure S7).  
37  
38  
39  
40  
41  
42

#### 43 ***(viii) Social media***

44  
45 National policy on use of social media by government organizations was lacking and  
46  
47 ranged from as low as 9% in the NIS and Russia region to 50% in the North East Asia region.  
48  
49 However, specific policy on the use of social media in the health domain was unavailable in  
50  
51 six regions (Eastern and Central Europe, Latin America, Middle East, NIS & Russia, North  
52  
53 America and South Asia). When utilized, social media were mostly used for making  
54  
55 emergency announcements, general health announcements and for health promotion  
56  
57 campaigns (Figure S8).  
58  
59  
60

### **(ix) Big data**

Information on policy or strategies that govern use of big data in the health sector and private companies was sparsely reported. North East Asia had the highest proportion of policies in the health sector (75%) whilst Africa had the least (6%). No data was obtained for North America. (Figure S9).

### **Discussion**

The United Nations Sustainable Development Goals emphasizes the great potential of the spread of information and communications technology and global interconnectedness to accelerate human progress, and to bridge the digital divide to develop knowledge in societies.<sup>23</sup> The ISN-GKHA has identified large and varied gaps in resources and workforce required for adequate provision of kidney care across several countries, particularly in LICs and LMICs in all the ISN regions. eHealth services may be potential vehicle to harness local resources for improvements in kidney care. This study, which mainly analyzed WHO eHealth survey data using the ISN regional groups, found low ICT development indices mostly in LIC and LMICs, low availability of national EHR and proportion of national eHealth policies in LICs and LMICs, increased utilization of mHealth services in low-income settings, lack of use of eLearning across regions and absence of legal frameworks governing use of eHealth in several ISN regions. These findings underscore the need for concerted action if eHealth is to achieve its potential for reducing inequities in kidney care across regions and countries.

A major challenge in accessing kidney care in many countries is the lack of skilled workforce, specifically the absence of an adequate number of nephrologists.<sup>24</sup> The nephrologist density in HICs in North America and Western Europe is more than 90 times

1  
2  
3 that in low-income countries in Africa, South Asia and Oceania region (28.52 per million  
4 population [pmp] vs. 0.31 pmp),<sup>25</sup> suggesting a clear disadvantage in care access for  
5  
6 populations with low nephrologist densities.<sup>26</sup> In a global survey Lunney et al identified  
7  
8 geography and low nephrology workforce to be associated with lack of access to kidney care,  
9  
10 especially in low-income countries.<sup>27</sup> Low nephrology workforce, particularly in rural or  
11  
12 remote areas often means long travel distance to access care<sup>28</sup> with potentially negative  
13  
14 consequences, including increased cost of care, low quality of life,<sup>29</sup> lack of access to kidney  
15  
16 replacement therapies (KRT; i.e. dialysis and transplantation)<sup>29-31</sup> and increased likelihood of  
17  
18 death.<sup>32</sup> In a large South African Province with only 2 public service nephrologists, a study  
19  
20 that assessed the predictors of mortality in rural dwelling patients receiving KRT at a district  
21  
22 hospital, found mortality to be higher in PD patients (P<0.001) who travelled farther to reach  
23  
24 the hospital than those treated with HD.<sup>30</sup> These challenges are not limited to low resource  
25  
26 countries. One study from Australia estimated that use of telehealth services for evaluating  
27  
28 post-transplant patients resulted in a net saving of 203,202 kilometres in patient travel  
29  
30 distance; 2771 hours in car travel time; about AUD \$31,048 in petrol savings and 51 tonnes  
31  
32 CO<sub>2</sub> equivalents of greenhouse gas emissions.<sup>28</sup> Due to the widespread availability of mobile  
33  
34 cellular signals,<sup>1</sup> cellular and internet technologies have potential to improve access to  
35  
36 nephrology care in remote and/or underserved settings. Access to care can also be improved  
37  
38 in children with kidney diseases given the significant shortage of paediatric nephrologists<sup>33</sup>  
39  
40 and mitigate high mortality identified in children with kidney failure in regions such as  
41  
42 Africa.<sup>34</sup> The global COVID-19 pandemic demonstrates that use of eHealth technologies will  
43  
44 likely increase over the coming years,<sup>35,36</sup> thereby highlighting the need to strengthen  
45  
46 governance on how eHealth systems are utilized across ISN regions. Care of patients with  
47  
48 CKD has been grossly affected during the pandemic, and it falls upon the stakeholder  
49  
50 community to develop sustainable solutions.  
51  
52  
53  
54  
55  
56  
57  
58  
59  
60

1  
2  
3  
4  
5  
6  
7  
8  
9  
10  
11  
12  
13  
14  
15  
16  
17  
18  
19  
20  
21  
22  
23  
24  
25  
26  
27  
28  
29  
30  
31  
32  
33  
34  
35  
36  
37  
38  
39  
40  
41  
42  
43  
44  
45  
46  
47  
48  
49  
50  
51  
52  
53  
54  
55  
56  
57  
58  
59  
60

The prevalence of CKD risk factors such as hypertension and diabetes mellitus continue to increase globally. The rise is projected to be significant, especially in LICs and LMICs of South and South East Asia and Africa.<sup>37,38</sup> For instance, globally, 79% of people with diabetes live in LICs or LMICs (mostly Oceania, South and South East Asia region) and projections of diabetes prevalence by 2045 suggest an increase of 143% in Africa, 96% in the Middle East and 74% in South East Asia compared with 15% and 33% increase in Europe and North America, respectively.<sup>37</sup> Innovative models of care delivery are therefore needed to manage the growing disease burden. Given the wide coverage of mobile phone networks, mHealth holds promise as an important delivery tool for health care delivery in resource constrained regions (Figure 1). mHealth interventions are in use for diagnosis and management of various infectious diseases including malaria,<sup>39</sup> tuberculosis,<sup>40</sup> and HIV<sup>41</sup> and for improving maternal and foetal health<sup>42</sup> in several developing countries. Although mHealth interventions are increasingly used for non-communicable diseases,<sup>43-45</sup> some studies highlight only a modest impact in NCD control likely due to limited number of studies and impact on process of care alone.<sup>46,47</sup> Our analysis showed that use of mHealth (appointment reminders and treatment adherence) and telehealth services (remote patient monitoring) were much higher in LICs and LMICs than in HICs (Supplementary Table S2 and Table 2). In a study conducted in a rural Indonesian population multifaceted mobile technology-supported primary health care intervention was associated with greater use of preventive CVD medication and lower BP levels among high-risk individuals.<sup>48</sup> These findings suggest that despite the relatively low current use, mHealth may be potentially useful for supporting case-finding for CKD,<sup>49</sup> CKD-specific education to improve awareness, integrated care delivery and efficient referral pathways, and perhaps allow quality control through real-time monitoring.<sup>50</sup>

1  
2  
3  
4  
5  
6 To guide implementation, ethical issues including type and quality of digital  
7  
8 technology, doctor-patient relationship, data confidentiality and security, informed consent  
9  
10 and patients and families satisfaction with telemedicine services should be considered in  
11  
12 framing legal governance for eHealth.<sup>51</sup> Increasing the use of such technologies will require  
13  
14 demonstration of public benefits (e.g. cost saving),<sup>52</sup> while ensuring that there is no  
15  
16 discrimination or digital inequality (e.g. not tailored to only those with a smartphone or for  
17  
18 the disabled)<sup>53</sup> and to protect patient and data privacy.<sup>54</sup> As our study shows, the legal  
19  
20 frameworks that govern sharing of personal health data or digital data and protect the privacy  
21  
22 of individual health-related data were either low or absent in many regions. There is need to  
23  
24 address such legislation in all regions (Figure S7).  
25  
26  
27  
28  
29  
30

31  
32 Our study also identified EHR use to be low in LICs and LMICs with poor utilization  
33  
34 of eLearning for pre-and in-service training in the health sectors (Figure S5). Barriers that  
35  
36 impede adoption and/or implementation of EHR systems such as cost (including setting up,  
37  
38 maintenance and ongoing costs), technical concerns, technical support, resistance to changing  
39  
40 work habits, loss of income and loss of productivity will need to be identified in each setting  
41  
42 and addressed. As Kruse et al<sup>55</sup> have suggested, policy makers will need to consider  
43  
44 incentives that reduce the implementation cost of EHR, possibly aimed more directly at  
45  
46 organizations that are known to have lower adoption rates, such as small hospitals in rural  
47  
48 areas. However, this may be possible in HICs where such technologies are readily available,  
49  
50 whereas in LICs and LMICs, such incentives should be targeted towards secondary and  
51  
52 tertiary care centres that serve a wider population. Measures that ensure successful adoption  
53  
54 and implementation of EHR technology including systems usability, interoperability, and  
55  
56  
57  
58  
59  
60

1  
2  
3 adaptability need to be considered in terms of local context, individual end-users and  
4  
5  
6 advancing technology.<sup>56</sup>  
7  
8  
9

10  
11 The potential and value of eLearning in addressing workforce shortages<sup>20,57</sup> and the  
12  
13 educational needs of health professionals, especially in developing countries is well  
14  
15 recognized.<sup>58</sup> The ISN fellowship program recently included hybrid (online plus hands-on)  
16  
17 training as part of the strategy for improving training of nephrologists from low-resource  
18  
19 settings.<sup>24</sup> This can improve training in glomerular diseases (histopathology), assessment of  
20  
21 urine microscopic findings as well as various aspects of interventional nephrology including  
22  
23 dialysis catheter insertion and care. A number of groups have used virtual platforms to upskill  
24  
25 healthcare workers in the care of patients with COVID-19 in India and Africa.<sup>59</sup> Access to the  
26  
27 basic IT infrastructure (e.g. computers and internet) remains a major hurdle to the  
28  
29 implementation of technology-enhanced teaching in developing countries.<sup>58</sup> Any solution  
30  
31 should be sensitive to local resources and be designed to operate at low cost (data, device).  
32  
33 One study that assessed the awareness, attitudes, preferences, and challenges to eLearning  
34  
35 among medical and nursing students at Makerere University, Uganda identified low monthly  
36  
37 income, quality of internet connectivity and lack of computer ownership among factors that  
38  
39 significantly affected attitudes towards eLearning.<sup>60</sup> Perceived advantages of online learning  
40  
41 by medical students in the UK included time and money saved from lack of travel and  
42  
43 flexibility and ability to learn at one's own pace whereas family distractions, internet  
44  
45 connection and the timing of tutorials were identified as barriers.<sup>61</sup> The extent of integration  
46  
47 of eLearning in health sciences (Medicine, Nursing and midwifery and Pharmacy) for both  
48  
49 pre- and in-service training was low in most regions in our study (Figure S4). The impact of  
50  
51 an improved integration of eLearning in health sciences will be widespread across all medical  
52  
53 disciplines.  
54  
55  
56  
57  
58  
59  
60

1  
2  
3  
4  
5  
6  
7  
8  
9  
10  
11  
12  
13  
14  
15  
16  
17  
18  
19  
20  
21  
22  
23  
24  
25  
26  
27  
28  
29  
30  
31  
32  
33  
34  
35  
36  
37  
38  
39  
40  
41  
42  
43  
44  
45  
46  
47  
48  
49  
50  
51  
52  
53  
54  
55  
56  
57  
58  
59  
60

There were a few limitations to this study previously described in the WHO report.<sup>18</sup> These include that the report is old (2015), given that there are no other reports superseding this with a global reach. However, our study has made up for this by the inclusion of newer data from elsewhere showing availability and use of telecommunications services as a proxy for use of eHealth that rely on such services. Also, WHO Member States were limited to one response per country i.e., expert informants were required to propose a consensus response for each question which was difficult in cases where the situation varied widely within the country. Furthermore, although every effort was made to select the best national experts to complete the instrument; the knowledge capacity of each focus group to accurately answer the questions was not determined. Another limitation of this study is the focus on large hospitals and private health institutions as all eHealth capacities and strategies (e.g., primary care level or general practitioner clinics) may not have been adequately captured, thus underestimating its use across countries. However, this data provides a broad scan of the availability of these services across participating countries and regions, therefore useful for monitoring progress and for improving services. Finally, some countries with large populations (e.g., France, Germany, Brazil, Egypt, Nigeria, and India) did not participate in the 2015 survey. This is likely to have affected some of the results of this survey e.g. proportion with access to the internet. Despite the limitations, this study is the first to present a comprehensive overview of the status and penetration of eHealth in ISN regions using data from the WHO global survey on eHealth. Our study has also been able to address identified gaps in availability of eHealth services and the implications of these for kidney care across ISN regions, particularly for LICs and LMICs.

## **Conclusion:**



1  
2  
3  
4  
5  
6  
7  
8  
9  
10  
11  
12  
13  
14  
15  
16  
17  
18  
19  
20  
21  
22  
23  
24  
25  
26  
27  
28  
29  
30  
31  
32  
33  
34  
35  
36  
37  
38  
39  
40  
41  
42  
43  
44  
45  
46  
47  
48  
49  
50  
51  
52  
53  
54  
55  
56  
57  
58  
59  
60

There is wide variation in the availability and accessibility of eHealth services across ISN regions with much reduced availability and access in LICs and LMICs. This is likely to have a significant negative impact for adequate kidney care provision in these regions, especially at a time when there are global restrictions in face-to-face contacts. Even though much infrastructure is required to set up such services, simple steps can be initiated towards broader use of eHealth services to aid care including legislations and provision of national guidelines / requirements on use of these technologies. Infrastructure development to improve access to the internet will need to be improved across regions especially in low-income countries. With rapidly evolving ICT technologies and as digitalization of medical education and care continues to gather pace in the future of healthcare, further research on the impact of eHealth in care of patients with kidney diseases is critical. The development of and access to appropriate technologies which facilitate equitable and high-quality care are needed to ensure no one is left behind.

1  
2  
3 **Contributors:** AKB conceptualized the research; SM, DZ and SS collated and checked the  
4 data for accuracy and completeness; FY analyzed the data; IGO designed the figures and  
5 Tables and wrote the first draft of the manuscript. IGO, SM, FY, DZ, AG, MoT, SS, MO, JL,  
6 MaT, FC, CG, APK, CM, SD, AL, DWJ, VJ, and AKB provided inputs for the interpretation  
7 of results and documentation of implications of the study findings in the discussion. IGO,  
8 SM, FY, DZ, AG, MoT, SS, MO, JL, MaT, FC, CG, APK, CM, SD, AL, DWJ, VJ, and AKB  
9 contributed to the preparation of the final version of the manuscript.  
10  
11  
12  
13  
14  
15  
16  
17  
18

19 **Funding:** No funding was received for this work.  
20

21 **Competing interests:** DWJ has received consultancy fees, research grants, speaker's  
22 honoraria and travel sponsorships from Baxter Healthcare and Fresenius Medical Care,  
23 consultancy fees from Astra Zeneca and AWAK, speaker's honoraria and travel sponsorships  
24 from ONO, and travel sponsorships from Amgen. He is a current recipient of an Australian  
25 National Health and Medical Research Council Leadership Investigator Grant. The remaining  
26 authors have no conflicts of interest to declare. VJ has received grants, speaker honoraria or  
27 consultancy fees from GlaxoSmithKline, Biocon, Baxter, Janssen, Medtronic, and  
28 NephroPlus. He has a policy of all funds being paid to his employer. AB has received  
29 consultancy fees from Janssen  
30  
31  
32  
33  
34  
35  
36  
37  
38  
39  
40  
41

42 **Patient consent for publication:** Not required  
43

44 **Ethics approval:** All data used in this study were already in the public domain and ethical  
45 approval was not required.  
46  
47  
48

49 **Data availability statement:** No additional data are available.  
50

51 **Acknowledgement:** We would like to thank Ms Sophanny Tiv (University of Alberta) for  
52 assisting us with some of the Figures and charts.  
53  
54  
55  
56  
57  
58  
59  
60

## References:

1. International Telecommunication Union (ITU). Measuring Digital Developments: Facts and Figures (2019). <https://itu.foleon.com/itu/measuring-digital-development/network-coverage/>. Accessed 18 December 2020.
2. Larsson S, Lawyer P, Garellick G, Lindahl B, Lundström M. Use of 13 disease registries in 5 countries demonstrates the potential to use outcome data to improve health care's value. *Health Aff (Millwood)*. 2012;31(1):220-227.
3. Hoque DME, Kumari V, Hoque M, Ruseckaite R, Romero L, Evans SM. Impact of clinical registries on quality of patient care and clinical outcomes: A systematic review. *PLoS One*. 2017;12(9):e0183667.
4. Han W, Sharman R, Heider A, Maloney N, Yang M, Singh R. Impact of electronic diabetes registry 'Meaningful Use' on quality of care and hospital utilization. *Journal of the American Medical Informatics Association : JAMIA*. 2016;23(2):242-247.
5. ERA-EDTA Registry. *ERA-EDTA Registry Annual Report 2017*. Amsterdam UMC, location AMC, Department of Medical Informatics, Amsterdam, the Netherlands, 2019.
6. USRDS. *United States Renal Data System. 2018 USRDS annual data report: Epidemiology of kidney disease in the United States*. National Institutes of Health, National Institute of Diabetes and Digestive and Kidney Diseases, Bethesda, MD, 2018. 2018.
7. Davids MR, Eastwood JB, Selwood NH, et al. A renal registry for Africa: first steps. *Clinical kidney journal*. 2016;9(1):162-167.
8. World Health Organization. eHealth at the WHO. <https://www.who.int/ehealth/about/en/>. Accessed 18 December 2020.
9. Singh T, Ngoh CL, Wong K, Khan BA. Impact of Telemedicine on Hospitalisation and Mortality Rates in Community-Based Haemodialysis Centres in Singapore during the COVID-19 Pandemic. *Ann Acad Med Singap*. 2020;49(10):756-763.
10. Wang CS, Ku E. eHealth in kidney care. *Nat Rev Nephrol*. 2020;16(7):368-370.
11. See EJ, Alrukhaimi M, Ashuntantang GE, et al. Global coverage of health information systems for kidney disease: availability, challenges, and opportunities for development. *Kidney Int Suppl (2011)*. 2018;8(2):74-81.
12. Stevenson JK, Campbell ZC, Webster AC, et al. eHealth interventions for people with chronic kidney disease. *The Cochrane database of systematic reviews*. 2019;8(8):Cd012379.
13. Zuniga C, Riquelme C, Muller H, Vergara G, Astorga C, Espinoza M. Using Telenephrology to Improve Access to Nephrologist and Global Kidney Management of CKD Primary Care Patients. *Kidney international reports*. 2020;5(6):920-923.
14. Shen H, van der Kleij R, van der Boog PJM, Chang X, Chavannes NH. Electronic Health Self-Management Interventions for Patients With Chronic Kidney Disease: Systematic Review of Quantitative and Qualitative Evidence. *Journal of medical Internet research*. 2019;21(11):e12384.
15. Osman MA, Okel J, Okpechi IG, Jindal K, Bello AK. Potential applications of telenephrology to enhance global kidney care. *BMJ Glob Health*. 2017;2(2):e000292.
16. Rutledge CM, Kott K, Schweickert PA, Poston R, Fowler C, Haney TS. Telehealth and eHealth in nurse practitioner training: current perspectives. *Adv Med Educ Pract*. 2017;8:399-409.
17. Venuthurupalli SK, Rolfe A, Fanning J, Cameron A, Hoy WE. Chronic Kidney Disease, Queensland (CKD.QLD) Registry: Management of CKD With Telenephrology. *Kidney international reports*. 2018;3(6):1336-1343.

18. World Health Organization. Global diffusion of eHealth: making universal health coverage achievable. Report of the third global survey on eHealth. Geneva: World Health Organization; 2016.  
[https://www.who.int/goe/publications/global\\_diffusion/en/](https://www.who.int/goe/publications/global_diffusion/en/). Accessed 19 December 2020.
19. World Health Organization. Resolution WHA58.33. Sustainable health financing, universal coverage and social health insurance. In: Fifty-eighth World Health Assembly, Geneva, 16–25 May 2005. Resolutions and decisions annex. Geneva: World Health Organization; 2005 [http://apps.who.int/gb/ebwha/pdf\\_files/WHA58-REC1/english/A58\\_2005\\_REC1-en.pdf](http://apps.who.int/gb/ebwha/pdf_files/WHA58-REC1/english/A58_2005_REC1-en.pdf). Accessed 18 December 2020.
20. Ruggeri K, Farrington C, Brayne C. A global model for effective use and evaluation of e-learning in health. *Telemedicine journal and e-health : the official journal of the American Telemedicine Association*. 2013;19(4):312-321.
21. World Bank. TCdata360: Country rank and value in the ITU ICT development index. [https://tcdata360.worldbank.org/indicators/h2e1ddd20?country=BRA&indicator=24719&viz=bar\\_chart&years=2015](https://tcdata360.worldbank.org/indicators/h2e1ddd20?country=BRA&indicator=24719&viz=bar_chart&years=2015). Accessed 18 December 2020.
22. Eysenbach G. Improving the quality of Web surveys: the Checklist for Reporting Results of Internet E-Surveys (CHERRIES). *Journal of medical Internet research*. 2004;6(3):e34.
23. United Nations. Transforming our world: the 2030 Agenda for Sustainable Development. <https://sdgs.un.org/2030agenda>. Accessed 16 October 2020.
24. Okpechi IG, Eddy AA, Jha V, Jacob T, Dupuis S, Harris DC. Impact of training nephrologists from developing nations and strategies for sustaining a training program in its fourth decade. *Kidney Int*. 2021;99(5):1073-1076.
25. Osman MA, Alrukhaimi M, Ashuntantang GE, et al. Global nephrology workforce: gaps and opportunities toward a sustainable kidney care system. *Kidney Int Suppl (2011)*. 2018;8(2):52-63.
26. Bello AK, Levin A, Lunney M, et al. Status of care for end stage kidney disease in countries and regions worldwide: international cross sectional survey. *Bmj*. 2019;367:l5873.
27. Lunney M, Alrukhaimi M, Ashuntantang GE, et al. Guidelines, policies, and barriers to kidney care: findings from a global survey. *Kidney Int Suppl (2011)*. 2018;8(2):30-40.
28. Andrew N, Barraclough KA, Long K, et al. Telehealth model of care for routine follow up of renal transplant recipients in a tertiary centre: A case study. *J Telemed Telecare*. 2020;26(4):232-238.
29. Gray NA, Dent H, McDonald SP. Renal replacement therapy in rural and urban Australia. *Nephrol Dial Transplant*. 2012;27(5):2069-2076.
30. Tamayo Isla RA, Ameh OI, Mapiye D, et al. Baseline Predictors of Mortality among Predominantly Rural-Dwelling End-Stage Renal Disease Patients on Chronic Dialysis Therapies in Limpopo, South Africa. *PLoS One*. 2016;11(6):e0156642.
31. Tonelli M, Hemmelgarn B, Kim AK, et al. Association between residence location and likelihood of kidney transplantation in Aboriginal patients treated with dialysis in Canada. *Kidney Int*. 2006;70(5):924-930.
32. Tonelli M, Hemmelgarn B, Culleton B, et al. Mortality of Canadians treated by peritoneal dialysis in remote locations. *Kidney Int*. 2007;72(8):1023-1028.
33. McCulloch M, Luyckx VA, Cullis B, et al. Challenges of access to kidney care for children in low-resource settings. *Nat Rev Nephrol*. 2020.

- 1
- 2
- 3
- 4 34. Ashuntantang G, Osafo C, Olowu WA, et al. Outcomes in adults and children with
- 5 end-stage kidney disease requiring dialysis in sub-Saharan Africa: a systematic
- 6 review. *The Lancet Global health*. 2017;5(4):e408-e417.
- 7 35. Fernandes L, FitzPatrick ME, Roycroft M. The role of the future physician: building
- 8 on shifting sands. *Clin Med (Lond)*. 2020;20(3):285-289.
- 9 36. Gasser U, Ienca M, Scheibner J, Sleight J, Vayena E. Digital tools against COVID-19:
- 10 taxonomy, ethical challenges, and navigation aid. *Lancet Digit Health*.
- 11 2020;2(8):e425-e434.
- 12 37. Cho NH, Shaw JE, Karuranga S, et al. IDF Diabetes Atlas: Global estimates of
- 13 diabetes prevalence for 2017 and projections for 2045. *Diabetes research and clinical*
- 14 *practice*. 2018;138:271-281.
- 15 38. Kearney PM, Whelton M, Reynolds K, Muntner P, Whelton PK, He J. Global burden
- 16 of hypertension: analysis of worldwide data. *Lancet (London, England)*.
- 17 2005;365(9455):217-223.
- 18 39. Larocca A, Moro Visconti R, Marconi M. Malaria diagnosis and mapping with m-
- 19 Health and geographic information systems (GIS): evidence from Uganda. *Malar J*.
- 20 2016;15(1):520.
- 21 40. Maraba N, Hoffmann CJ, Chihota VN, et al. Using mHealth to improve tuberculosis
- 22 case identification and treatment initiation in South Africa: Results from a pilot study.
- 23 *PLoS One*. 2018;13(7):e0199687.
- 24 41. Cooper V, Clatworthy J, Whetham J, Consortium E. mHealth Interventions To
- 25 Support Self-Management In HIV: A Systematic Review. *Open AIDS J*. 2017;11:119-
- 26 132.
- 27 42. Olajubu AO, Fajemilehin BR, Olajubu TO, Afolabi BS. Effectiveness of a mobile
- 28 health intervention on uptake of recommended postnatal care services in Nigeria.
- 29 *PLoS One*. 2020;15(9):e0238911.
- 30 43. Mao Y, Lin W, Wen J, Chen G. Impact and efficacy of mobile health intervention in
- 31 the management of diabetes and hypertension: a systematic review and meta-analysis.
- 32 *BMJ Open Diabetes Res Care*. 2020;8(1).
- 33 44. Lu X, Yang H, Xia X, et al. Interactive Mobile Health Intervention and Blood
- 34 Pressure Management in Adults. *Hypertension*. 2019;74(3):697-704.
- 35 45. Li R, Liang N, Bu F, Hesketh T. The Effectiveness of Self-Management of
- 36 Hypertension in Adults Using Mobile Health: Systematic Review and Meta-Analysis.
- 37 *JMIR Mhealth Uhealth*. 2020;8(3):e17776.
- 38 46. Stephani V, Opoku D, Quentin W. A systematic review of randomized controlled
- 39 trials of mHealth interventions against non-communicable diseases in developing
- 40 countries. *BMC public health*. 2016;16:572.
- 41 47. Beratarrechea A, Moyano D, Irazola V, Rubinstein A. mHealth Interventions to
- 42 Counter Noncommunicable Diseases in Developing Countries: Still an Uncertain
- 43 Promise. *Cardiol Clin*. 2017;35(1):13-30.
- 44 48. Patel A, Praveen D, Maharani A, et al. Association of Multifaceted Mobile
- 45 Technology-Enabled Primary Care Intervention With Cardiovascular Disease Risk
- 46 Management in Rural Indonesia. *JAMA Cardiol*. 2019;4(10):978-986.
- 47 49. Liyanage T, Ninomiya T, Jha V, et al. Worldwide access to treatment for end-stage
- 48 kidney disease: a systematic review. *The Lancet*. 2015;385(9981):1975-1982.
- 49 50. Jafar TH, Ramakrishnan C, John O, et al. Access to CKD Care in Rural Communities
- 50 of India: a qualitative study exploring the barriers and potential facilitators. *BMC*
- 51 *nephrology*. 2020;21(1):26.
- 52 51. Langarizadeh M, Moghbeli F, Aliabadi A. Application of Ethics for Providing
- 53 Telemedicine Services and Information Technology. *Med Arch*. 2017;71(5):351-355.
- 54
- 55
- 56
- 57
- 58
- 59
- 60

- 1  
2  
3  
4  
5  
6  
7  
8  
9  
10  
11  
12  
13  
14  
15  
16  
17  
18  
19  
20  
21  
22  
23  
24  
25  
26  
27  
28  
29  
30  
31  
32  
33  
34  
35  
36  
37  
38  
39  
40  
41  
42  
43  
44  
45  
46  
47  
48  
49  
50  
51  
52  
53  
54  
55  
56  
57  
58  
59  
60
52. Rinaldi G, Hijazi A, Haghparast-Bidgoli H. Cost and cost-effectiveness of mHealth interventions for the prevention and control of type 2 diabetes mellitus: A systematic review. *Diabetes research and clinical practice*. 2020;162:108084.
  53. Pew Research Center. Smartphone Ownership Is Growing Rapidly Around the World, but Not Always Equally. <https://www.pewresearch.org/global/2019/02/05/smartphone-ownership-is-growing-rapidly-around-the-world-but-not-always-equally/>. Accessed 23 December 2020.
  54. Filkins BL, Kim JY, Roberts B, et al. Privacy and security in the era of digital health: what should translational researchers know and do about it? *Am J Transl Res*. 2016;8(3):1560-1580.
  55. Kruse CS, Kristof C, Jones B, Mitchell E, Martinez A. Barriers to Electronic Health Record Adoption: a Systematic Literature Review. *Journal of medical systems*. 2016;40(12):252.
  56. Fennelly O, Cunningham C, Grogan L, et al. Successfully implementing a national electronic health record: a rapid umbrella review. *International journal of medical informatics*. 2020;144:104281.
  57. Safie N, Aljunid S. E-learning initiative capacity building for healthcare workforce of developing countries. *Journal of Computer Science*. 2013;9(5):583.
  58. Frenk J, Chen L, Bhutta ZA, et al. Health professionals for a new century: transforming education to strengthen health systems in an interdependent world. *Lancet (London, England)*. 2010;376(9756):1923-1958.
  59. Webster P. Virtual health care in the era of COVID-19. *Lancet (London, England)*. 2020;395(10231):1180-1181.
  60. Olum R, Atulinda L, Kigozi E, et al. Medical Education and E-Learning During COVID-19 Pandemic: Awareness, Attitudes, Preferences, and Barriers Among Undergraduate Medicine and Nursing Students at Makerere University, Uganda. *J Med Educ Curric Dev*. 2020;7:2382120520973212.
  61. Dost S, Hossain A, Shehab M, Abdelwahed A, Al-Nusair L. Perceptions of medical students towards online teaching during the COVID-19 pandemic: a national cross-sectional survey of 2721 UK medical students. *BMJ open*. 2020;10(11):e042378.

## FIGURE LEGENDS

**Figure 1:** Proportion of mobile-cellular users and internet access across ISN regions

**Figure 2(A – E):** (A) Availability of national EHR system, (B - E) Availability of other electronic health record systems (laboratory information systems, pathology information systems, PACS systems, and pharmacy information systems)  
Abbreviations: EHR – electronic health records, PACS - picture archiving and communication system)

### Supplementary Materials:

**Table S1:** List of participating countries by ISN regions

**Table S2:** mHealth for accessing services

**Figure S1:** National eHealth policies / strategies across ISN regions

**Figure S2:** Funding sources for eHealth by income groups

**Figure S3:** eHealth capacity building

**Figure S4:** Use of e-learning in health sciences across ISN regions

**Figure S5:** Health facilities with EHR in ISN regions

**Figure S6:** Availability of human resources for Health Information Systems

**Figure S7:** Legal framework for eHealth across income groups

**Figure S8:** Health care organizations use of social media across ISN regions

**Figure S9:** Policy / strategy governing the use of big data

**Table 1:** Features of participating countries ranked according to ISN regions and World Bank groups

|                                       | Total population of participating countries (millions)* | GNI per capita (PPP Int \$) * | Physician density (per 10,000 population) | Nurse & midwife density (per 10,000 population) | Hospital bed density (per 10,000 population) | Life expectancy at birth (years) | Total health expenditure (% GDP) | ICT Development Index** |
|---------------------------------------|---------------------------------------------------------|-------------------------------|-------------------------------------------|-------------------------------------------------|----------------------------------------------|----------------------------------|----------------------------------|-------------------------|
| <b>Overall (n=125)</b>                | 4,389.9                                                 | 18220 (18722)                 | 1.63 (0.31-3.24)                          | 2.53 (0.74-6.11)                                | 28 (13-49)                                   | 74 (66-78)                       | 6.7 (5.4-8.9)                    | 4.8 (2.9-6.9)           |
| <b>ISN regions:</b>                   |                                                         |                               |                                           |                                                 |                                              |                                  |                                  |                         |
| -Africa (n=33)                        | 600.7                                                   | 4873 (6190)                   | 0.11 (0.06-0.29)                          | 0.68 (0.42-0.91)                                | 13 (5-20)                                    | 60 (57-64)                       | 5.7 (4.4-7.1)                    | 2.3 (1.6-3.7)           |
| -Eastern & Central Europe (n=17)      | 197.2                                                   | 18943 (6815)                  | 2.39 (2.02-3.38)                          | 5.50 (4.16-6.27)                                | 54 (39-66)                                   | 75 (74-77)                       | 7.2 (5.9-8.0)                    | 6.4 (5.8-6.9)           |
| -Latin America & the Caribbean (n=14) | 330.6                                                   | 12952 (5452)                  | 1.48 (1.11-2.10)                          | 1.04 (0.62-1.51)                                | 14 (10-21)                                   | 77 (74-78)                       | 7.3 (6.4-8.8)                    | 4.4 (3.6-6.0)           |
| -Middle East (n=8)                    | 152.3                                                   | 38863 (40229)                 | 1.95 (0.91-2.88)                          | 2.72 (1.87-5.38)                                | 18 (14-18)                                   | 76 (74-78)                       | 5.1 (3.0-7.0)                    | 5.9 (4.7-6.8)           |
| -NIS & Russia (n=11)                  | 278.4                                                   | 11351 (7072)                  | 3.47 (2.53-3.93)                          | 7.11 (5.02-9.04)                                | 52 (40-87)                                   | 69 (69-72)                       | 6.1 (4.5-6.8)                    | 5.3 (5.2-6.4)           |
| -North America (n=4)                  | 359.4                                                   | 32815 (19823)                 | 1.63 (0.79-2.26)                          | 6.42 (2.33-9.55)                                | 28 (23-31)                                   | 77 (73-81)                       | 8.4 (5.7-14.0)                   | 6.6 (4.9-7.9)           |
| -North and East Asia (n=4)            | 1,548.2                                                 | 19430 (15835)                 | 2.57 (1.90-3.06)                          | 3.87 (2.64-7.80)                                | 95 (50-135)                                  | 73 (69-80)                       | 6.0 (5.6-10.3)                   | 4.8 (4.5-8.3)           |
| -Oceania & South East Asia (n=10)     | 276.2                                                   | 20210 (24142)                 | 1.17 (0.18-1.95)                          | 3.50 (1.11-6.00)                                | 23 (14-31)                                   | 74 (67-82)                       | 5.3 (4.0-9.4)                    | 4.0 (2.8-7.9)           |
| -South Asia (n=5)                     | 370.4                                                   | 5366 (3238)                   | 0.36 (0.27-0.83)                          | 0.57 (0.50-0.98)                                | 6 (4-18)                                     | 68 (66-71)                       | 3.7 (3.6-8.1)                    | 2.3 (2.2-3.1)           |
| -Western Europe (n=19)                | 276.6                                                   | 40262 (11395)                 | 3.49 (3.15-4.10)                          | 8.80 (4.96-15.20)                               | 46 (33-56)                                   | 81 (81-82)                       | 9.4 (8.9-10.6)                   | 7.9 (7.5-8.5)           |
| <b>World Bank Groups:</b>             |                                                         |                               |                                           |                                                 |                                              |                                  |                                  |                         |
| -Low income (n=19)                    | 353.6                                                   | 1390 (429)                    | 0.07 (0.04-0.12)                          | 0.53 (0.26-0.77)                                | 10 (4-17)                                    | 59 (56-62)                       | 6.2 (4.8-8.1)                    | 1.6 (1.3-1.9)           |
| -Lower-middle income (n=30)           | 899.9                                                   | 4816 (2102)                   | 0.38 (0.17-1.60)                          | 0.90 (0.62-3.71)                                | 14 (7-31)                                    | 69 (64-72)                       | 5.8 (4.2-6.9)                    | 3.1 (2.4-4.0)           |
| -Upper-middle income (n=34)           | 2,200.5                                                 | 14547 (4236)                  | 1.49 (1.15-2.56)                          | 3.28 (1.41-5.41)                                | 27 (17-54)                                   | 74 (72-76)                       | 6.3 (5.4-7.2)                    | 4.7 (4.4-5.9)           |
| -High income (n=42)                   | 936.0                                                   | 38213 (19296)                 | 3.27 (2.43-3.78)                          | 6.27 (4.46-10.86)                               | 38 (32-56)                                   | 81 (77-82)                       | 8.9 (6.7-9.7)                    | 7.5 (6.8-8.1)           |

\* - data expressed as mean (SD); all other data represent median and interquartile ranges (IQR)

§ - (per 10,000 population)

\*\* - Data from the World Bank (2015)

GNI – gross national income; PPP – purchasing power parity; GDP – gross domestic product; ICT – Information and communications technology



**Table 2:** Remote patient monitoring [n (%)]

|                                       | Health system level* |          |          |              |                           |             | Programme type** |        |             |             |
|---------------------------------------|----------------------|----------|----------|--------------|---------------------------|-------------|------------------|--------|-------------|-------------|
|                                       | International        | Regional | National | Intermediate | Local or peripheral level | No response | Informal         | Pilot  | Established | No response |
| <b>Overall (n=125)</b>                | 4(3)                 | 4(3)     | 19(15)   | 21(17)       | 28(22)                    | 65(52)      | 12(10)           | 38(30) | 15(12)      | 67(54)      |
| <b>ISN regions:</b>                   |                      |          |          |              |                           |             |                  |        |             |             |
| -Africa (n=33)                        | 2(6)                 | 0(0)     | 3(9)     | 2(6)         | 4(12)                     | 25(76)      | 2(6)             | 5(15)  | 1(3)        | 25(76)      |
| -Eastern & Central Europe (n=17)      | 1(6)                 | 1(6)     | 3(18)    | 2(12)        | 5(29)                     | 6(35)       | 2(12)            | 9(53)  | 0(0)        | 6(35)       |
| -Latin America & the Caribbean (n=14) | 0(0)                 | 0(0)     | 1(7)     | 1(7)         | 4(29)                     | 9(64)       | 1(7)             | 4(29)  | 1(7)        | 9(64)       |
| -Middle East (n=8)                    | 0(0)                 | 0(0)     | 0(0)     | 2(25)        | 1(13)                     | 5(63)       | 1(13)            | 1(13)  | 1(13)       | 5(63)       |
| -NIS & Russia (n=11)                  | 0(0)                 | 1(9)     | 2(18)    | 3(27)        | 2(18)                     | 5(45)       | 3(27)            | 3(27)  | 1(9)        | 5(45)       |
| -North America (n=4)                  | 0(0)                 | 0(0)     | 0(0)     | 2(50)        | 1(25)                     | 2(50)       | 0(0)             | 1(25)  | 1(25)       | 3(75)       |
| -North and East Asia (n=4)            | 0(0)                 | 0(0)     | 2(50)    | 0(0)         | 1(25)                     | 1(25)       | 0(0)             | 1(25)  | 1(25)       | 2(50)       |
| -Oceania & South East Asia (n=10)     | 0(0)                 | 0(0)     | 0(0)     | 0(0)         | 3(30)                     | 7(70)       | 0(0)             | 3(30)  | 0(0)        | 7(70)       |
| -South Asia (n=5)                     | 1(20)                | 0(0)     | 1(20)    | 1(20)        | 0(0)                      | 2(40)       | 0(0)             | 2(40)  | 1(20)       | 2(40)       |
| -Western Europe (n=19)                | 0(0)                 | 2(11)    | 7(37)    | 8(42)        | 7(37)                     | 3(16)       | 3(16)            | 9(47)  | 8(42)       | 3(16)       |
| <b>World Bank Groups:</b>             |                      |          |          |              |                           |             |                  |        |             |             |
| -Low income (n=19)                    | 0(0)                 | 0(0)     | 3(16)    | 1(5)         | 2(11)                     | 13(68)      | 1(5)             | 3(16)  | 1(5)        | 14(74)      |
| -Lower-middle income (n=30)           | 2(7)                 | 1(3)     | 3(10)    | 3(10)        | 3(10)                     | 21(70)      | 3(10)            | 6(20)  | 1(3)        | 21(70)      |
| -Upper-middle income (n=34)           | 0(0)                 | 0(0)     | 3(9)     | 4(12)        | 6(18)                     | 22(65)      | 2(6)             | 9(26)  | 2(6)        | 22(65)      |
| -High income (n=42)                   | 2(5)                 | 3(7)     | 10(24)   | 13(31)       | 17(40)                    | 9(21)       | 6(14)            | 20(48) | 11(26)      | 10(24)      |

\*

**International level** – health entities in other countries in the world**Regional level** – health entities in countries in the same geographic region**National level** – referral hospitals, laboratories, and health institutes**Intermediate level, covering district or provincial facilities** – public, private for-profit and private not-for-profit (e.g., religious) hospitals and health centres**Local or peripheral level** – health posts, health centres providing basic level of care

\*\*

**Informal** – use of ICT for health purposes in the absence of formal processes and policies**Pilot** – testing and evaluating a programme**Established** – an ongoing programme that has been conducted for a minimum of 2 years and is planned to continue.



Figure 1

84x47mm (603 x 603 DPI)

1  
2  
3  
4  
5  
6  
7  
8  
9  
10  
11  
12  
13  
14  
15  
16  
17  
18  
19  
20  
21  
22  
23  
24  
25  
26  
27  
28  
29  
30  
31  
32  
33  
34  
35  
36  
37  
38  
39  
40  
41  
42  
43  
44  
45  
46  
47  
48  
49  
50  
51  
52  
53  
54  
55  
56  
57  
58  
59  
60

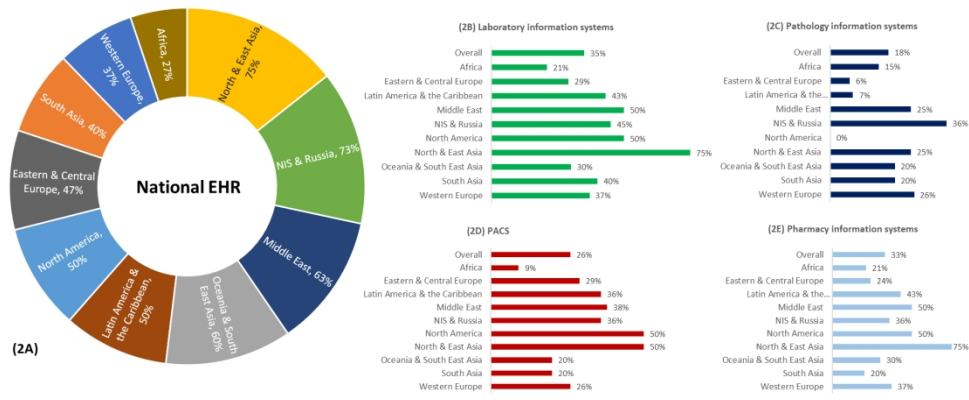

Figure 2

83x34mm (600 x 600 DPI)

1  
2  
3 **Supplementary Materials:**  
4  
5

6 **Supplementary Table S1: List of participating countries by ISN regions**  
7

|    | Africa                   | EC Europe         | Latin America          | Middle East        | NIS & Russia         | North America      | North East Asia     | OSEA                      | South Asia  | Western Europe |         |
|----|--------------------------|-------------------|------------------------|--------------------|----------------------|--------------------|---------------------|---------------------------|-------------|----------------|---------|
| 10 | Benin                    | Cabo Verde        | Moldova                | El Salvador        | Syrian Arab Republic | Armenia            | Jamaica             | Korea, Dem. People's Rep. | Cambodia    | Afghanistan    | Austria |
| 11 | Burkina Faso             | Cote d'Ivoire     | Albania                | Guatemala          | Iran, Islamic Rep.   | Georgia            | Canada              | China                     | Kiribati    | Bangladesh     | Belgium |
| 12 | Burundi                  | Ghana             | Bosnia and Herzegovina | Honduras           | Iraq                 | Kyrgyz Republic    | Trinidad and Tobago | Mongolia                  | Lao PDR     | Bhutan         | Denmark |
| 13 | Central African Republic | Kenya             | Bulgaria               | Colombia           | Jordan               | Tajikistan         | United States       | Japan                     | Philippines | Pakistan       | Finland |
| 14 | Comoros                  | Lesotho           | Montenegro             | Costa Rica         | Lebanon              | Ukraine            |                     | Timor-Leste               | Maldives    | Greece         |         |
| 15 | Ethiopia                 | Mauritania        | Romania                | Cuba               | Bahrain              | Uzbekistan         |                     | Vietnam                   |             | Iceland        |         |
| 16 | Gambia, The              | Morocco           | Serbia                 | Dominican Republic | Oman                 | Azerbaijan         |                     | Malaysia                  |             | Ireland        |         |
| 17 | Guinea-Bissau            | Senegal           | Turkey                 | Mexico             | Qatar                | Belarus            |                     | Australia                 |             | Israel         |         |
| 18 | Madagascar               | Sudan             | Croatia                | Panama             |                      | Kazakhstan         |                     | New Zealand               |             | Italy          |         |
| 19 | Malawi                   | Zambia            | Cyprus                 | Paraguay           |                      | Russian Federation |                     | Singapore                 |             | Luxembourg     |         |
| 20 | Mali                     | Algeria           | Czech Republic         | Peru               |                      | Turkmenistan       |                     |                           |             | Malta          |         |
| 21 | Niger                    | Botswana          | Estonia                | Argentina          |                      |                    |                     |                           |             | Netherlands    |         |
| 22 | Rwanda                   | Equatorial Guinea | Hungary                | Chile              |                      |                    |                     |                           |             | Norway         |         |
| 23 | Somalia                  | South Africa      | Latvia                 | Uruguay            |                      |                    |                     |                           |             | Portugal       |         |
| 24 | South Sudan              | Tunisia           | Lithuania              |                    |                      |                    |                     |                           |             | San Marino     |         |
| 25 | Uganda                   | Seychelles        | Poland                 |                    |                      |                    |                     |                           |             | Spain          |         |
| 26 | Zimbabwe                 |                   | Slovenia               |                    |                      |                    |                     |                           |             | Sweden         |         |
| 27 |                          |                   |                        |                    |                      |                    |                     |                           |             | Switzerland    |         |
| 28 |                          |                   |                        |                    |                      |                    |                     |                           |             | United Kingdom |         |

1  
2  
3  
4  
5  
6  
7  
8  
9  
10  
11  
12  
13  
14  
15  
16  
17  
18  
19  
20  
21  
22  
23  
24  
25  
26  
27  
28  
29  
30  
31  
32  
33  
34  
35  
36  
37  
38  
39  
40  
41  
42  
43  
44  
45  
46

Supplementary Table S2: mHealth for accessing services [n (%)]

|                                | Toll-free emergency |          |          |              |                           |             | Appointment reminders |          |          |              |                           |             | Treatment adherence |          |          |              |                           |             |
|--------------------------------|---------------------|----------|----------|--------------|---------------------------|-------------|-----------------------|----------|----------|--------------|---------------------------|-------------|---------------------|----------|----------|--------------|---------------------------|-------------|
|                                | International       | Regional | National | Intermediate | Local or peripheral level | No Response | International         | Regional | National | Intermediate | Local or peripheral level | No Response | International       | Regional | National | Intermediate | Local or peripheral level | No Response |
| <b>Overall</b>                 | 3(2)                | 9(7)     | 75(60)   | 20(16)       | 18(14)                    | 31(25)      | 0(0)                  | 8(6)     | 39(31)   | 22(18)       | 38(30)                    | 39(31)      | 1(1)                | 7(6)     | 15(12)   | 23(18)       | 35(28)                    | 65(52)      |
| <b>ISN regions:</b>            |                     |          |          |              |                           |             |                       |          |          |              |                           |             |                     |          |          |              |                           |             |
| -Africa                        | 0(0)                | 1(3)     | 16(48)   | 6(18)        | 4(12)                     | 13(39)      | 0(0)                  | 4(12)    | 12(36)   | 5(15)        | 8(24)                     | 13(39)      | 1(3)                | 4(12)    | 6(18)    | 5(15)        | 9(27)                     | 19(58)      |
| -Eastern & Central Europe      | 0(0)                | 0(0)     | 9(53)    | 1(6)         | 1(6)                      | 6(35)       | 0(0)                  | 0(0)     | 6(35)    | 0(0)         | 6(35)                     | 5(29)       | 0(0)                | 0(0)     | 2(12)    | 3(18)        | 4(24)                     | 8(47)       |
| -Latin America & the Caribbean | 0(0)                | 1(7)     | 11(79)   | 4(29)        | 4(29)                     | 0(0)        | 0(0)                  | 1(7)     | 7(50)    | 2(14)        | 3(21)                     | 3(21)       | 0(0)                | 0(0)     | 1(7)     | 4(29)        | 3(21)                     | 7(50)       |
| -Middle East                   | 0(0)                | 0(0)     | 6(75)    | 0(0)         | 1(13)                     | 1(13)       | 0(0)                  | 0(0)     | 4(50)    | 3(38)        | 1(13)                     | 1(13)       | 0(0)                | 0(0)     | 0(0)     | 1(13)        | 0(0)                      | 7(88)       |
| -NIS & Russia                  | 0(0)                | 3(27)    | 5(45)    | 3(27)        | 3(27)                     | 2(18)       | 0(0)                  | 1(9)     | 1(9)     | 1(9)         | 4(36)                     | 4(36)       | 0(0)                | 1(9)     | 1(9)     | 1(9)         | 4(36)                     | 5(45)       |
| -North America                 | 0(0)                | 0(0)     | 4(100)   | 1(25)        | 1(25)                     | 0(0)        | 0(0)                  | 0(0)     | 1(25)    | 2(50)        | 2(50)                     | 2(50)       | 0(0)                | 0(0)     | 0(0)     | 2(50)        | 2(50)                     | 1(25)       |
| -North and East Asia           | 0(0)                | 0(0)     | 2(50)    | 2(50)        | 1(25)                     | 1(25)       | 0(0)                  | 0(0)     | 0(0)     | 3(75)        | 1(25)                     | 1(25)       | 0(0)                | 0(0)     | 0(0)     | 0(0)         | 1(25)                     | 3(75)       |
| -Oceania & South East Asia     | 1(10)               | 1(10)    | 8(80)    | 1(10)        | 2(20)                     | 2(20)       | 0(0)                  | 0(0)     | 2(20)    | 5(50)        | 3(30)                     | 4(40)       | 0(0)                | 0(0)     | 1(10)    | 3(30)        | 4(40)                     | 5(50)       |
| -South Asia                    | 0(0)                | 0(0)     | 1(20)    | 1(20)        | 0(0)                      | 3(60)       | 0(0)                  | 0(0)     | 1(20)    | 2(40)        | 2(40)                     | 2(40)       | 0(0)                | 1(20)    | 2(40)    | 2(40)        | 1(20)                     | 2(40)       |
| -Western Europe                | 2(11)               | 3(16)    | 13(68)   | 1(5)         | 1(5)                      | 3(16)       | 0(0)                  | 2(11)    | 6(32)    | 3(16)        | 6(32)                     | 4(21)       | 0(0)                | 1(5)     | 2(11)    | 2(11)        | 7(37)                     | 8(42)       |
| <b>World Bank Groups:</b>      |                     |          |          |              |                           |             |                       |          |          |              |                           |             |                     |          |          |              |                           |             |
| -Low income                    | 0(0)                | 1(5)     | 8(42)    | 3(16)        | 2(11)                     | 9(47)       | 0(0)                  | 2(11)    | 5(26)    | 4(21)        | 6(32)                     | 7(37)       | 0(0)                | 2(11)    | 4(21)    | 4(21)        | 4(21)                     | 11(58)      |
| -Lower-middle income           | 1(3)                | 3(10)    | 18(60)   | 5(17)        | 6(20)                     | 6(20)       | 0(0)                  | 2(7)     | 12(40)   | 6(20)        | 8(27)                     | 11(37)      | 1(3)                | 2(7)     | 5(17)    | 5(17)        | 9(30)                     | 17(57)      |
| -Upper-middle income           | 0(0)                | 0(0)     | 17(50)   | 8(24)        | 6(18)                     | 10(29)      | 0(0)                  | 1(3)     | 8(24)    | 5(15)        | 8(24)                     | 14(41)      | 0(0)                | 2(6)     | 3(9)     | 3(9)         | 8(24)                     | 20(59)      |
| -High income                   | 2(5)                | 5(12)    | 32(76)   | 4(10)        | 4(10)                     | 6(14)       | 0(0)                  | 3(7)     | 14(33)   | 7(17)        | 16(38)                    | 7(17)       | 0(0)                | 1(2)     | 3(7)     | 11(26)       | 14(33)                    | 17(40)      |

**Figure S1:** National eHealth policies / strategies across ISN regions



**Figure S2:** Funding sources for eHealth by income groups

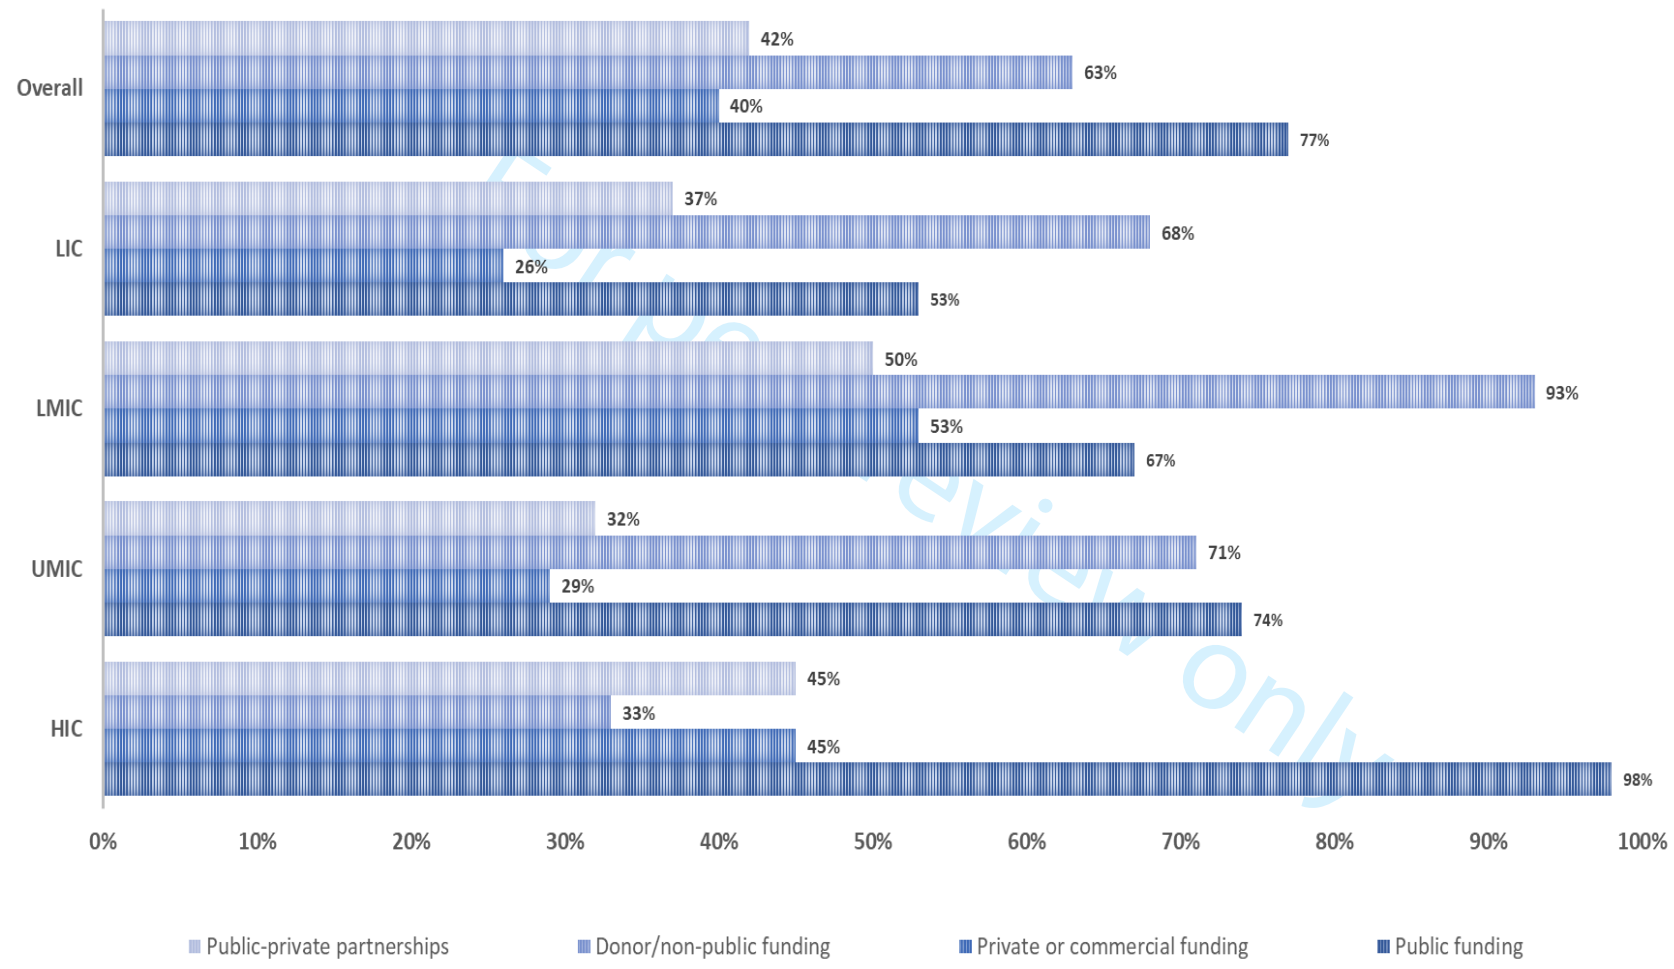

**Figure S3: eHealth capacity building**

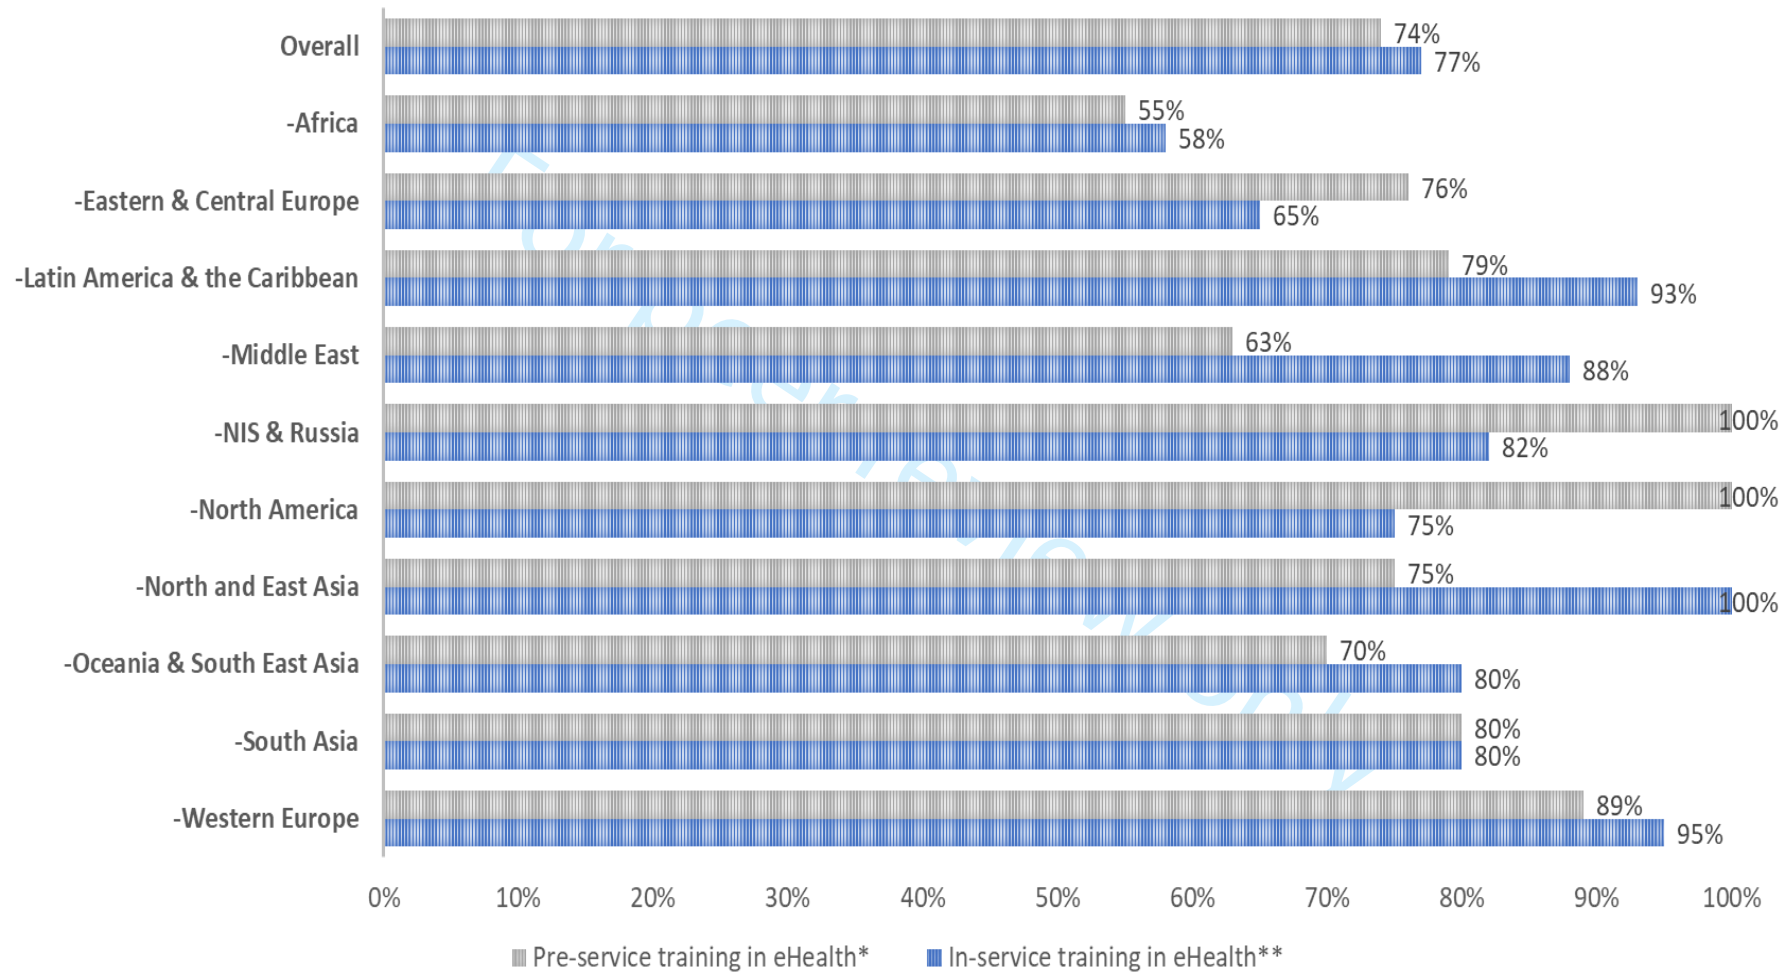



**Figure S4:** Use of e-learning in health sciences across ISN regions



**Figure S5: Health facilities with EHR in ISN regions**



**Figure S6:** Availability of human resources for Health Information Systems (HIS)

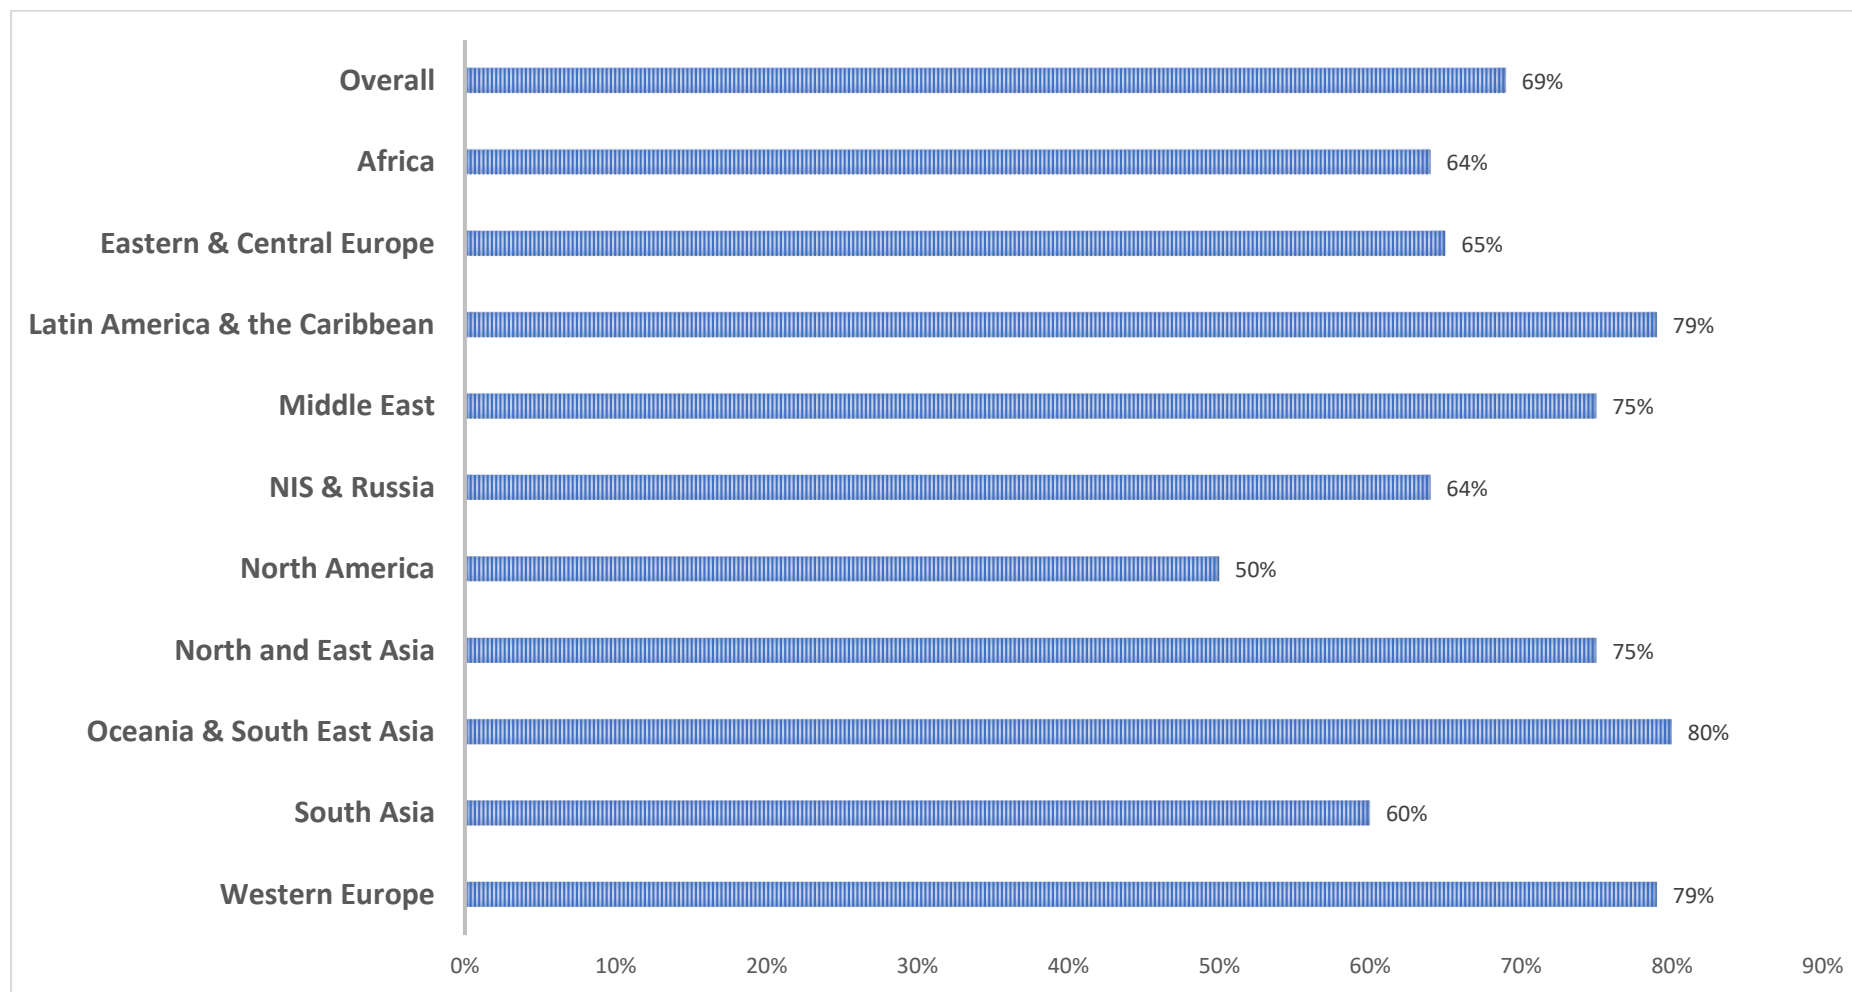

**Figure S7:** Legal framework for eHealth across income groups

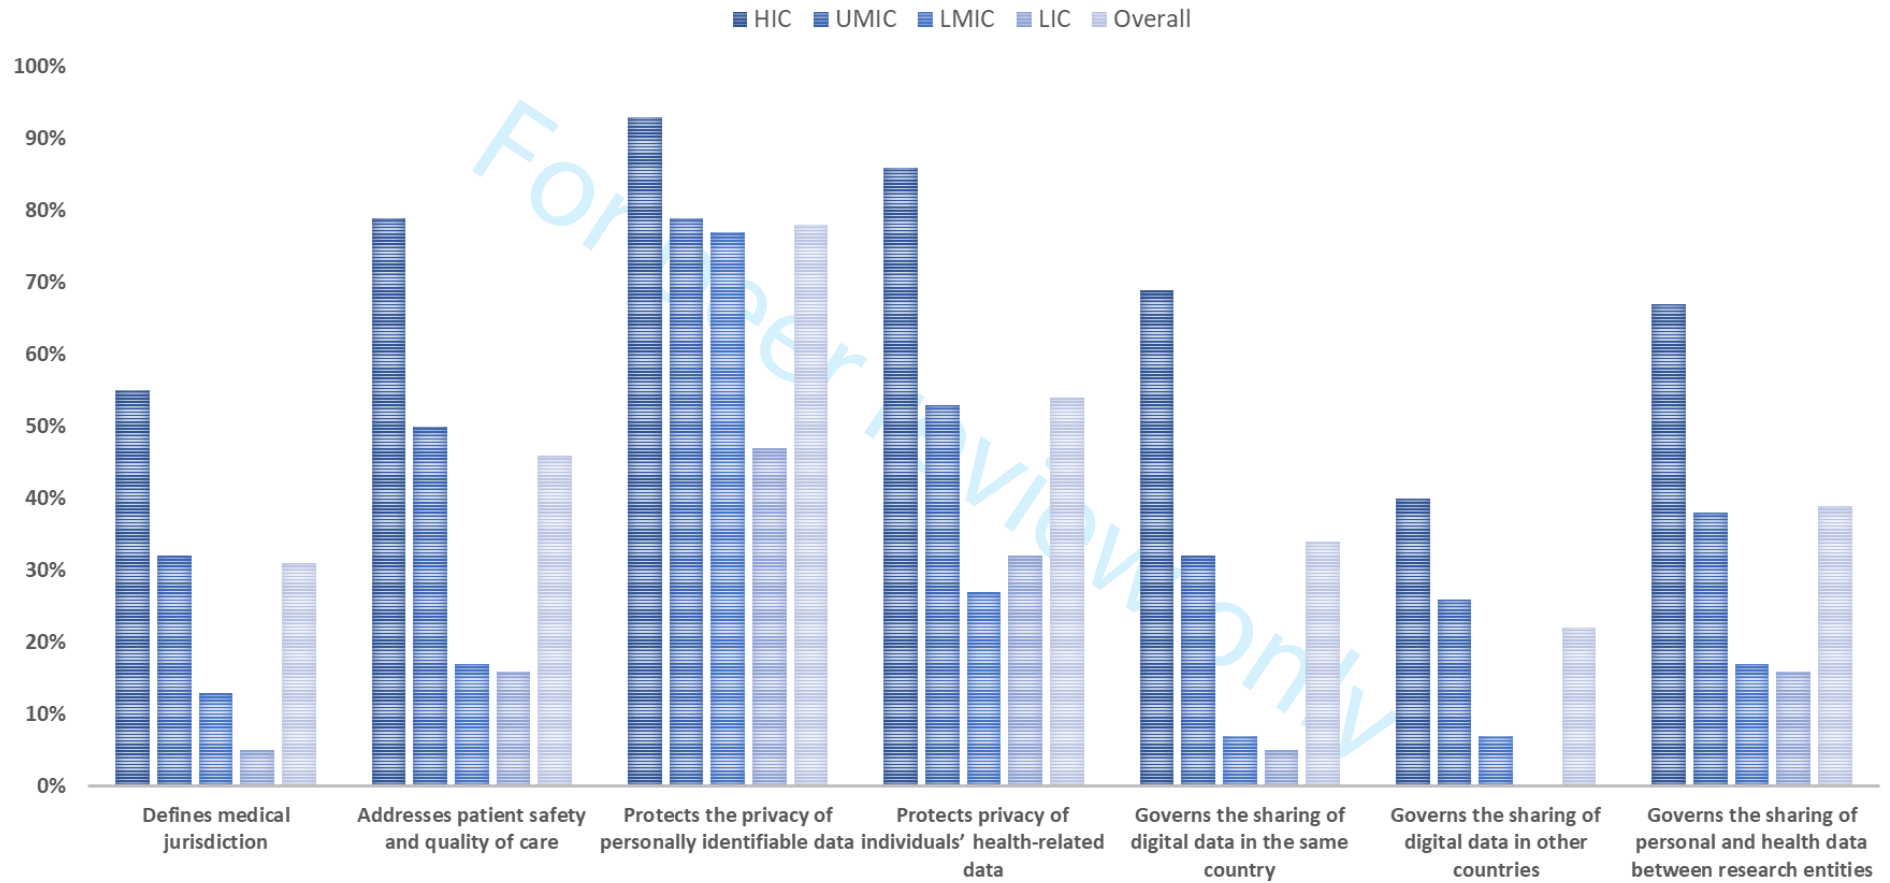

**Figure S8:** Health care organizations use of social media across ISN regions



**Figure S9:** Policy / strategy governing the use of big data

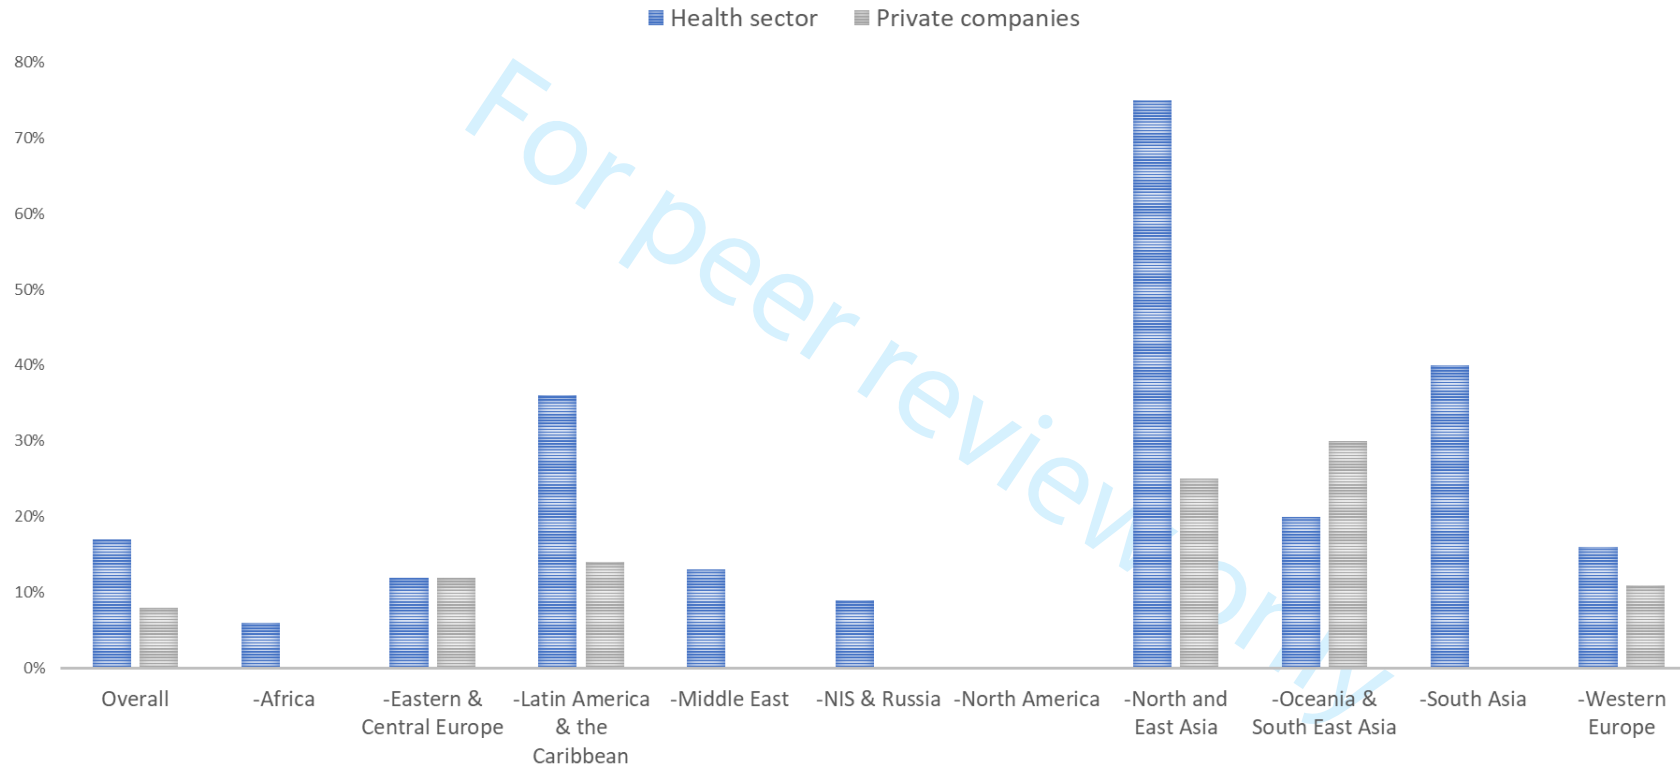

## Supplementary Appendix

### Checklist for Reporting Results of Internet E-Surveys (CHERRIES)

| <b>Checklist Item</b>            | <b>Explanation</b>                                                                                                                                                                                                                                                                                                                                                                                                                            | <b>Page Number</b> |
|----------------------------------|-----------------------------------------------------------------------------------------------------------------------------------------------------------------------------------------------------------------------------------------------------------------------------------------------------------------------------------------------------------------------------------------------------------------------------------------------|--------------------|
| Describe survey design           | Describe target population, sample frame. Is the sample a convenience sample? (In "open" surveys this is most likely.)                                                                                                                                                                                                                                                                                                                        | 6                  |
| IRB approval                     | Mention whether the study has been approved by an IRB.                                                                                                                                                                                                                                                                                                                                                                                        | 20                 |
| Informed consent                 | Describe the informed consent process. Where were the participants told the length of time of the survey, which data were stored and where and for how long, who the investigator was, and the purpose of the study?                                                                                                                                                                                                                          | 20                 |
| Data protection                  | If any personal information was collected or stored, describe what mechanisms were used to protect unauthorized access.                                                                                                                                                                                                                                                                                                                       | 8 (LimeSurvey)     |
| Development and testing          | State how the survey was developed, including whether the usability and technical functionality of the electronic questionnaire had been tested before fielding the questionnaire.                                                                                                                                                                                                                                                            | 6-8                |
| Open survey versus closed survey | An "open survey" is a survey open for each visitor of a site, while a closed survey is only open to a sample which the investigator knows (password-protected survey).                                                                                                                                                                                                                                                                        | N/A                |
| Contact mode                     | Indicate whether or not the initial contact with the potential participants was made on the Internet. (Investigators may also send out questionnaires by mail and allow for Web-based data entry.)                                                                                                                                                                                                                                            | 8                  |
| Advertising the survey           | How/where was the survey announced or advertised? Some examples are offline media (newspapers), or online (mailing lists – If yes, which ones?) or banner ads (Where were these banner ads posted and what did they look like?). It is important to know the wording of the announcement as it will heavily influence who chooses to participate. Ideally the survey announcement should be published as an appendix.                         | 8                  |
| Web/E-mail                       | State the type of e-survey (e.g., one posted on a Web site, or one sent out through e-mail). If it is an e-mail survey, were the responses entered manually into a database, or was there an automatic method for capturing responses?                                                                                                                                                                                                        | 8                  |
| Context                          | Describe the Web site (for mailing list/newsgroup) in which the survey was posted. What is the Web site about, who is visiting it, what are visitors normally looking for? Discuss to what degree the content of the Web site could pre-select the sample or influence the results. For example, a survey about vaccination on an anti-immunization Web site will have different results from a Web survey conducted on a government Web site | 8                  |
| Mandatory/voluntary              | Was it a mandatory survey to be filled in by every visitor who wanted to enter the Web site, or was it a voluntary survey?                                                                                                                                                                                                                                                                                                                    | 8                  |
| Incentives                       | Were any incentives offered (e.g., monetary, prizes, or non-monetary incentives such as an offer to provide the survey results)?                                                                                                                                                                                                                                                                                                              | N/A                |

|    |                                                                                                           |                                                                                                                                                                                                                                                                                                                                                                                                                                                                                               |              |
|----|-----------------------------------------------------------------------------------------------------------|-----------------------------------------------------------------------------------------------------------------------------------------------------------------------------------------------------------------------------------------------------------------------------------------------------------------------------------------------------------------------------------------------------------------------------------------------------------------------------------------------|--------------|
| 1  | Time/Date                                                                                                 | In what timeframe were the data collected?                                                                                                                                                                                                                                                                                                                                                                                                                                                    | 8            |
| 2  | Randomization of items or questionnaires                                                                  | To prevent biases items can be randomized or alternated.                                                                                                                                                                                                                                                                                                                                                                                                                                      | N/A          |
| 3  | Adaptive questioning                                                                                      | Use adaptive questioning (certain items, or only conditionally displayed based on responses to other items) to reduce number and complexity of the questions.                                                                                                                                                                                                                                                                                                                                 | N/A          |
| 4  | Number of Items                                                                                           | What was the number of questionnaire items per page? The number of items is an important factor for the completion rate.                                                                                                                                                                                                                                                                                                                                                                      | Not reported |
| 5  | Number of screens (pages)                                                                                 | Over how many pages was the questionnaire distributed? The number of items is an important factor for the completion rate.                                                                                                                                                                                                                                                                                                                                                                    | Not reported |
| 6  | Completeness check                                                                                        | It is technically possible to do consistency or completeness checks before the questionnaire is submitted. Was this done, and if "yes", how (usually JAVAScript)? An alternative is to check for completeness after the questionnaire has been submitted (and highlight mandatory items). If this has been done, it should be reported. All items should provide a non-response option such as "not applicable" or "rather not say", and selection of one response option should be enforced. | Not reported |
| 7  | Review step                                                                                               | State whether respondents were able to review and change their answers (e.g., through a Back button or a Review step which displays a summary of the responses and asks the respondents if they are correct).                                                                                                                                                                                                                                                                                 | Not reported |
| 8  | Unique site visitor                                                                                       | If you provide view rates or participation rates, you need to define how you determined a unique visitor. There are different techniques available, based on IP addresses or cookies or both.                                                                                                                                                                                                                                                                                                 | Not reported |
| 9  | View rate (Ratio of unique survey visitors/unique site visitors)                                          | Requires counting unique visitors to the first page of the survey, divided by the number of unique site visitors (not page views!). It is not unusual to have view rates of less than 0.1 % if the survey is voluntary.                                                                                                                                                                                                                                                                       | Not reported |
| 10 | Participation rate (Ratio of unique visitors who agreed to participate/unique first survey page visitors) | Count the unique number of people who filled in the first survey page (or agreed to participate, for example by checking a checkbox), divided by visitors who visit the first page of the survey (or the informed consents page, if present). This can also be called "recruitment" rate.                                                                                                                                                                                                     | Not reported |
| 11 | Completion rate (Ratio of users who finished the survey/users who                                         | The number of people submitting the last questionnaire page, divided by the number of people who agreed to participate (or submitted the first survey page). This is only relevant if there is a separate "informed consent" page or if the survey goes over several pages. This is a measure for attrition. Note that "completion" can                                                                                                                                                       | 10           |



|    |                                                     |                                                                                                                                                                                                                                                                                                                                                                                                                                                                                                                                                                            |              |
|----|-----------------------------------------------------|----------------------------------------------------------------------------------------------------------------------------------------------------------------------------------------------------------------------------------------------------------------------------------------------------------------------------------------------------------------------------------------------------------------------------------------------------------------------------------------------------------------------------------------------------------------------------|--------------|
| 1  | agreed to participate)                              | involve leaving questionnaire items blank. This is not a measure for how completely questionnaires were filled in. (If you need a measure for this, use the word "completeness rate".)                                                                                                                                                                                                                                                                                                                                                                                     |              |
| 2  |                                                     |                                                                                                                                                                                                                                                                                                                                                                                                                                                                                                                                                                            |              |
| 3  |                                                     |                                                                                                                                                                                                                                                                                                                                                                                                                                                                                                                                                                            |              |
| 4  |                                                     |                                                                                                                                                                                                                                                                                                                                                                                                                                                                                                                                                                            |              |
| 5  |                                                     |                                                                                                                                                                                                                                                                                                                                                                                                                                                                                                                                                                            |              |
| 6  | Cookies used                                        | Indicate whether cookies were used to assign a unique user identifier to each client computer. If so, mention the page on which the cookie was set and read, and how long the cookie was valid. Were duplicate entries avoided by preventing users access to the survey twice; or were duplicate database entries having the same user ID eliminated before analysis? In the latter case, which entries were kept for analysis (eg, the first entry or the most recent)?                                                                                                   | Not reported |
| 7  |                                                     |                                                                                                                                                                                                                                                                                                                                                                                                                                                                                                                                                                            |              |
| 8  |                                                     |                                                                                                                                                                                                                                                                                                                                                                                                                                                                                                                                                                            |              |
| 9  |                                                     |                                                                                                                                                                                                                                                                                                                                                                                                                                                                                                                                                                            |              |
| 10 |                                                     |                                                                                                                                                                                                                                                                                                                                                                                                                                                                                                                                                                            |              |
| 11 | IP check                                            | Indicate whether the IP address of the client computer was used to identify potential duplicate entries from the same user. If so, mention the period of time for which no two entries from the same IP address were allowed (eg, 24 hours). Were duplicate entries avoided by preventing users with the same IP address access to the survey twice; or were duplicate database entries having the same IP address within a given period of time eliminated before analysis? If the latter, which entries were kept for analysis (eg, the first entry or the most recent)? | Not reported |
| 12 |                                                     |                                                                                                                                                                                                                                                                                                                                                                                                                                                                                                                                                                            |              |
| 13 |                                                     |                                                                                                                                                                                                                                                                                                                                                                                                                                                                                                                                                                            |              |
| 14 |                                                     |                                                                                                                                                                                                                                                                                                                                                                                                                                                                                                                                                                            |              |
| 15 |                                                     |                                                                                                                                                                                                                                                                                                                                                                                                                                                                                                                                                                            |              |
| 16 |                                                     |                                                                                                                                                                                                                                                                                                                                                                                                                                                                                                                                                                            |              |
| 17 |                                                     |                                                                                                                                                                                                                                                                                                                                                                                                                                                                                                                                                                            |              |
| 18 | Log file analysis                                   | Indicate whether other techniques to analyze the log file for identification of multiple entries were used. If so, please describe.                                                                                                                                                                                                                                                                                                                                                                                                                                        | Not reported |
| 19 |                                                     |                                                                                                                                                                                                                                                                                                                                                                                                                                                                                                                                                                            |              |
| 20 |                                                     |                                                                                                                                                                                                                                                                                                                                                                                                                                                                                                                                                                            |              |
| 21 | Registration                                        | In "closed" (non-open) surveys, users need to login first and it is easier to prevent duplicate entries from the same user. Describe how this was done. For example, was the survey never displayed a second time once the user had filled it in, or was the username stored together with the survey results and later eliminated? If the latter, which entries were kept for analysis (e.g., the first entry or the most recent)?                                                                                                                                        | Not reported |
| 22 |                                                     |                                                                                                                                                                                                                                                                                                                                                                                                                                                                                                                                                                            |              |
| 23 |                                                     |                                                                                                                                                                                                                                                                                                                                                                                                                                                                                                                                                                            |              |
| 24 |                                                     |                                                                                                                                                                                                                                                                                                                                                                                                                                                                                                                                                                            |              |
| 25 | Handling of incomplete questionnaires               | Were only completed questionnaires analyzed? Were questionnaires which terminated early (where, for example, users did not go through all questionnaire pages) also analyzed?                                                                                                                                                                                                                                                                                                                                                                                              | 10           |
| 26 |                                                     |                                                                                                                                                                                                                                                                                                                                                                                                                                                                                                                                                                            |              |
| 27 |                                                     |                                                                                                                                                                                                                                                                                                                                                                                                                                                                                                                                                                            |              |
| 28 | Questionnaires submitted with an atypical timestamp | Some investigators may measure the time people needed to fill in a questionnaire and exclude questionnaires that were submitted too soon. Specify the timeframe that was used as a cut-off point and describe how this point was determined.                                                                                                                                                                                                                                                                                                                               | Not reported |
| 29 |                                                     |                                                                                                                                                                                                                                                                                                                                                                                                                                                                                                                                                                            |              |
| 30 |                                                     |                                                                                                                                                                                                                                                                                                                                                                                                                                                                                                                                                                            |              |
| 31 |                                                     |                                                                                                                                                                                                                                                                                                                                                                                                                                                                                                                                                                            |              |
| 32 | Statistical correction                              | Indicate whether any methods such as weighting of items or propensity scores have been used to adjust for the non-representative sample; if so, please describe the methods.                                                                                                                                                                                                                                                                                                                                                                                               | Not reported |
| 33 |                                                     |                                                                                                                                                                                                                                                                                                                                                                                                                                                                                                                                                                            |              |
| 34 |                                                     |                                                                                                                                                                                                                                                                                                                                                                                                                                                                                                                                                                            |              |

35 This checklist has been modified from Eysenbach G. Improving the quality of Web surveys: the Checklist for Reporting Results of Internet E-Surveys (CHERRIES). J Med Internet Res. 2004 Sep 29;6(3):e34 [erratum in J Med Internet Res. 2012; 14(1): e8.]. Article available at  
36 <https://www.jmir.org/2004/3/e34/>; erratum available <https://www.jmir.org/2012/1/e8/>. Copyright ©Gunther Eysenbach. Originally published in the  
37 [Journal of Medical Internet](https://www.jmir.org/2004/3/e34/) Research, 29.9.2004 and 04.01.2012.  
38  
39  
40  
41  
42  
43  
44  
45  
46

### Checklist for Reporting Results of Internet E-Surveys (CHERRIES)

| <b>Checklist Item</b>            | <b>Explanation</b>                                                                                                                                                                                                                                                                                                                                                                                                                            | <b>Page Number</b> |
|----------------------------------|-----------------------------------------------------------------------------------------------------------------------------------------------------------------------------------------------------------------------------------------------------------------------------------------------------------------------------------------------------------------------------------------------------------------------------------------------|--------------------|
| Describe survey design           | Describe target population, sample frame. Is the sample a convenience sample? (In "open" surveys this is most likely.)                                                                                                                                                                                                                                                                                                                        | 6                  |
| IRB approval                     | Mention whether the study has been approved by an IRB.                                                                                                                                                                                                                                                                                                                                                                                        | 20                 |
| Informed consent                 | Describe the informed consent process. Where were the participants told the length of time of the survey, which data were stored and where and for how long, who the investigator was, and the purpose of the study?                                                                                                                                                                                                                          | 20                 |
| Data protection                  | If any personal information was collected or stored, describe what mechanisms were used to protect unauthorized access.                                                                                                                                                                                                                                                                                                                       | 8 (LimeSurvey)     |
| Development and testing          | State how the survey was developed, including whether the usability and technical functionality of the electronic questionnaire had been tested before fielding the questionnaire.                                                                                                                                                                                                                                                            | 6-8                |
| Open survey versus closed survey | An "open survey" is a survey open for each visitor of a site, while a closed survey is only open to a sample which the investigator knows (password-protected survey).                                                                                                                                                                                                                                                                        | N/A                |
| Contact mode                     | Indicate whether or not the initial contact with the potential participants was made on the Internet. (Investigators may also send out questionnaires by mail and allow for Web-based data entry.)                                                                                                                                                                                                                                            | 8                  |
| Advertising the survey           | How/where was the survey announced or advertised? Some examples are offline media (newspapers), or online (mailing lists – If yes, which ones?) or banner ads (Where were these banner ads posted and what did they look like?). It is important to know the wording of the announcement as it will heavily influence who chooses to participate. Ideally the survey announcement should be published as an appendix.                         | 8                  |
| Web/E-mail                       | State the type of e-survey (e.g., one posted on a Web site, or one sent out through e-mail). If it is an e-mail survey, were the responses entered manually into a database, or was there an automatic method for capturing responses?                                                                                                                                                                                                        | 8                  |
| Context                          | Describe the Web site (for mailing list/newsgroup) in which the survey was posted. What is the Web site about, who is visiting it, what are visitors normally looking for? Discuss to what degree the content of the Web site could pre-select the sample or influence the results. For example, a survey about vaccination on an anti-immunization Web site will have different results from a Web survey conducted on a government Web site | 8                  |
| Mandatory/voluntary              | Was it a mandatory survey to be filled in by every visitor who wanted to enter the Web site, or was it a voluntary survey?                                                                                                                                                                                                                                                                                                                    | 8                  |
| Incentives                       | Were any incentives offered (e.g., monetary, prizes, or non-monetary incentives such as an offer to provide the survey results)?                                                                                                                                                                                                                                                                                                              | N/A                |

|    |                                                                                                           |                                                                                                                                                                                                                                                                                                                                                                                                                                                                                               |              |
|----|-----------------------------------------------------------------------------------------------------------|-----------------------------------------------------------------------------------------------------------------------------------------------------------------------------------------------------------------------------------------------------------------------------------------------------------------------------------------------------------------------------------------------------------------------------------------------------------------------------------------------|--------------|
| 1  | Time/Date                                                                                                 | In what timeframe were the data collected?                                                                                                                                                                                                                                                                                                                                                                                                                                                    | 8            |
| 2  | Randomization of items or questionnaires                                                                  | To prevent biases items can be randomized or alternated.                                                                                                                                                                                                                                                                                                                                                                                                                                      | N/A          |
| 3  | Adaptive questioning                                                                                      | Use adaptive questioning (certain items, or only conditionally displayed based on responses to other items) to reduce number and complexity of the questions.                                                                                                                                                                                                                                                                                                                                 | N/A          |
| 4  | Number of Items                                                                                           | What was the number of questionnaire items per page? The number of items is an important factor for the completion rate.                                                                                                                                                                                                                                                                                                                                                                      | Not reported |
| 5  | Number of screens (pages)                                                                                 | Over how many pages was the questionnaire distributed? The number of items is an important factor for the completion rate.                                                                                                                                                                                                                                                                                                                                                                    | Not reported |
| 6  | Completeness check                                                                                        | It is technically possible to do consistency or completeness checks before the questionnaire is submitted. Was this done, and if "yes", how (usually JavaScript)? An alternative is to check for completeness after the questionnaire has been submitted (and highlight mandatory items). If this has been done, it should be reported. All items should provide a non-response option such as "not applicable" or "rather not say", and selection of one response option should be enforced. | Not reported |
| 7  | Review step                                                                                               | State whether respondents were able to review and change their answers (e.g., through a Back button or a Review step which displays a summary of the responses and asks the respondents if they are correct).                                                                                                                                                                                                                                                                                 | Not reported |
| 8  | Unique site visitor                                                                                       | If you provide view rates or participation rates, you need to define how you determined a unique visitor. There are different techniques available, based on IP addresses or cookies or both.                                                                                                                                                                                                                                                                                                 | Not reported |
| 9  | View rate (Ratio of unique survey visitors/unique site visitors)                                          | Requires counting unique visitors to the first page of the survey, divided by the number of unique site visitors (not page views!). It is not unusual to have view rates of less than 0.1 % if the survey is voluntary.                                                                                                                                                                                                                                                                       | Not reported |
| 10 | Participation rate (Ratio of unique visitors who agreed to participate/unique first survey page visitors) | Count the unique number of people who filled in the first survey page (or agreed to participate, for example by checking a checkbox), divided by visitors who visit the first page of the survey (or the informed consents page, if present). This can also be called "recruitment" rate.                                                                                                                                                                                                     | Not reported |
| 11 | Completion rate (Ratio of users who finished the survey/users who                                         | The number of people submitting the last questionnaire page, divided by the number of people who agreed to participate (or submitted the first survey page). This is only relevant if there is a separate "informed consent" page or if the survey goes over several pages. This is a measure for attrition. Note that                                                                                                                                                                        | 10           |

|    |                                                     |                                                                                                                                                                                                                                                                                                                                                                                                                                                                                                                                                                            |              |
|----|-----------------------------------------------------|----------------------------------------------------------------------------------------------------------------------------------------------------------------------------------------------------------------------------------------------------------------------------------------------------------------------------------------------------------------------------------------------------------------------------------------------------------------------------------------------------------------------------------------------------------------------------|--------------|
| 1  | agreed to participate)                              | "completion" can involve leaving questionnaire items blank. This is not a measure for how completely questionnaires were filled in. (If you need a measure for this, use the word "completeness rate".)                                                                                                                                                                                                                                                                                                                                                                    |              |
| 2  |                                                     |                                                                                                                                                                                                                                                                                                                                                                                                                                                                                                                                                                            |              |
| 3  |                                                     |                                                                                                                                                                                                                                                                                                                                                                                                                                                                                                                                                                            |              |
| 4  |                                                     |                                                                                                                                                                                                                                                                                                                                                                                                                                                                                                                                                                            |              |
| 5  |                                                     |                                                                                                                                                                                                                                                                                                                                                                                                                                                                                                                                                                            |              |
| 6  | Cookies used                                        | Indicate whether cookies were used to assign a unique user identifier to each client computer. If so, mention the page on which the cookie was set and read, and how long the cookie was valid. Were duplicate entries avoided by preventing users access to the survey twice; or were duplicate database entries having the same user ID eliminated before analysis? In the latter case, which entries were kept for analysis (eg, the first entry or the most recent)?                                                                                                   | Not reported |
| 7  |                                                     |                                                                                                                                                                                                                                                                                                                                                                                                                                                                                                                                                                            |              |
| 8  |                                                     |                                                                                                                                                                                                                                                                                                                                                                                                                                                                                                                                                                            |              |
| 9  |                                                     |                                                                                                                                                                                                                                                                                                                                                                                                                                                                                                                                                                            |              |
| 10 |                                                     |                                                                                                                                                                                                                                                                                                                                                                                                                                                                                                                                                                            |              |
| 11 | IP check                                            | Indicate whether the IP address of the client computer was used to identify potential duplicate entries from the same user. If so, mention the period of time for which no two entries from the same IP address were allowed (eg, 24 hours). Were duplicate entries avoided by preventing users with the same IP address access to the survey twice; or were duplicate database entries having the same IP address within a given period of time eliminated before analysis? If the latter, which entries were kept for analysis (eg, the first entry or the most recent)? | Not reported |
| 12 |                                                     |                                                                                                                                                                                                                                                                                                                                                                                                                                                                                                                                                                            |              |
| 13 |                                                     |                                                                                                                                                                                                                                                                                                                                                                                                                                                                                                                                                                            |              |
| 14 |                                                     |                                                                                                                                                                                                                                                                                                                                                                                                                                                                                                                                                                            |              |
| 15 |                                                     |                                                                                                                                                                                                                                                                                                                                                                                                                                                                                                                                                                            |              |
| 16 |                                                     |                                                                                                                                                                                                                                                                                                                                                                                                                                                                                                                                                                            |              |
| 17 |                                                     |                                                                                                                                                                                                                                                                                                                                                                                                                                                                                                                                                                            |              |
| 18 | Log file analysis                                   | Indicate whether other techniques to analyze the log file for identification of multiple entries were used. If so, please describe.                                                                                                                                                                                                                                                                                                                                                                                                                                        | Not reported |
| 19 |                                                     |                                                                                                                                                                                                                                                                                                                                                                                                                                                                                                                                                                            |              |
| 20 |                                                     |                                                                                                                                                                                                                                                                                                                                                                                                                                                                                                                                                                            |              |
| 21 | Registration                                        | In "closed" (non-open) surveys, users need to login first and it is easier to prevent duplicate entries from the same user. Describe how this was done. For example, was the survey never displayed a second time once the user had filled it in, or was the username stored together with the survey results and later eliminated? If the latter, which entries were kept for analysis (e.g., the first entry or the most recent)?                                                                                                                                        | Not reported |
| 22 |                                                     |                                                                                                                                                                                                                                                                                                                                                                                                                                                                                                                                                                            |              |
| 23 |                                                     |                                                                                                                                                                                                                                                                                                                                                                                                                                                                                                                                                                            |              |
| 24 |                                                     |                                                                                                                                                                                                                                                                                                                                                                                                                                                                                                                                                                            |              |
| 25 | Handling of incomplete questionnaires               | Were only completed questionnaires analyzed? Were questionnaires which terminated early (where, for example, users did not go through all questionnaire pages) also analyzed?                                                                                                                                                                                                                                                                                                                                                                                              | 10           |
| 26 |                                                     |                                                                                                                                                                                                                                                                                                                                                                                                                                                                                                                                                                            |              |
| 27 |                                                     |                                                                                                                                                                                                                                                                                                                                                                                                                                                                                                                                                                            |              |
| 28 | Questionnaires submitted with an atypical timestamp | Some investigators may measure the time people needed to fill in a questionnaire and exclude questionnaires that were submitted too soon. Specify the timeframe that was used as a cut-off point and describe how this point was determined.                                                                                                                                                                                                                                                                                                                               | Not reported |
| 29 |                                                     |                                                                                                                                                                                                                                                                                                                                                                                                                                                                                                                                                                            |              |
| 30 |                                                     |                                                                                                                                                                                                                                                                                                                                                                                                                                                                                                                                                                            |              |
| 31 |                                                     |                                                                                                                                                                                                                                                                                                                                                                                                                                                                                                                                                                            |              |
| 32 | Statistical correction                              | Indicate whether any methods such as weighting of items or propensity scores have been used to adjust for the non-representative sample; if so, please describe the methods.                                                                                                                                                                                                                                                                                                                                                                                               | Not reported |
| 33 |                                                     |                                                                                                                                                                                                                                                                                                                                                                                                                                                                                                                                                                            |              |
| 34 |                                                     |                                                                                                                                                                                                                                                                                                                                                                                                                                                                                                                                                                            |              |
| 35 |                                                     |                                                                                                                                                                                                                                                                                                                                                                                                                                                                                                                                                                            |              |

36 This checklist has been modified from Eysenbach G. Improving the quality of Web surveys: the Checklist for Reporting Results of Internet E-Surveys (CHERRIES). J Med Internet Res. 2004 Sep 29;6(3):e34 [erratum in J Med Internet Res. 2012; 14(1): e8.]. Article available at <https://www.jmir.org/2004/3/e34/>; erratum available <https://www.jmir.org/2012/1/e8/>. Copyright ©Gunther Eysenbach. Originally published in the [Journal of Medical Internet Research](https://www.jmir.org/2004/3/e34/), 29.9.2004 and 04.01.2012.
